# Supplementary material for: DEELIG: A Deep Learning Approach to Predict Protein-Ligand Binding Affinity
Source: PubMed Central journal article supplement — Bioinform Biol Insights. 2021 Jul 7;15:11779322211030364. doi: 10.1177/11779322211030364 (PMC8274096; doi:10.1177/11779322211030364), 2021-07-07
Supplement: sj-pdf-1-bbi-10.1177_11779322211030364.pdf [file sj-pdf-1-bbi-10.1177_11779322211030364.pdf]

# **DEELIG: A docking-free deep learning-based approach to predict protein-ligand binding affinity**

## **Supplementary Document: Appendix File**

### **List of appendices:**

Appendix A: List of ligand features calculated for DEELIG

Appendix B: (1) Network layout for modules and (2) Hyperparameters in Composite model

Appendix C: Training curve for Composite model

Appendix D: DEELIG performance on Kinases dataset

## Appendix A

### List of Ligand features calculated for DEELIG

Following properties were calculated using PADEL:

- Basic Group Count
- Carbon Type
- Hybridization Ratio
- Manhold LogP (The Ratio of carbon to hetero atoms)
- Number of Aromatic bonds
- MACCS Key
- Klehotaroth fingerprints (Types and Counts)
- AtomPair2D fingerprints (Types and Counts)

Following ADMET properties were calculated using PADEL:

- *donorHB*
- *accptHB*
- *Constitutional (Electronegativity)*
- *rotatableBondCounts (#ringatoms)*
- *RuleofFive*
- *VABC (Volume)*
- *Weight (mol\_MW)*

Following ADMET properties were calculated using OikProp:

- Amine
- Amidine
- Acid
- Amide
- Rotor
- rtvFG (reactive functional groups)
- mol\_MW, dipole
- Volume
- donorHB
- accptHB

- QPpolrz (polarizability)
- SASA
  - SASA (probe of 1.4Å)
  - FOSA (hydrophobic component of SASA)
  - FISA (hydrophilic component of SASA)
  - PISA (pi of SASA)
  - WPSA (polar of SASA)
  - SAFluorine
  - SAamideO
- **Partition coefficients =>**
  - QPlogPC16
  - QPlogPoct
  - QPlogPw
  - QPlogPo/w
- CIQPlogS (**Conformation indie aqueous solubility**)
- IP (ev) ( ionization potential)
- EA (eV) (electron affinity)
- #metab (likely metabolic reactions)
- PSA (van der waals SA of polar N and O atoms)
- #NandO, #ringatoms (number of atoms in rings)
- #in34 (number of atoms in 3 or 4 membered rings)
- #in56 (number of atoms in 5 or 6 membered rings)
- #noncon (ring atoms cannot form conjugated aromatic bonds)
- #nonHatm (heavy atoms- nonhydrogen atoms)
- RuleOfThree
- RuleOfFive (lipinski violations)
- QPlogKhsa (binding to human serum albumin)
- PercentHuman-OralAbsorption
- Globular nature index

## **Appendix B**

### **1. Network Layout for modules**

Following is the detailed layout of the modules Atomic Model and Composite Model that have been referenced in the main article in **Sections 4.4.1** and **4.4.2** respectively.

Hyperparameters of the Composite Model have also been provided here.

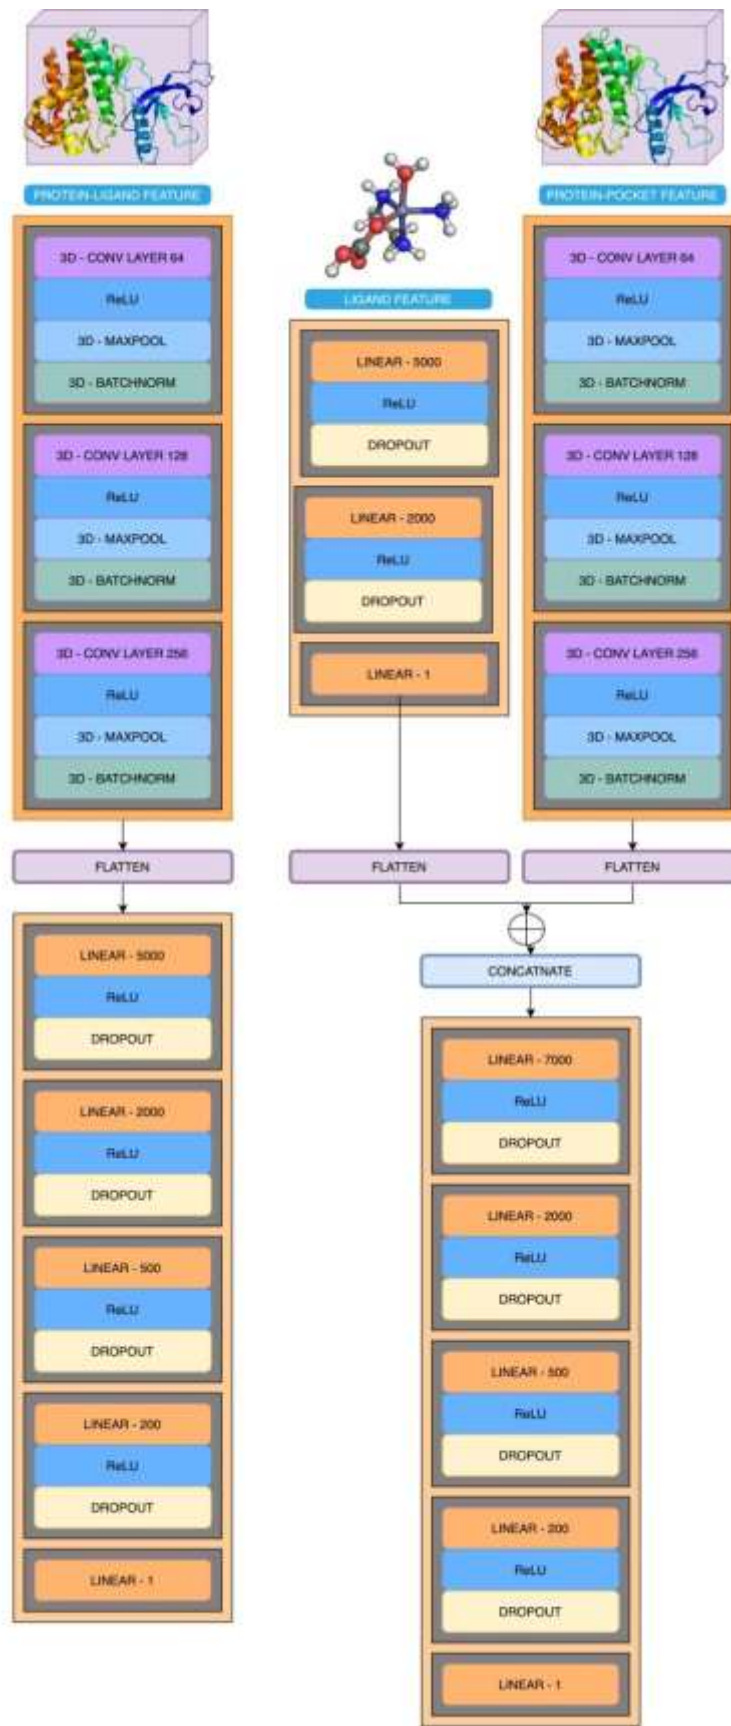

(a) Atomic Model Network

(b) Complex Model Network

Appendix\_Figure A1: Network layout for models.

**Appendix\_Table B1: Hyperparameters in Composite Model**

| <b>Hyper Parameter</b>      |                      |                    |                |
|-----------------------------|----------------------|--------------------|----------------|
| <b>Protein Layer</b>        | <b>Channels</b>      | <b>Filter size</b> | <b>Padding</b> |
| Conv3D                      | 64                   | 5                  | 3              |
| ReLU                        | 0                    | 0                  | 0              |
| MaxPool3D                   | 0                    | 3                  | 1              |
| Conv3D                      | 128                  | 5                  | 3              |
| ReLU                        | 0                    | 0                  | 0              |
| MaxPool3D                   | 0                    | 3                  | 1              |
| BatchNorm3D                 | 128                  | 0                  | 0              |
| Conv3D                      | 256                  | 3                  | 1              |
| ReLU                        | 0                    | 0                  | 0              |
| MaxPool3D                   | 0                    | 3                  | 1              |
| BatchNorm3D                 | 256                  | 0                  | 0              |
| <b>Ligand Layer</b>         |                      |                    |                |
| <b>Layers</b>               | <b>Neurons</b>       |                    |                |
| Linear                      | 7000                 |                    |                |
| ReLU                        | 0                    |                    |                |
| Dropout                     | 0.5                  |                    |                |
| Linear                      | 5000                 |                    |                |
| ReLU                        | 0                    |                    |                |
| Dropout                     | 0.5                  |                    |                |
| Linear                      | 2000                 |                    |                |
| ReLU                        | 0                    |                    |                |
| <b>Regressor layer</b>      |                      |                    |                |
| <b>Layers</b>               | <b>Neurons</b>       |                    |                |
| Linear                      | 7000                 |                    |                |
| ReLU                        | 0                    |                    |                |
| Dropout                     | 0.5                  |                    |                |
| Linear                      | 2000                 |                    |                |
| ReLU                        | 0                    |                    |                |
| Dropout                     | 0.5                  |                    |                |
| Linear                      | 500                  |                    |                |
| ReLU                        | 0                    |                    |                |
| Dropout                     | 0.5                  |                    |                |
| Linear                      | 200                  |                    |                |
| ReLU                        | 0                    |                    |                |
| Dropout                     | 0.5                  |                    |                |
| Linear                      | 1                    |                    |                |
| <b>Optimizer Parameters</b> |                      |                    |                |
| <b>Optimizer</b>            | <b>Learning Rate</b> | <b>Momentum</b>    |                |
| Adam                        | 0.001                | 0.99               |                |
| Batch Size                  | 28                   | -                  |                |

**Appendix C**

**Training curve of composite model:**

## Mean Square Error vs Epochs

Training curve for 20 epochs

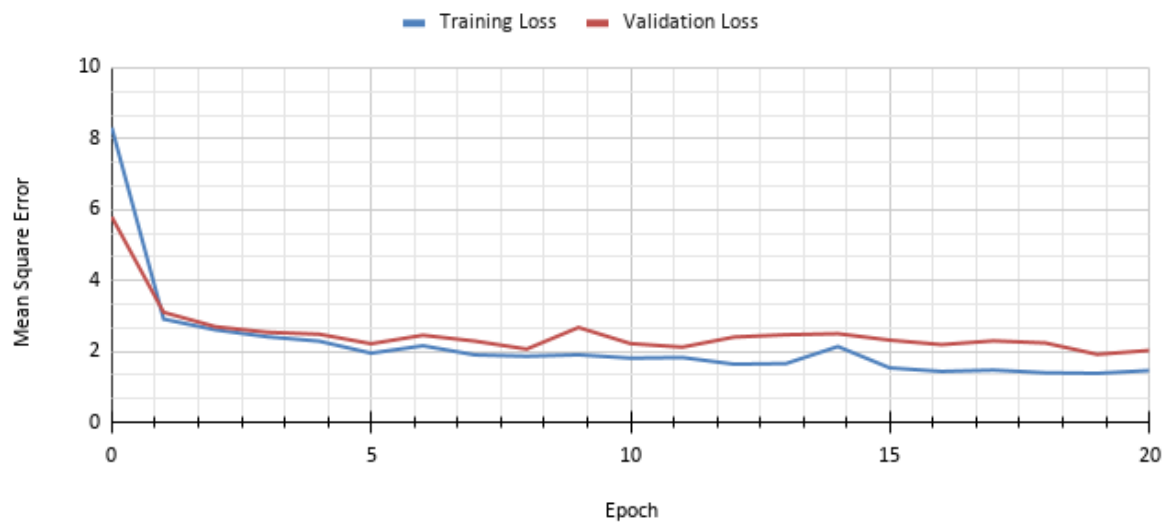

**Appendix\_Figure C1: Hyperparameters in Composite Model**

## Appendix D

### DEELIG performance on Kinases dataset

Protein-ligand complexes used have been presented in the format ‘\$PDB-ID\_\$Ligand-ID\_\$Chain-ID\_\$Atom-number’. Here, the ligand ID (Ligand-ID) is as obtained from PDB and ‘Atom-number’ indicates the atom number at which ligand is bound to the protein structure.

**Appendix\_Table D1: Performance of DEELIG on kinases**

| <b>PDB ID</b>   | <b>Ground Truth<br/>(-log (kd/ki))</b> | <b>Predicted<br/>(-log (kd/ki))</b> | <b>Set</b> |
|-----------------|----------------------------------------|-------------------------------------|------------|
| 1ATP_ATP_E_355  | 14.33                                  | 10.162511                           | training   |
| 1B38_ATP_A_381  | 12.89                                  | 11.011607                           | training   |
| 1B39_ATP_A_381  | 13.64                                  | 10.672279                           | training   |
| 1BX6_BA1_A_351  | 16.88                                  | 17.481277                           | training   |
| 1KV1_BMU_A_391  | 11.34                                  | 11.811321                           | training   |
| 1PXJ_CK2_A_500  | 8.11                                   | 8.140871                            | training   |
| 1Q8T_Y27_A_930  | 9.22                                   | 8.202146                            | training   |
| 1Q8U_H52_A_961  | 12.6                                   | 14.963462                           | training   |
| 1Q8U_H52_A_962  | 12.6                                   | 12.837863                           | training   |
| 1Q8W_M77_A_960  | 11.05                                  | 13.436903                           | training   |
| 1R0E_DFN_A_702  | 20.73                                  | 18.322815                           | training   |
| 1R0E_DFN_B_501  | 20.73                                  | 20.813835                           | training   |
| 1TVO_FRZ_A_1001 | 11.68                                  | 14.313412                           | training   |
| 1UNL_RRC_A_1293 | 3.97                                   | 5.2938104                           | training   |
| 1UU3_LY4_A_1374 | 4.97                                   | 12.5554905                          | training   |
| 1XH4_R69_A_351  | 14.9                                   | 10.410368                           | training   |
| 1XH5_R68_A_1001 | 10.29                                  | 11.608167                           | training   |
| 1XWS_BI1_A_1001 | 16.12                                  | 15.265529                           | training   |
| 1YDT_IQB_E_351  | 14.51                                  | 11.634923                           | training   |
| 2BAK_AQZ_A_401  | 14.81                                  | 13.099378                           | training   |
| 2C5O_CK2_A_1297 | 8.11                                   | 4.862343                            | training   |
| 2C5O_CK2_C_1298 | 8.11                                   | 5.131049                            | training   |



|                 |       |           |          |
|-----------------|-------|-----------|----------|
| 2EWA_SB2_A_361  | 15.98 | 13.587485 | training |
| 2F2U_M77_A_501  | 14.07 | 10.874512 | training |
| 2F2U_M77_B_1501 | 14.07 | 12.677324 | training |
| 2J2I_LY4_B_1307 | 5.92  | 9.034196  | training |
| 2NPQ_BOG_A_1000 | 10.39 | 10.77333  | training |
| 2NPQ_BOG_A_2000 | 10.39 | 9.395628  | training |
| 2O3P_QUE_A_501  | 15.21 | 11.99402  | training |
| 2O63_MYC_A_501  | 11.77 | 10.327488 | training |
| 2O64_MYU_A_501  | 12.6  | 15.132906 | training |
| 2QHM_7CS_A_500  | 11.93 | 15.419877 | training |
| 2RIO_ADP_A_1101 | 8.5   | 8.839855  | training |
| 2RIO_ADP_B_2101 | 8.5   | 8.12286   | training |
| 2RKU_R78_A_500  | 17.33 | 17.202715 | training |
| 2UZT_SS3_A_1351 | 13.93 | 10.50961  | training |
| 2VU3_LZE_A_1299 | 15.02 | 11.712693 | training |
| 2WTV_ZZL_A_1390 | 16.48 | 14.356284 | training |
| 2WTV_ZZL_B_1390 | 16.48 | 14.618113 | training |
| 2XJ2_985_A_1001 | 14.24 | 13.576728 | training |
| 2Y7J_B49_A_1294 | 9.74  | 8.980873  | training |
| 2Y7J_B49_B_1294 | 9.74  | 10.673288 | training |
| 2Y7J_B49_C_1294 | 9.74  | 8.560607  | training |
| 2Y7J_B49_D_1294 | 9.74  | 5.335432  | training |
| 2YIW_YIW_A_1353 | 19.34 | 12.520471 | training |
| 2YIX_YIX_A_1355 | 17.23 | 14.783937 | training |
| 2ZB1_GK4_A_361  | 12.25 | 11.635828 | training |
| 3AMA_SKE_A_351  | 9.22  | 6.7474203 | training |
| 3AMB_VX6_A_351  | 9.22  | 11.450221 | training |
| 3AT4_CCK_A_336  | 17.61 | 16.972866 | training |
| 3BWJ_ARX_A_352  | 12.66 | 10.589522 | training |
| 3D0E_G93_A_1    | 17.04 | 12.532833 | training |

|                |       |            |          |
|----------------|-------|------------|----------|
| 3D0E_G93_B_2   | 17.04 | 17.183178  | training |
| 3DDQ_RRC_A_299 | 12.9  | 8.297859   | training |
| 3DDQ_RRC_C_299 | 12.9  | 7.178257   | training |
| 3E5A_VX6_A_500 | 17.73 | 12.699175  | training |
| 3EQG_4BM_A_1   | 14.99 | 9.964328   | training |
| 3FC1_52P_X_362 | 10.49 | 10.373807  | training |
| 3FLS_FLS_A_361 | 18.24 | 13.88539   | training |
| 3FLW_FLW_A_361 | 18.16 | 16.465137  | training |
| 3FSK_RO6_A_450 | 14.96 | 13.170166  | training |
| 3GCP_SB2_A_361 | 15.72 | 12.1016035 | training |
| 3GCS_BAX_A_401 | 5.6   | 6.2856894  | training |
| 3GCU_R48_B_401 | 13.32 | 12.8222475 | training |
| 3GCV_SS6_A_361 | 14.12 | 12.847186  | training |
| 3GNI_ATP_B_1   | 15.43 | 9.653784   | training |
| 3GP0_NIL_A_1   | 14.84 | 18.384321  | training |
| 3HEC_STI_A_1   | 9.22  | 8.287979   | training |
| 3HEG_BAX_A_1   | 5.6   | 7.008605   | training |
| 3HMO_STU_A_1   | 15.01 | 12.163776  | training |
| 3HP5_52P_A_401 | 10.49 | 10.918285  | training |
| 3HV6_R39_A_361 | 12.72 | 9.466206   | training |
| 3IW5_DF3_A_362 | 11.69 | 9.562438   | training |
| 3IW6_PP0_A_361 | 10.33 | 7.345064   | training |
| 3IW8_HIZ_A_361 | 8.92  | 9.450232   | training |
| 3JVS_AGY_A_900 | 13.44 | 14.485944  | training |
| 3L8S_BFF_A_361 | 13.83 | 12.68417   | training |
| 3L8X_N4D_A_361 | 16.12 | 14.4477    | training |
| 3LFA_1N1_A_361 | 8.22  | 9.860175   | training |
| 3MYG_EML_A_1   | 22.34 | 17.777912  | training |
| 3NPC_B96_A_365 | 9.53  | 10.554703  | training |
| 3NPC_B96_B_365 | 9.53  | 8.5307665  | training |

|                 |       |           |          |
|-----------------|-------|-----------|----------|
| 3O8P_BMU_A_361  | 11.34 | 10.370246 | training |
| 3O8U_BMU_A_361  | 11.34 | 9.472248  | training |
| 3OBJ_BMU_A_361  | 11.34 | 11.657911 | training |
| 3PG3_DG7_A_362  | 11.01 | 13.260027 | training |
| 3PXF_2AN_A_304  | 7.91  | 8.43764   | training |
| 3PXQ_2AN_A_300  | 7.91  | 8.458857  | training |
| 3PXQ_2AN_A_301  | 7.91  | 7.9644737 | training |
| 3PXQ_2AN_A_302  | 7.91  | 7.834199  | training |
| 3PXZ_2AN_A_299  | 7.91  | 6.5781374 | training |
| 3PXZ_JWS_A_301  | 9.74  | 7.590602  | training |
| 3PY1_2AN_A_301  | 7.91  | 6.6630545 | training |
| 3PY1_2AN_A_302  | 7.91  | 7.0281353 | training |
| 3PY1_SU9_A_300  | 13.56 | 13.19573  | training |
| 3RGF_BAX_A_465  | 5.78  | 8.478868  | training |
| 3SW7_19K_A_299  | 9.76  | 12.033982 | training |
| 3TZM_085_A_1    | 6.27  | 13.889732 | training |
| 3UBD_SL0_A_400  | 10.45 | 11.020773 | training |
| 3UO4_0C0_A_1    | 12.73 | 12.905641 | training |
| 3UOL_0C7_A_2    | 15.54 | 13.293035 | training |
| 3UOL_0C7_B_1    | 15.54 | 14.602809 | training |
| 3VQH_IQB_A_401  | 15.29 | 15.187998 | training |
| 3VVH_4BM_B_503  | 14.99 | 13.505534 | training |
| 3VVH_4BM_C_503  | 14.99 | 15.487566 | training |
| 3ZSH_469_A_400  | 19.12 |           | training |
| 3ZSI_52P_A_1000 | 10.49 | 7.871111  | training |
| 4BCQ_TJF_C_1295 | 13.44 | 12.84407  | training |
| 4BTK_DTQ_A_1337 | 12.95 | 9.336148  | training |
| 4CRL_C1I_A_1360 | 20.06 | 15.915939 | training |
| 4DLI_IRG_A_401  | 10.64 | 9.909659  | training |
| 4DLI_IRG_A_402  | 10.64 | 11.62527  | training |

|                 |       |            |          |
|-----------------|-------|------------|----------|
| 4EK6_10K_A_301  | 9.92  | 10.227652  | training |
| 4EZ7_2AN_A_302  | 7.91  | 7.93563    | training |
| 4EZ7_2AN_A_303  | 7.91  | 6.879238   | training |
| 4F9Y_GG5_A_401  | 12.03 | 14.077505  | training |
| 4F9Y_GG5_A_402  | 12.03 | 12.441417  | training |
| 4F9Y_LM3_A_403  | 13.21 | 10.422124  | training |
| 4FKI_09K_A_301  | 7.45  | 10.119772  | training |
| 4FKL_CK2_A_300  | 8.11  | 7.9371223  | training |
| 4FKO_20K_A_301  | 7.84  | 8.178918   | training |
| 4FKU_60K_A_301  | 12.39 | 9.98849    | training |
| 4FKU_60K_A_303  | 12.39 | 14.65224   | training |
| 4GUE_QCT_A_401  | 9.76  | 10.720871  | training |
| 4I3Z_ADP_A_301  | 0.67  | 5.0668316  | training |
| 4I3Z_ADP_C_301  | 0.67  | 6.001342   | training |
| 4I5M_R78_A_401  | 18.65 | 21.034546  | training |
| 4JBQ_VX6_A_501  | 17.73 | 14.951972  | training |
| 4KS8_B49_A_701  | 3.73  | 7.098278   | training |
| 4L9I_8PR_A_601  | 8.95  | 12.205049  | training |
| 4L9I_8PR_B_601  | 8.95  | 10.86388   | training |
| 4LOO_SB4_A_401  | 16.48 | 16.590876  | training |
| 4LOP_SB4_A_401  | 16.48 | 16.209667  | training |
| 4LOP_SB4_B_401  | 16.48 | 14.673704  | training |
| 4LOP_SB4_C_401  | 16.48 | 14.650061  | training |
| 4LOP_SB4_D_401  | 16.48 | 14.583004  | training |
| 4LOQ_SB4_A_401  | 16.48 | 15.305688  | training |
| 4LOQ_SB4_B_401  | 16.48 | 12.504713  | training |
| 4LOQ_SB4_C_401  | 16.48 | 13.820618  | training |
| 4OTI_MI1_A_1001 | 13.13 | 12.5323515 | training |
| 4QMN_DB8_A_401  | 11.62 | 14.84667   | training |
| 4QMZ_B49_A_401  | 5.69  | 6.55925    | training |

|                |       |           |          |
|----------------|-------|-----------|----------|
| 4QP2_36R_A_401 | 4.67  | 7.273883  | training |
| 4QTA_38Z_A_411 | 15.86 | 13.754637 | training |
| 4QTB_38Z_A_418 | 13.99 | 12.003158 | training |
| 4QTB_38Z_B_412 | 13.99 | 11.510162 | training |
| 4QTE_390_A_430 | 17.73 | 13.258313 | training |
| 4QYY_3G7_A_401 | 14.51 | 10.219946 | training |
| 4TXC_38G_A_301 | 12.95 | 11.588561 | training |
| 4U43_3D8_A_401 | 7.65  | 5.3566923 | training |
| 4X21_3WH_A_501 | 14.84 | 11.492774 | training |
| 4X21_3WH_B_501 | 14.84 | 13.035936 | training |
| 4XX9_RF4_A_402 | 9.44  | 8.770052  | training |
| 4Y8D_49J_A_401 | 16.24 | 11.525299 | training |
| 4Y8D_49J_B_401 | 16.24 | 15.099169 | training |
| 4ZJI_40Q_B_601 | 7.83  | 7.283536  | training |
| 4ZJI_40Q_C_601 | 7.83  | 9.089074  | training |
| 4ZJI_40Q_D_601 | 7.83  | 6.8545666 | training |
| 4ZJJ_40R_A_601 | 7.83  | 7.0933084 | training |
| 4ZJJ_40R_B_601 | 7.83  | 8.350812  | training |
| 4ZJJ_40R_C_601 | 7.83  | 5.1687207 | training |
| 4ZJJ_40R_D_601 | 7.83  | 7.2560215 | training |
| 5AJQ_DB8_A_800 | 16.48 | 14.70757  | training |
| 5AJQ_DB8_B_800 | 16.48 | 14.7908   | training |
| 5AUT_2AN_A_301 | 9.62  | 8.227689  | training |
| 5CS6_K82_A_404 | 5.07  | 4.468193  | training |
| 5CS6_K82_A_405 | 5.07  | 5.1155643 | training |
| 5CS6_K82_A_406 | 5.07  | 4.588729  | training |
| 5CS6_K82_A_407 | 5.07  | 4.937118  | training |
| 5CSH_54E_A_401 | 5.92  | 5.2921076 | training |
| 5CSH_54E_A_402 | 5.92  | 7.947792  | training |
| 5CSH_54E_B_403 | 5.92  | 5.49813   | training |

|                |       |           |          |
|----------------|-------|-----------|----------|
| 5CSH_54E_B_404 | 5.92  | 6.6865587 | training |
| 5CSP_54G_A_401 | 7.46  | 6.192384  | training |
| 5CU3_54S_A_404 | 12.66 | 16.073565 | training |
| 5CU3_54S_B_403 | 12.66 | 9.69426   | training |
| 5CU4_54S_A_404 | 12.66 | 12.544091 | training |
| 5DN3_5DN_A_402 | 10.19 | 7.8209085 | training |
| 5DR9_SKE_A_401 | 6     | 7.5168114 | training |
| 5DRB_5FJ_A_501 | 17.11 | 14.781893 | training |
| 5DT0_SKE_A_401 | 6     | 5.988515  | training |
| 5JQ5_I74_A_302 | 10.67 | 13.649733 | training |
| 5L4Q_LKB_A_401 | 14.46 | 12.602347 | training |
| 5L4Q_LKB_B_401 | 14.46 | 14.451378 | training |
| 5MO8_C98_A_404 | 11.02 | 11.826718 | training |
| 5MO8_C98_B_401 | 11.02 | 11.957595 | training |
| 5MOD_86L_A_404 | 5.81  | 5.3589926 | training |
| 5MOE_OQC_A_409 | 5.3   | 4.6797047 | training |
| 5MOE_OQC_A_410 | 5.3   | 5.384391  | training |
| 5MOE_OQC_A_411 | 5.3   | 6.2392187 | training |
| 5MOE_OQC_B_409 | 5.3   | 6.606739  | training |
| 5MRB_C5N_A_901 | 12.27 | 16.349714 | training |
| 5MTX_FJI_A_401 | 15.55 | 13.412746 | training |
| 5MTY_HB9_A_401 | 18.16 | 13.793211 | training |
| 5TBE_78L_A_401 | 16.94 | 19.41852  | training |
| 5TE0_XIN_A_401 | 14.28 | 14.470296 | training |
| 5TF9_7AV_A_501 | 10.04 | 7.720195  | training |
| 5VC3_DB8_A_601 | 14.08 | 16.318983 | training |
| 5VC4_XZN_A_601 | 14.65 | 10.742605 | training |
| 5VC5_96M_A_601 | 16.03 | 12.171665 | training |
| 5VC6_P48_A_601 | 15.82 | 14.553338 | training |
| 5VCV_1N1_A_404 | 15.72 | 9.767446  | training |

|                 |       |           |            |
|-----------------|-------|-----------|------------|
| 5VCW_93J_A_401  | 4.51  | 5.9813185 | training   |
| 5VCW_93J_B_401  | 4.51  | 4.4235907 | training   |
| 5VCZ_XZN_A_401  | 12.33 | 13.311826 | training   |
| 5VD0_8X7_A_401  | 12.64 | 13.869585 | training   |
| 5VD1_P48_A_401  | 11.53 | 17.269943 | training   |
| 5VD3_H8H_A_401  | 10.48 | 12.441893 | training   |
| 1PY5_PY1_A_700  | 16.82 | 14.969334 | validation |
| 1XH7_R96_A_351  | 13.42 | 14.521075 | validation |
| 1XH9_R69_A_351  | 15.59 | 11.105695 | validation |
| 2A4L_RRC_A_300  | 3.39  | 6.7256346 | validation |
| 2FVD_LIA_A_299  | 19.12 | 15.857263 | validation |
| 2UZW_SS4_E_1351 | 16.82 | 13.931561 | validation |
| 2WTV_ZZL_D_1390 | 16.48 | 16.501717 | validation |
| 3BWJ_ARX_A_351  | 12.66 | 10.008118 | validation |
| 3GCQ_1BU_A_401  | 12.59 | 17.14584  | validation |
| 3GCU_R48_A_401  | 13.32 | 11.107234 | validation |
| 3GI3_B10_A_391  | 17.84 | 15.133845 | validation |
| 3HMP_CX4_A_1    | 10.34 | 7.4939575 | validation |
| 3HUB_469_A_361  | 19.12 | 14.843432 | validation |
| 3HUC_G97_A_362  | 11.49 | 10.609373 | validation |
| 3LFF_Z83_A_362  | 13.15 | 12.004912 | validation |
| 3O8T_BMU_A_361  | 11.34 | 10.189346 | validation |
| 3PXF_2AN_A_305  | 7.91  | 9.076647  | validation |
| 3PXZ_2AN_A_300  | 7.91  | 6.3745623 | validation |
| 3SW4_18K_A_299  | 9.95  | 14.080001 | validation |
| 3U9N_09H_A_301  | 13.82 | 11.017376 | validation |
| 3UVQ_FS8_A_361  | 15.59 | 11.264186 | validation |
| 3VVH_4BM_A_703  | 14.99 | 12.857493 | validation |
| 4BCQ_TJF_A_1296 | 13.44 | 12.502231 | validation |
| 4BTJ_ATP_B_1338 | 8.3   | 10.083336 | validation |

|                 |       |            |            |
|-----------------|-------|------------|------------|
| 4KKH_1RQ_A_501  | 14.6  | 17.964321  | validation |
| 4LOQ_SB4_D_401  | 16.48 | 22.440546  | validation |
| 4NJ3_2KD_A_301  | 12.72 | 11.144922  | validation |
| 4QMS_1N1_A_401  | 3.97  | 8.428536   | validation |
| 4QMU_SKE_A_401  | 5.63  | 5.1778917  | validation |
| 4ZJI_4OQ_A_601  | 7.83  | 5.5979853  | validation |
| 5DIJ_56H_A_4000 | 14.79 | 12.7819    | validation |
| 5DPV_SKE_A_402  | 6     | 7.86001    | validation |
| 5LVL_537_A_401  | 11.29 | 10.439565  | validation |
| 5MOE_OQC_B_408  | 5.3   | 6.949047   | validation |
| 5V5Y_8X7_A_601  | 15.83 | 15.258941  | validation |
| 5VCY_DB8_A_401  | 12.83 | 14.903077  | validation |
| 1KE9_LS5_A_299  | 10.95 | 10.35851   | test       |
| 1XH6_R94_A_351  | 14.55 | 14.093109  | test       |
| 2BAJ_1PP_A_401  | 17.04 | 12.874502  | test       |
| 2BAL_PQA_A_401  | 12.23 | 12.644074  | test       |
| 2WTV_ZZL_C_1392 | 16.48 | 13.081798  | test       |
| 2XJ1_XJ1_A_1307 | 15.09 | 12.160637  | test       |
| 3FLN_3FN_C_361  | 20.04 | 13.301807  | test       |
| 3HRF_P47_A_1374 | 9.19  | 9.049356   | test       |
| 3HV7_1AU_A_361  | 15.94 | 10.493131  | test       |
| 3LFE_Z84_A_361  | 12.05 | 12.960303  | test       |
| 3TI1_B49_A_299  | 9.22  | 9.492598   | test       |
| 4EK8_16K_A_301  | 10.04 | 11.950938  | test       |
| 4FKP_LS5_A_301  | 10.95 | 11.706519  | test       |
| 4FKW_62K_A_301  | 13.95 | 14.523321  | test       |
| 5TCO_79Q_A_401  | 17.28 | 12.303295  | test       |
| 5TF9_7AV_B_501  | 10.04 | 10.4065275 | test       |
