# Supplementary material for: DEELIG: A Deep Learning Approach to Predict Protein-Ligand Binding Affinity
Source: PubMed Central journal article supplement — Bioinform Biol Insights. 2021 Jul 7;15:11779322211030364. doi: 10.1177/11779322211030364 (PMC8274096; doi:10.1177/11779322211030364), 2021-07-07
Supplement: sj-pdf-2-bbi-10.1177_11779322211030364.pdf [file sj-pdf-2-bbi-10.1177_11779322211030364.pdf]

## SM\_File1: Clustering as a measure of ligand diversity in DEELIG

**SM\_Table 1.1:** Ligand clusters as a measure of ligand diversity in DEELIG. Hierarchical clustering of unique ligands used in training DEELIG was performed on the basis of physicochemical properties. Each of the 125 clusters is represented by a cluster ID and corresponding ligands as members. These ligands are part of training DEELIG, and have been represented by ligand ID from RCSB PDB. Cluster centroid (in **bold**) obtained was assigned as the cluster representative.

| Cluster ID | Cluster members                                                                                                                                                                                                                      |
|------------|--------------------------------------------------------------------------------------------------------------------------------------------------------------------------------------------------------------------------------------|
| 1          | COA,4CO,MYA,RFC,CAO, <b>ACO</b> ,MC4,0ET,1HA,UCA,CAA,MLC,WCA,5F9,IVC                                                                                                                                                                 |
| 2          | <b>NAD</b> ,NAP,A3D,NHD,DND,ZID,NAD,8ID                                                                                                                                                                                              |
| 3          | <b>NDP</b> , <b>NAI</b>                                                                                                                                                                                                              |
| 4          | ADP,ATP,A4P,ACP,APC,APR,PAX,ANP,A3P,AMP,ODP,A2P,FAO,TXP,AQP,TXD,TM1,M33,12D,CMP,AGS,T5A,V3L,A1R,2BA,A22,ADX,BTX, <b>AP5</b> ,DTP,2AM,Z5A                                                                                             |
| 5          | SAM,SAH,ADN,SON,NOS,SFG,KAA,52H,53H,54H,3BH,M24,A4D,A5D,A6D,A7D,3F5,8OX,A3S,A3T,A3G,DSH,J1A,J1C,J1D,0UM,SAH,3NZ,VRT,SO8,A2H,67D,6CE, <b>ADN</b> ,75G,KB1                                                                             |
| 6          | NIA,3BK,3FD,3GO,AIR,3P1,TO1,N5P,AW1,0QK,AW2,7CH,SGV,GB8, <b>7DT</b>                                                                                                                                                                  |
| 7          | GDP,GNH,2GP,GTP,GNP,MGP,GMP,IMP, <b>5GP</b> ,DGP,GNG,GSP,01G,C2E,MGO,MGQ,MGV,GTA,GTG,G4P,2GP,GFB,1SY,PCG,1YC,1YD,PCG,4UR,5O8,6CK,C2E,6SW,6SX,6SZ                                                                                     |
| 8          | TPG, <b>MGT</b> ,M7M,M7G                                                                                                                                                                                                             |
| 9          | DCM,TMP,UFP,8HG,8DA,1AA,2AA,8OG,F01, <b>CAR</b> ,829,T3P,AO9,NOH,CTN,5UD,5AE,CTP,CC7                                                                                                                                                 |
| 10         | UMP,UDP,DUP,DUD,UC5, <b>U5P</b> ,UDM,DUT,UPG,44P,DUR,2TU,UD1,URI,2KH,U3P,Y6W,DU5,6SY                                                                                                                                                 |
| 11         | G6P,G3P, <b>A5P</b> ,TA6,G16,X1P,RP5,FDP,FBP,PRP,G1P,F1X,FRU,F1P,1FT,S7P,ALX,T6P,LAO                                                                                                                                                 |
| 12         | 13P,S3P,PAI,137,DXP,MOD, <b>6PG</b> ,CAP,HPF,SC1,F6F,F19,F9F,ICR,3PG,GG9,R5P,PGH,TPO,PEQ,P6T,OPE,TD4,PGA,D5X,D8X                                                                                                                     |
| 13         | 4IP,I3P, <b>I5P</b> ,ITP,IHP                                                                                                                                                                                                         |
| 14         | PIB, <b>DB4</b> ,PIZ,PBU                                                                                                                                                                                                             |
| 15         | A2G,CTO,NLC,BDZ,NGA, <b>NLC</b> ,16G,8VZ                                                                                                                                                                                             |
| 16         | A24,1DM,LEC, <b>147</b> ,HNW,HNV,FVQ,FYZ,J73,CWX,3XO,3X8,4J0,4J9,6Y2                                                                                                                                                                 |
| 17         | BLM,MGS,233,233,BDD,IFM,DAN,SIA,OXZ,SMD,MLD,ODI,XUL,NOY,GOX,TTZ,PAF,DIH,NOK,OAN,NHT,STZ,NGT,GOL,MBG,GC2,LTM,PAU,TRS,MU2, <b>TDG</b> ,DQT,MQT,MN0,PGZ,GS9,IFL,NGW,70B,YO5,GRX,PK9,AO3,ASC,ETF,423,425,DCL,SLT,X6X,MO0,SNW,7K2,KIF,8MP |
| 18         | TD2, <b>5KS</b> ,5KT,TGZ                                                                                                                                                                                                             |
| 19         | FCA,ACR,RIP,SMS,ACR,GET,RIP,NOJ,RNS,MFU,CTS,CGB,AB0,B19,AZF,VDM,QPU,KDB,KDR,UNG,GCU,SFU,FHN,XBK,DFU,ENE,END,ZWZ,KDA,TOR,KDO,KO2,TXT,SCR,IHS,INS,H1S,3S6,SIS, <b>5GO</b> ,EDG,9QZ                                                     |
| 20         | GIM,PGI,NTZ,GI1,GI2,GI3,GI4, <b>MVL</b>                                                                                                                                                                                              |
| 21         | DEG,BOG,AFO,FK9,XNS, <b>KGM</b>                                                                                                                                                                                                      |
| 22         | <b>SUC</b> ,RAF,DQR,FNY                                                                                                                                                                                                              |
| 23         | GAL,BCD,GAL,LAT,MAN,MAL,GYP,XLM,ARW,MLR,GZL,ACX,MLB,LAT,RGG, <b>MTT</b> ,LAT,MLR,4CQ,RCD,BCD,LAT                                                                                                                                     |
| 24         | PUT,ACA,AMH,GUA, <b>SIN</b> ,TSA,DMG,HXA,FA1,KAI,SPD,BET,PBE,DHK,CXP,CIT,XAP,H01,TF4,4CS,6CS,LY5,LMR,7HE,GA4,GPF,ABU,SF8,SAR,GIX,5AB,4U7,FB6,03H,BUA,MZT,RUJ,G8M,QIC,164,GA3,XA2,X7A,011,4XW,522,A9H,IPM,QZQ,21G                     |
| 25         | BES,140,MCO,GSH,HAL,DOR,GTX, <b>PCA</b> ,LEH,YBY,GDS,MHI,F42,QEG,GHE,N8P,LZ6,2VE,2VD                                                                                                                                                 |
| 26         | <b>FOL</b> ,MTX,D16,MS1,F89,DHF,C2F,GHW,0J2,0J4,0J5,Z25,04J,MT1                                                                                                                                                                      |
| 27         | FLA,ABH,PSQ,S2C,ORN,CBH,QUS,ABH,4TB,DGL,MLZ,MLY,DSN,6HN,NNH,HAR,LN7,LN6, <b>API</b> ,3ZA,2W2,DAL,RPI,6DB,TIH                                                                                                                         |
| 28         | AMQ,T44,T3, <b>IYR</b> ,4ZK,E42,DPN                                                                                                                                                                                                  |
| 29         | ACD,OLA,STE,VCA,PLM, <b>DAO</b> ,PAM,DKA,OCA,MYR,DCR                                                                                                                                                                                 |
| 30         | <b>BTN</b> ,BTN,IMI,IMI,KYT,DTB,ZOF,B1R                                                                                                                                                                                              |

| Cluster ID | Cluster members                                                                                                                                                                                                                                                                                                                                                                                                                   |
|------------|-----------------------------------------------------------------------------------------------------------------------------------------------------------------------------------------------------------------------------------------------------------------------------------------------------------------------------------------------------------------------------------------------------------------------------------|
| 31         | BS5,44K,44M,590,44L,594,44N,44O,44Q,44R                                                                                                                                                                                                                                                                                                                                                                                           |
| 32         | 5B3,1TM,KTJ,KTK,1CQ,69M,69W,69S,69R,69U                                                                                                                                                                                                                                                                                                                                                                                           |
| 33         | BPY,BP3,IPH,3CH,3FA,ANF,43M,BZX,RCO,EMO,CAQ,IOL,BML,4CH,FPN,03V,1NP,BP7,PV2,PV8,PV0,ERH,HQE,6X8,6JD                                                                                                                                                                                                                                                                                                                               |
| 34         | STL,BHQ,2OH,TOH,OHT,ETY,G50,NAR,2DL,C0Y,AEF,AEH,AED,PFL,DIE,IP0,2MY,RE2,JZ0,JZ1,JZ2,JZ4,261,JTH,JWS,AZB,MLO,EOL,LDP,N7I,HC4,2LP,1G4,1OM,MCT,EKZ,DFL,XX9,LNR,NVS                                                                                                                                                                                                                                                                   |
| 35         | QUE,MYC,MYU,GEN,SL0,AGI,57D,KMP,LU2,QCT,FSE,7LU,6B5                                                                                                                                                                                                                                                                                                                                                                               |
| 36         | STI,5MP,ZY5,ZY7,XDK,3AP,NCT,NIL,706,3QO,0QA,3D4,3D5,3D2,RH2,3D8,TQL,LKB,7M2,8HH                                                                                                                                                                                                                                                                                                                                                   |
| 37         | 6XC,78J,YEJ,YD3                                                                                                                                                                                                                                                                                                                                                                                                                   |
| 38         | LY2,7NI,PY1,H52,M77,KSA,L08,FRZ,LY4,BII,WAI,CL3,IQB,IYZ,SB2,7NH,3,P34,SS3,SS4,P83,VGH,646,GD9,XJ1,985,4F8,4FY,YKI,DEQ,CCK,SX8,HC7,HC6,STU,G97,1SQ,3YY,Q6W,M61,3RH,3RU,DIW,03M,B29,913,Z5P,TB7,LZ1,8DQ,C11,0J0,IRG,GG5,LM3,TDH,YS4,1ER,AJ4,AJ5,AJ6,AJ7,18F,1M1,1M0,17X,1RQ,X6K,SB4,2GQ,40B,31V,30M,38G,3C5,X6W,BK9,3WH,4L2,92O,CWC,M1W,BMF,539,5D1,5RO,5WS,O82,O83,O80,RX8,68M,68J,68K,6BS,6B3,6DP,6U5,7W4,7VP,88J,86J,8DV,DQX,BZE |
| 39         | TK4,2AN,ANC,DSO,MNS,C4H,11D,5NS,FNA                                                                                                                                                                                                                                                                                                                                                                                               |
| 40         | COU,8MO,8CM,XCG,EVD,03T,SE2,AKH,BZF                                                                                                                                                                                                                                                                                                                                                                                               |
| 41         | FIP,PRL,IOP,3IB,TSS,SRO,7L4,11S,5H1,G3E,ES1,ES5,ET,0QY,MQN,39R,FK1,AO,DTR,5SG,ITW,A7W,6VD,14O,7W1,IND                                                                                                                                                                                                                                                                                                                             |
| 42         | 1PP,1AU,1AW,1BU,R48,SS6,R39,Z84,Z83,B96,DG7,K9Y,KAO                                                                                                                                                                                                                                                                                                                                                                               |
| 43         | BZI,HAN,VGF,AX7,ES7,ES9,ES0,VGD,ET2,1M2,CPZ,6RQ,7WA                                                                                                                                                                                                                                                                                                                                                                               |
| 44         | CKR,2WU,2YM,2YO,SAQ,SQO                                                                                                                                                                                                                                                                                                                                                                                                           |
| 45         | PH2,LG3,7IG,LGA,A13,V15,LZJ,LZK,TOP,C0P,B2K,B2L,B2T,B2X,B56,EV0,3RP,VHA,VHC,VHE,WHA,MUJ,CP6,TXW,43U,43S,XOJ,6GH,6GF,6GM,7WG                                                                                                                                                                                                                                                                                                       |
| 46         | CK2,18K,19K,16K,20K                                                                                                                                                                                                                                                                                                                                                                                                               |
| 47         | 1N9,R78,627,P4T,GUI,AM0,AM9,HT1,585,27A,HI0,NP7,RLI,IA9,R78,2TA,38O,C5N,5XQ,8X7,P48,7ZF,7ZL,7ZO,7Z6,1E9                                                                                                                                                                                                                                                                                                                           |
| 48         | JIN,3FN,FLS,FLW,P17,96M                                                                                                                                                                                                                                                                                                                                                                                                           |
| 49         | 5VY,5VZ,5W0,5W1,5W2                                                                                                                                                                                                                                                                                                                                                                                                               |
| 50         | BER,AVX,833,BBY,SAU,CTI,SGE,1GH,1H2,2K7,2M2,2LO,36Z,37N,3P2,4LD,53W,5SW,5U6                                                                                                                                                                                                                                                                                                                                                       |
| 51         | FMM,AQZ,PFH,CX4,DXQ,E67,E72,DB8,IRE,LEV,DTQ,0N5,1K0,TZN,3ZC,5GD,88Z,XZN,93J,H8H,9HJ,9HG                                                                                                                                                                                                                                                                                                                                           |
| 52         | M0Y,M0Z,1YZ,1E0A                                                                                                                                                                                                                                                                                                                                                                                                                  |
| 53         | 541,ML1,ML2,V5X,IMN,MYI,BZ3,A8D,FG2,FG3,FG4,FG5,FG6,2B5,MS0,QI9,5WD                                                                                                                                                                                                                                                                                                                                                               |
| 54         | DRJ,XCX,ABV,36R,94W,6KT,7FU                                                                                                                                                                                                                                                                                                                                                                                                       |
| 55         | FD1,FD2,FD3,FD4,TL3,TL4,BEN,PNT,BRN,PBZ,JLZ,AZ3,NTN                                                                                                                                                                                                                                                                                                                                                                               |
| 56         | 50U,45U,46U,49U,12U,10U,11U,13U                                                                                                                                                                                                                                                                                                                                                                                                   |
| 57         | 6MG,7AF,6NN,6XO,79F,79E,7GR,7K0                                                                                                                                                                                                                                                                                                                                                                                                   |
| 58         | MK1,XN3,XN1,XN2                                                                                                                                                                                                                                                                                                                                                                                                                   |
| 59         | K57,JE2,075,033,006,JZP,JZQ                                                                                                                                                                                                                                                                                                                                                                                                       |
| 60         | FRA,SPB,Y27,SHH,1CM,CM6,CMW,CM9,RT8,NBB,N4E,AJ1,VAB,WVH,T9H,0S2,0S3,20N,1EB,25S,4YO,5QY,5QX,IQ5,N91,7H1,6DK,8NB                                                                                                                                                                                                                                                                                                                   |

| Cluster ID | Cluster members                                                                                                                                                                                                                                                                                                                                                                                                                                                                                                                                                      |
|------------|----------------------------------------------------------------------------------------------------------------------------------------------------------------------------------------------------------------------------------------------------------------------------------------------------------------------------------------------------------------------------------------------------------------------------------------------------------------------------------------------------------------------------------------------------------------------|
| 61         | 88S,88W, <b>88V</b> ,88N,W7E                                                                                                                                                                                                                                                                                                                                                                                                                                                                                                                                         |
| 62         | 1B0, <b>1ED</b> ,1G7,1G9,1GB,1B0,7HG,78E,78X,838                                                                                                                                                                                                                                                                                                                                                                                                                                                                                                                     |
| 63         | ROC,FAF,RIT,FRG,BLN,HAE,ACM,DR7,RO1,EGD,MGX,AB1,D1R,1UN,E64,2NC,ARX,C1P,REM,44U,BB2,3N6,RSZ,613,NH5,08Y,091,0UE,15U,FCE,KI1,1RD,7AW,OP1,38Z,3G7,3D0,N6L,MRZ,FY8,58W,5T0,5T4,841,5TD,5TO,5WZ,6C5,6C4, <b>EBU</b> ,8T5,7HC,92A                                                                                                                                                                                                                                                                                                                                         |
| 64         | <b>HCI</b> ,PRA,PEA,PBN,AHC,MPP,PPT,5PV,AEG,B40,B41,MBN,PXY,IBP,I2E,88R,WJ1,1WE,PYJ,3H0,N4B,I4B,OXE                                                                                                                                                                                                                                                                                                                                                                                                                                                                  |
| 65         | <b>ABN</b> ,PNZ,PZM,C2B,G00,VXU,VXQ,SW2,91B,7Z3,K82,54E,86L,OQC                                                                                                                                                                                                                                                                                                                                                                                                                                                                                                      |
| 66         | 1DK,12G,1DL,11Y,1D5, <b>1D6</b> ,1D8,1D9,1DE                                                                                                                                                                                                                                                                                                                                                                                                                                                                                                                         |
| 67         | 3HI,4HI,5HI,6HI,7HI, <b>882</b> ,8HI,9HI                                                                                                                                                                                                                                                                                                                                                                                                                                                                                                                             |
| 68         | 0L9,LF2,LF0, <b>4BI</b> ,LF8                                                                                                                                                                                                                                                                                                                                                                                                                                                                                                                                         |
| 69         | 3C4,DHY,4HP,5ON,5UH,5V5,5V6, <b>IO2</b> ,YI6                                                                                                                                                                                                                                                                                                                                                                                                                                                                                                                         |
| 70         | DIF,570,AIC,EOT,CCR,YPA,NLA,DPD,307,GAS,388,393,2C2,LK2,T4B,TOL,LDT,LKM,GUS,BYH,0CR,LIZ,28P,D30,EAA,B72,4D9, <b>G24</b> ,DOY,3RM,GW0,EK8,2B4,6LX,0JD,H1L,1E5,1EK,8PR,1YE,29V,2YB,RF4,XTK,UET,4TX,42O,IEE,L6I,WY1,SBK,70R,VT1                                                                                                                                                                                                                                                                                                                                         |
| 71         | 700,ZEN,434,1N1,5CL,YAN,230,NZA,CRP,LZE,XBV,WSH,EAM,KSF,RO6,BDO, <b>BDJ</b> ,JQ1,08H,08K,0C7,SE5,52C,4VA,1LH,OCZ,0LM,0LL,0LK,0R3,0S6,0Y7,1C1,I29,I18,ZHK,1CY,1WQ,20J,29Q,2KD,2LW,2SW,2TZ,2ZW,36U,390,33R,ZKW,19H,3UD,4B7,4NJ,4NX,4T4,NUT,CKA,5D2,CZE,5OD,5XL,5XK,YIE,XMS,XYX,0PL,NH6,DL3,RRQ,9GD,7AV                                                                                                                                                                                                                                                                 |
| 72         | 5O5,J4K,6J5, <b>YIH</b>                                                                                                                                                                                                                                                                                                                                                                                                                                                                                                                                              |
| 73         | YH5,X6L, <b>YH1</b> ,YH2,YH6,YH3,YH4,5RU,5RV,5RW,5RX,5RY,5RZ                                                                                                                                                                                                                                                                                                                                                                                                                                                                                                         |
| 74         | HPA,IMU,IRP,9HX,URC,DIH,IMH,MTI,HHR,HA1,PIR,9D9, <b>229</b> ,22A,B55,GSY,IM5,5JL                                                                                                                                                                                                                                                                                                                                                                                                                                                                                     |
| 75         | M1A,9PP, <b>ADE</b> ,TDI,ZEA,DF9,BIG,ES4,3MA,4CT,QMQ,ADK,U85,EOI,DX4,YH7,NBR                                                                                                                                                                                                                                                                                                                                                                                                                                                                                         |
| 76         | FMN,FAD,D4T,ORO, <b>RBF</b> ,CFF,PNX,TP6,TSF,JCL,47D,POY,BAU,4WF,HNR,N6A,1VY,390,48I,F49,TDR,HMU,FYU,5NM,5XF,L66,6YA,7M8                                                                                                                                                                                                                                                                                                                                                                                                                                             |
| 77         | <b>UBA</b> ,UBC,UB1,UBF,UBE                                                                                                                                                                                                                                                                                                                                                                                                                                                                                                                                          |
| 78         | PPG,ORX,PE1,PMP, <b>PDD</b> ,PLP,PLS,UEG                                                                                                                                                                                                                                                                                                                                                                                                                                                                                                                             |
| 79         | TDP,VIB, <b>TPP</b> ,TPS,TPU,D7K,8PA,NFM,26G,0YN,XX8,2VY                                                                                                                                                                                                                                                                                                                                                                                                                                                                                                             |
| 80         | FPP,DED,IPE,DP6,GRG,FM0,3PO,H6P,2JA, <b>GPP</b> ,4LR                                                                                                                                                                                                                                                                                                                                                                                                                                                                                                                 |
| 81         | GER,YFE,CTV,YFD,YFB,2TX, <b>SQL</b> ,JH3                                                                                                                                                                                                                                                                                                                                                                                                                                                                                                                             |
| 82         | <b>108</b> ,2VR,2VP,2VZ,2W0,3RB                                                                                                                                                                                                                                                                                                                                                                                                                                                                                                                                      |
| 83         | <b>MAE</b> ,ISC,PEP,CCU,OAA,COI,PYR,2KT,XI7,AKG,OGA,P47,A8S,D1X,KIV,OXM,2H8,KMT,3SW,3T2,5O6,5OO,6ZX,OXD,OTA                                                                                                                                                                                                                                                                                                                                                                                                                                                          |
| 84         | NOV,TFP,BZT,BT3,BPP,BEE,FLU,BRL,RWF,RNP,CBN,DMP,EQU,NH1,OPB,OI1,667,RRC,26D,T1D,HQL,LG4,FL1,UN9,37A,LIX,JJ3,TPV,1PC,TDZ,D26,6AN,WOE,849,YIS,YIW,YIX,575,3F1,I5I,IM4,TH4,LN1,25P,XNC,S45,IX6,J0Z,PP0,D8Y,3TO,3KR,Z80,MS7,LX8,MKY,RSV,09H,34M,0B3,0B4,N1Y,N2Y,0MB,V6F,PW1,NIH,4DC,10K,09K,TZM,0LU,4HV,1EP,1JR,1L7,KKN,1QK,KLV,04G,1MV,YL3,LOC,2CK,24W,2J5,2J6,2J7,2L1,2L2,31W,09L, <b>3A8</b> ,3CR,9X3,HXY,WEF,WF4,3VR,3W1,3XV,43L,4OL,XOC,UL7,ETU,K6K,XEB,JH5,536,XZ8,5FF,5FK,UO1,5KH,73K,GWM,VQ7,6F9,I74,77X,XHA,2AP,8HZ,8NN,2OW,79A,7Q1,7QV,7QS,7R7,7R4,7R1,8FD,9AA |
| 85         | <b>1QE</b> ,H49,1QF,6E5A,H36                                                                                                                                                                                                                                                                                                                                                                                                                                                                                                                                         |

| Cluster ID | Cluster members                                                                                                                                                                                                                                                                                                                                                                                                                                                                                                                                                                                                                              |
|------------|----------------------------------------------------------------------------------------------------------------------------------------------------------------------------------------------------------------------------------------------------------------------------------------------------------------------------------------------------------------------------------------------------------------------------------------------------------------------------------------------------------------------------------------------------------------------------------------------------------------------------------------------|
| 86         | TPF,ZST,LS5,BMU,BNZ,1AN,DMZ,ATC,FID,PYM,DFN,TSN,444,4TZ,4TR,198,FNZ,NQ,FLV,KLN,1MR,SBI,A51,RO5,II2,II4,MIY,B49,XIN,G93,BSU,4BM,4DM,BAX,53A,469,AVR,OLI,HIZ,3TR,Z89,CEL,VOR,OJ8,SU9,QID,919,TDU,42Q,CVI,VWS,54F,93G,L5V,CQE,3PF,ONS,60K,62K,G9L,TQU,TZF,0X3,0XB,4GU,12R,IQK,X2N,1HR,1L5,HRC,2C9,2CQ,2QJ,2RR,Q7M,RV1,VJP,3M6,3R7,3VQ,3VW,3VX,41O,ZBD,3IT,1YN,SFQ,4OQ,4OR,4QF,LQ5,UFV, <b>EB0</b> ,BEA,5TQ,5WC,LVY,7FF,68L,GV0,6HO,6Q8,P4P,6UY,78Y,PKU,LS8,2BG,9EW,JR5,7OV,927,921,0BP,DEN                                                                                                                                                      |
| 87         | P86,NXG,P74, <b>P51</b> ,P96,KMN                                                                                                                                                                                                                                                                                                                                                                                                                                                                                                                                                                                                             |
| 88         | TCL,4BC,43P,PCQ,226,2GG,2GJ, <b>Y10</b> ,Y15,6QM,BZ8,FT1,FT2,9UN,50Q,XKL,PZB,PCI,T6C,B1T,5JC,FGZ                                                                                                                                                                                                                                                                                                                                                                                                                                                                                                                                             |
| 89         | NPE,TAA,9AR,AAH,TNF,PGG,PNF,4NM,CLM,N11,BFF,O73,C56, <b>NPO</b> ,CNI,2ZM,36V,4JT,4NC,6NT,6J1,80R                                                                                                                                                                                                                                                                                                                                                                                                                                                                                                                                             |
| 90         | REA,ETR,RTL, <b>RET</b> ,RNE                                                                                                                                                                                                                                                                                                                                                                                                                                                                                                                                                                                                                 |
| 91         | <b>TLM</b> ,TL6,TLG,7RD,TLH                                                                                                                                                                                                                                                                                                                                                                                                                                                                                                                                                                                                                  |
| 92         | GDM,FKA,FK5,RAP,HYF,TMH,S1A,TG1,SMA,BID,VD5,BC6,BC2, <b>NRB</b> ,1D4,1D2,GYN,GDM,CW1,CY9,BGV,ZGA,Z18,QLE,SM8,0V4,BLD,2UO,SNE,3V4,MY8,6K9                                                                                                                                                                                                                                                                                                                                                                                                                                                                                                     |
| 93         | AZI,FMS,1MC,BCT,BR,DSS,BUQ,NCH,PRZ,R18,PBR,TBP,MTD,MSF,MTG,MMQ,DHM,2HP,PPF,CHT,HBR,MPJ,MOI,PP2,IPZ,NO3,CCE,715,KAR,MSM,TP5,MLK,CEJ,AA7,BVC,VX6,LIA,DI9,HI6,OBI,CHH,SCK,AT3,ETM,2PN,89I,QIN,MR3,TSZ,NMU,ACH,486,CMO,MES,EMH,FLC,MXD,B2J,BJM,DRL,SX3,SX5, <b>SX6</b> ,9OD,MI1,ICF,79Z,B10,32A,18,20,JZ9,J1Z,PO4,717,AJD,AKD,KCS,XAV,3MC,614,EML,JKZ,ZG1,MPV,3M2,94M,PC,SW1,K9S,513,3MQ,TR7,VMY,7SB,MEU,L2D,L2M,9LI,0OC,ZMA,2N6,0TM,0XT,0RT,10N,POP,SO4,1C6,CE3,KOV,CFX,CLS,CNL,1WG,2C1,TM7,2FQ,EJ4,KK3,39U,RXT,K25,K17,FQI,ACT,3WG,25T,TMO,49J,0A9,RHU,RZH,TAU,50V,56H,5FJ,5JA,5TY,G45,XDI,6C8,6E8,6EB,6FG,6FR,6K5,PFB,7PF,7DF,8MY,A4G,A1Y,YAM |
| 94         | RDC,COC,CLW,BCG,OIN,LOB,P2N,RDA,M1S,7CS,TKT,CWB,MS9,KDH,4ME,96P, <b>MT6</b> ,T21,6F3,6FX,RHQ,7MX,7MW,4I8                                                                                                                                                                                                                                                                                                                                                                                                                                                                                                                                     |
| 95         | PAE,6PR,G88,FOM,GPJ, <b>34F</b> ,P7I,FM6,FM7,FM8,P2H,476,NI9,PAL                                                                                                                                                                                                                                                                                                                                                                                                                                                                                                                                                                             |
| 96         | HSM,DMI, <b>DHI</b> ,1MZ,CL6,EKO,ES3,X89,ECN,9PL,AVI,HIC                                                                                                                                                                                                                                                                                                                                                                                                                                                                                                                                                                                     |
| 97         | 3OL,UNA,MJI,NCW,9HO,AMF,PJ2,U51,EAH,HHG,FEE,S1P,1O2,DPV,U46,LTC,NOO,QUY,QUV,LP5, <b>DB6</b> ,SDS,TMY,RHL,OHN,LTD,RJW                                                                                                                                                                                                                                                                                                                                                                                                                                                                                                                         |
| 98         | EY5,ERB,ZIT,CTY, <b>ERY</b>                                                                                                                                                                                                                                                                                                                                                                                                                                                                                                                                                                                                                  |
| 99         | HW8,HW9,QJ8,Q13,XFK, <b>XFJ</b> ,1EV,HW1,1EW,Q05,QJ7,1Q6,Q14,S5D,4V4,SKO,7S9,S90,EXI                                                                                                                                                                                                                                                                                                                                                                                                                                                                                                                                                         |
| 100        | <b>8ZH</b> ,8ZZ,92Q,90E,90W,90Z,91H,8ZT,90T,91K,8ZK,8ZQ,8ZW                                                                                                                                                                                                                                                                                                                                                                                                                                                                                                                                                                                  |
| 101        | HOP,NM1,78P,GK4,410,SNX,VNI,DF3,AGY, <b>STJ</b> ,KXO,925,N4D,MJG,DE3,746,3P3,085,TJF,9VU,0LN,0RY,20Y,CG4,3E7,3OO,66T,3YX,VFV,3VS,45E,41N,SVR,4KC,4S4,FSU,D7N,SJR,KRX,4QJ,5MK,5MV,5TU,5X0,6P9,6PD,6SR,2LX,8FN,8FK,912,9TW,71T                                                                                                                                                                                                                                                                                                                                                                                                                 |
| 102        | FS8,FJI,HB9,78L, <b>79Q</b>                                                                                                                                                                                                                                                                                                                                                                                                                                                                                                                                                                                                                  |
| 103        | BA1,BZQ,AZN, <b>R69</b> ,R68,R94,R96,PQA,DBE,3M1,TCW,RHN,WL3,537                                                                                                                                                                                                                                                                                                                                                                                                                                                                                                                                                                             |
| 104        | DM2,DM5, <b>DM1</b> ,DM2                                                                                                                                                                                                                                                                                                                                                                                                                                                                                                                                                                                                                     |
| 105        | EB4,ECA,VBN,5LC,PXJ, <b>8LC</b> ,EHS                                                                                                                                                                                                                                                                                                                                                                                                                                                                                                                                                                                                         |
| 106        | <b>VHD</b> ,XJG,L81,XJX,1RC,PV1,PFT                                                                                                                                                                                                                                                                                                                                                                                                                                                                                                                                                                                                          |
| 107        | <b>21Q</b> ,L46,57G,L33,57F,L40,57E,579,56Y,L26,56M,L28,XDM,71X,71Y,99E                                                                                                                                                                                                                                                                                                                                                                                                                                                                                                                                                                      |
| 108        | DXC,DOG,DTX,CHC,DGX, <b>CHD</b> ,TCH,4OA,DOG,6SB                                                                                                                                                                                                                                                                                                                                                                                                                                                                                                                                                                                             |
| 109        | <b>EST</b> ,ESM,ESL,EZT,3WF                                                                                                                                                                                                                                                                                                                                                                                                                                                                                                                                                                                                                  |

| <b>Cluster ID</b> | <b>Cluster members</b>                                                                                                                                                                                                                                                                                |
|-------------------|-------------------------------------------------------------------------------------------------------------------------------------------------------------------------------------------------------------------------------------------------------------------------------------------------------|
| 110               | DHT,VDX,STR,PDN,ANB,CAM,NOG,DEX,MC9,NDR,MOF,TES,HC3,CLR,TH2,VD3,ANO,C3S,KEM,K2B,3T5, <b>PLO</b> ,DLC,VDP,C0R                                                                                                                                                                                          |
| 111               | X6C,3JG,3JK,3JU,3JF,3JS,3JH,3JO, <b>3JJ</b> ,6Z3,9BT,9BW,4YY,9BK,9BH,9B8                                                                                                                                                                                                                              |
| 112               | PYC,FBC,26C,205,NCN,ZZA,FUN,NTM,AVD,4P5,1FL,52P,6PC,BZ2,4BY,HJZ,BFH,NJQ,HTJ,3M3,INO,NNO,P1Y,P4Y,GRI,3MI,4A2,H1I,H0Y,X0B,4WL,ICO,5MI,QNZ,0HO,1F1,0W1,TTY,16V, <b>6P3</b> ,1E4,1E6,1E7,1EJ,1DZ,1XS,1XT,8HC,1XU,22Y,UL4,ZXM,Y0V,5DN,5KR,5WU,61O,60P,65V,MMK,6.00E+07,6ED,6EN,6EO,6EP,QJS,M7O,9FH,9FE,9TZ |
| 113               | PHB,BE2,PAB,DBH,DBH,AIN,MHB,DMB,ANN,3HA,SAL,DHB, <b>BEZ</b> ,AI7,3B4,PHT,GAB,JK E,3HB,0HN,TWO,54G,VJJ                                                                                                                                                                                                 |
| 114               | 394,184, <b>564</b> ,156,254,TTB,9RA,EQN                                                                                                                                                                                                                                                              |
| 115               | FLF,OFL,794,968,NFL,P2C,ZZL,ID8,0C0,0C3,0C8,73B,9S3,54S,AU6,68Q,S16, <b>68W</b> ,A5B,6EC,6J3,C98                                                                                                                                                                                                      |
| 116               | <b>PX3</b> ,O2N,O4N,N44,OM3,OM2,ZT0,OM1,ZT2,ZT4,ZSV,NZL,X0P,S3G,4VW,VXO,FYM, K1T                                                                                                                                                                                                                      |
| 117               | <b>FSB</b> ,FFB,BSB,F2B,F6B,INV,INW,IOA,IOC,IOE,IOF                                                                                                                                                                                                                                                   |
| 118               | EG1,EG2,EG3,SBR,STB,B22,B30,RYJ,RYV,RYX, <b>RYY</b> ,RYZ,RZ0,RZ1,RZ5,RZ7,RZ8                                                                                                                                                                                                                          |
| 119               | FB1,BL1,E36,E38,E02,E27,E59, <b>E49</b> ,E2I,E50,E65,E90,E1E,E1F,E1G,EWW,EWY,EWZ                                                                                                                                                                                                                      |
| 120               | VIA,VDN,5CO,5BO,5IO, <b>5EO</b>                                                                                                                                                                                                                                                                       |
| 121               | 478, <b>017</b> ,DJR,KGQ                                                                                                                                                                                                                                                                              |
| 122               | NGH,HS7, <b>HS1</b> ,HS3,HS4,HS5,HS6,Z79,NHK,JFK,1KY,1KZ                                                                                                                                                                                                                                              |
| 123               | FBS,M25,M28,M29,ZYX,FBV, <b>FB2</b> ,FBW,SKE,M4S,JS7,JDR,J45,J90,J71,J75,J43,9TH,WW3,KR5,3UF,VD9,4J8,4JC,4JE,S2O,5RD,TG4,TG5,949                                                                                                                                                                      |
| 124               | V50,V13,V90,V14,WWX,V1F, <b>WVO</b> ,3TV,5DU,5EF                                                                                                                                                                                                                                                      |
| 125               | AZM,AL5,AL6,AL9,AL1,AL4,AL2,AL3,AL7,TPD,ETS,EZL,EVE,EVF, <b>EVG</b> ,EVH,EVI,EVJ,1YY, BZ1,2EU,XCZ                                                                                                                                                                                                     |
