# Supplementary material for: DEELIG: A Deep Learning Approach to Predict Protein-Ligand Binding Affinity
Source: PubMed Central journal article supplement — Bioinform Biol Insights. 2021 Jul 7;15:11779322211030364. doi: 10.1177/11779322211030364 (PMC8274096; doi:10.1177/11779322211030364), 2021-07-07
Supplement: sj-pdf-3-bbi-10.1177_11779322211030364.pdf [file sj-pdf-3-bbi-10.1177_11779322211030364.pdf]

## SM\_File2: Taxonomic distribution of dataset

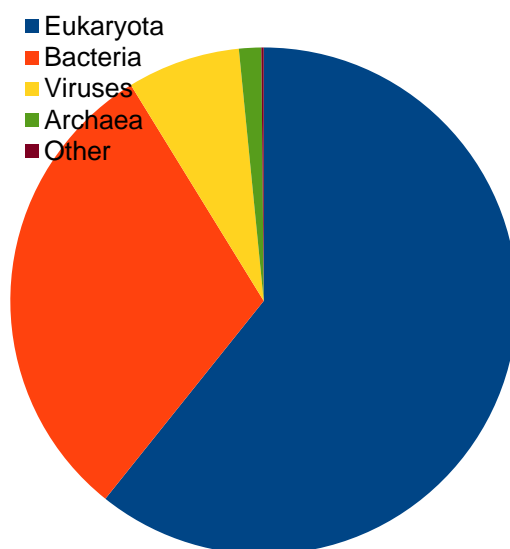

SM\_Figure 2.1: Pie-chart representing taxonomic distribution of protein structures used in DEELIG

### Taxonomy and Species

| Organism                                 | Number |
|------------------------------------------|--------|
| <i>Homo sapiens</i>                      | 1613   |
| <i>Escherichia coli</i>                  | 244    |
| <i>Mycobacterium tuberculosis</i>        | 158    |
| <i>Human immunodeficiency virus spp.</i> | 152    |
| <i>Bos taurus</i>                        | 150    |
| <i>Mus musculus</i>                      | 139    |
| <i>Rattus norvegicus</i>                 | 94     |
| <i>Saccharomyces cerevisiae</i>          | 64     |
| <i>Pseudomonas aeruginosa</i>            | 53     |
| <i>Bacillus subtilis</i>                 | 48     |
| <i>Escherichia virus T4</i>              | 40     |
| <i>Pseudomonas putida</i>                | 34     |
| <i>Streptomyces avidinii</i>             | 32     |
| <i>Thermotoga maritime</i>               | 30     |
| <i>Arabidopsis thaliana</i>              | 25     |
| <i>Staphylococcus aureus</i>             | 25     |
| <i>Oryctolagus cuniculus</i>             | 24     |
| <i>Bacillus megaterium</i>               | 21     |
| <i>Streptococcus pneumoniae</i>          | 19     |
| <i>Lactococcus lactis</i>                | 18     |
| <i>Hepacivirus C</i>                     | 17     |

|                                     |      |
|-------------------------------------|------|
| <i>Human immunodeficiency virus</i> | 16   |
| <i>Vibrio cholerae</i>              | 15   |
| <i>Helicobacter pylori</i>          | 15   |
| <i>Salmonella enterica</i>          | 15   |
| <i>Gallus gallus</i>                | 14   |
| <i>Lactobacillus casei</i>          | 13   |
| <i>Vibrio harveyi</i>               | 13   |
|                                     |      |
|                                     |      |
| <i>Eukaryota</i>                    | 2400 |
| <i>Bacteria</i>                     | 1204 |
| <i>Viruses</i>                      | 285  |
| <i>Archaea</i>                      | 56   |
| <i>Other</i>                        | 6    |

**SM Table 2.1:** Taxonomic and species-specific distribution of protein structures used in training DEELIG

#### Domain Distribution

| Domain Name     | Frequency |
|-----------------|-----------|
| p450            | 255       |
| Pkinase         | 237       |
| Carb_anhydrase  | 237       |
| Pkinase_Tyr     | 201       |
| Bromodomain     | 191       |
| Hormone_recep   | 141       |
| RVP             | 137       |
| Neur_chan_LBD   | 134       |
| Avidin          | 127       |
| Ldh_1_N         | 92        |
| Transthyretin   | 89        |
| Lipocalin       | 88        |
| PNP_UDP_1       | 81        |
| HATPase_c       | 76        |
| Gal-bind_lectin | 68        |
| Trypsin         | 68        |
| VHL             | 68        |
| rve             | 67        |
| HSP70           | 65        |
| DHquinase_II    | 56        |
| NO_synthase     | 55        |
| Lig_chan-Glu_bd | 52        |
| Pantoate_ligase | 51        |
| Phage_lysozyme  | 48        |

|                 |    |
|-----------------|----|
| V-set           | 44 |
| Glyco_hydro_1   | 44 |
| FimH_man-bind   | 44 |
| cNMP_binding    | 41 |
| HPPK            | 39 |
| SBP_bac_8       | 38 |
| Asp             | 38 |
| Aldo_ket_red    | 37 |
| C1-set          | 35 |
| SWIB            | 35 |
| DAO             | 34 |
| GST_C_3         | 34 |
| adh_short_C2    | 34 |
| DHFR_1          | 33 |
| Ras             | 32 |
| P-II            | 32 |
| show            | 31 |
| GST_N           | 31 |
| PARP            | 30 |
| TetR_N          | 29 |
| P53             | 29 |
| FabA            | 29 |
| ketoacyl-synt   | 28 |
| RdRP_3          | 28 |
| SBP_bac_1       | 28 |
| Flavodoxin_1    | 26 |
| Aminotran_1_2   | 26 |
| PA-IL           | 26 |
| Aldedh          | 25 |
| Jacalin         | 25 |
| 2OG-FeII_Oxy_3  | 24 |
| PBP_GOBP        | 24 |
| NNMT_PNMT_TEMT  | 24 |
| Flavodoxin_2    | 24 |
| YgbB            | 23 |
| PH              | 23 |
| DAHPh_synth_1   | 23 |
| tRNA-Thr_ED     | 23 |
| EPSP_synthase   | 23 |
| Thymidylat_synt | 22 |
| Pribosyltran    | 22 |
| Flavin_Reduct   | 21 |
| IF4E            | 21 |
| GLF             | 21 |
| FBPase          | 21 |

|                 |    |
|-----------------|----|
| peroxidase      | 20 |
| Pentaxin        | 20 |
| SnoaL_2         | 20 |
| Lactamase_B     | 19 |
| FKBP_C          | 19 |
| Dioxygenase_C   | 19 |
| An_peroxidase   | 19 |
| NDK             | 19 |
| Hist_deacetyl   | 18 |
| TMEM173         | 18 |
| dUTPase         | 18 |
| ECH_1           | 18 |
| AMPK1_CBM       | 18 |
| Glyco_hydro_18  | 18 |
| Aminotran_3     | 18 |
| Filo_VP35       | 18 |
| Peptidase_M10   | 18 |
| LysR_substrate  | 17 |
| PDEase_I        | 17 |
| Peripla_BP_4    | 17 |
| BCDHK_Adom3     | 17 |
| PALP            | 17 |
| Nitroreductase  | 17 |
| DXP_reductoisom | 16 |
| BPL_C           | 16 |
| DIOX_N          | 16 |
| HMG-CoA_red     | 16 |
| Thiolase_N      | 16 |
| Pyr_redox_2     | 16 |
| NTP_transferase | 16 |
| E1-E2_ATPase    | 16 |
| 4HBT            | 16 |
| F420H2_quin_red | 15 |
| RbsD_FucU       | 15 |
| NAD_binding_1   | 15 |
| Pterin_bind     | 15 |
| Sugar-bind      | 15 |
| Oxidored_FMN    | 15 |
| Phospholip_A2_1 | 15 |
| S_100           | 15 |
| Peripla_BP_2    | 15 |
| Arginase        | 14 |
| DctP            | 14 |
| polyprenyl_synt | 14 |
| Acetyltransf_3  | 14 |

|                 |    |
|-----------------|----|
| SET             | 14 |
| Iso_dh          | 14 |
| ABC_tran        | 14 |
| SBP_bac_3       | 13 |
| FAD_binding_3   | 13 |
| Y_phosphatase   | 13 |
| Peptidase_M4_C  | 13 |
| LRR_8           | 13 |
| Globin          | 12 |
| COesterase      | 12 |
| ArgoMid         | 12 |
| Pan_kinase      | 12 |
| CBS             | 12 |
| NUDIX           | 11 |
| DSBA            | 11 |
| Enterotoxin_b   | 11 |
| GP120           | 11 |
| Thy1            | 11 |
| Putative_PNPOx  | 11 |
| Glyco_hydro_20  | 11 |
| 2-Hacid_dh_C    | 11 |
| DHO_dh          | 11 |
| ADH_zinc_N      | 11 |
| Trp_syntA       | 11 |
| NAGidase        | 11 |
| Amidase_2       | 11 |
| GTP_EFTU        | 11 |
| Phosphorylase   | 11 |
| Macro           | 11 |
| Glyco_transf_6  | 11 |
| Thymidylate_kin | 10 |
| Synapsin_C      | 10 |
| Choline_kinase  | 10 |
| NAPRTase        | 10 |
| HpcH_HpaI       | 10 |
| Exotox-A_cataly | 10 |
| FeoB_N          | 10 |
| Redoxin         | 10 |
| Pep_deformylase | 10 |
| Adenine_glyco   | 10 |
| Antibiotic_NAT  | 10 |
| CTP_transf_like | 10 |
| AlaDh_PNT_C     | 10 |
| TPP_enzyme_N    | 10 |
| Thia_YuaJ       | 10 |

|                 |    |
|-----------------|----|
| Usp             | 10 |
| Mab-21          | 10 |
| PHZA_PHZB       | 10 |
| MoaC            | 9  |
| Rad51           | 9  |
| PGK             | 9  |
| Fungal_lectin   | 9  |
| JmjC            | 9  |
| Ribonuclease    | 9  |
| Peptidase_M1    | 9  |
| Serum_albumin   | 9  |
| Orn_Arg_deC_N   | 8  |
| SQS_PSY         | 8  |
| Cytochrome_B    | 8  |
| Ferritin        | 8  |
| OmpA            | 8  |
| ILEI            | 8  |
| TGT             | 8  |
| GDP_Man_Dehyd   | 8  |
| Semialdhyde_dhC | 8  |
| RnaseA          | 8  |
| Amino_oxidase   | 8  |
| CPSase_L_D2     | 8  |
| adh_short       | 8  |
| 7tm_1           | 8  |
| Bcl-2           | 8  |
| Rep-A_N         | 8  |
| PFK             | 8  |
| F_bP_aldolase   | 8  |
| OTCace_N        | 8  |
| Alpha_L_fucos   | 8  |
| CoA_transf_3    | 8  |
| Adeno_knob      | 8  |
| Citrate_synt    | 8  |
| GMP_PDE_delta   | 8  |
| HTH_Crp_2       | 8  |
| SBP_bac_5       | 8  |
| WD40            | 8  |
| Flu_PB2         | 8  |
| LigT_PEase      | 8  |
| EF-hand_1       | 7  |
| Gag_p24         | 7  |
| Ricin_B_lectin  | 7  |
| PilZ            | 7  |
| ADPrib_exo_Tox  | 7  |

|                  |   |
|------------------|---|
| Laminin_G_1      | 7 |
| Abhydrolase_6    | 7 |
| Bet_v_1          | 7 |
| Peptidase_C14    | 7 |
| Prenyltransf     | 7 |
| PAS_3            | 7 |
| Lectin_legB      | 7 |
| Pro_isomerase    | 7 |
| AMP-binding      | 7 |
| RicinB_lectin_2  | 7 |
| APH              | 7 |
| Polyketide_cyc2  | 7 |
| PrmA             | 7 |
| Sec7             | 7 |
| Peptidase_C1     | 7 |
| MIF              | 7 |
| SBP_bac_6        | 7 |
| F5_F8_type_C     | 7 |
| Glyco_hydro_7    | 7 |
| PdxJ             | 6 |
| Xlink            | 6 |
| Hydrolase        | 6 |
| Cu-oxidase       | 6 |
| DHquinase_I      | 6 |
| Hyd_WA           | 6 |
| MHC_I_3          | 6 |
| Rotamase         | 6 |
| Alpha_kinase     | 6 |
| AA_kinase        | 6 |
| Septin           | 6 |
| SBP_bac_11       | 6 |
| AIRC             | 6 |
| ADH_N            | 6 |
| Glyco_hydro_47   | 6 |
| Rubis-subst-bind | 6 |
| VWA              | 6 |
| Serpin           | 6 |
| DapB_C           | 6 |
| Peripla_BP_1     | 6 |
| cobW             | 6 |
| Abhydrolase_3    | 6 |
| Peptidase_M17    | 6 |
| PfkB             | 6 |
| Chromo           | 6 |
| Arm              | 6 |

|                 |   |
|-----------------|---|
| SusD_RagB       | 6 |
| QRPTase_C       | 5 |
| Lectin_C        | 5 |
| OKR_DC_1        | 5 |
| EAL             | 5 |
| Flavoprotein    | 5 |
| MeaB            | 5 |
| AAA             | 5 |
| PI3Ka           | 5 |
| His_binding     | 5 |
| AAA_26          | 5 |
| ApbA_C          | 5 |
| DMRL_synthase   | 5 |
| Me-amine-dh_L   | 5 |
| BTB             | 5 |
| Tubulin         | 5 |
| CRAL_TRIO       | 5 |
| tRNA-synt_1     | 5 |
| Glyoxalase      | 5 |
| Nitrophorin     | 4 |
| Peptidase_C80   | 4 |
| Tyrosinase      | 4 |
| Neur            | 4 |
| Autoind_bind    | 4 |
| NAD_synthase    | 4 |
| OpuAC           | 4 |
| Flavi_NS5       | 4 |
| HTH_27          | 4 |
| Auxin_BP        | 4 |
| TFR_dimer       | 4 |
| Chorismate_synt | 4 |
| Enoyl_reductase | 4 |
| CIMR            | 4 |
| rhaM            | 4 |
| PAF-AH_p_II     | 4 |
| O-FucT          | 4 |
| Hfq             | 4 |
| Spermine_synth  | 4 |
| RNase_H         | 4 |
| WWE             | 4 |
| UDPG_MGDP_dh_N  | 4 |
| ACPS            | 4 |
| PARP_regulatory | 4 |
| Spin-Ssty       | 4 |
| 03/DD/YY        | 4 |



|                 |   |
|-----------------|---|
| DPPIV_N         | 4 |
| SIR2            | 4 |
| DOT1            | 4 |
| FAD_binding_4   | 4 |
| GBP             | 4 |
| MBT             | 4 |
| TIM             | 4 |
| Glyco_transf_41 | 4 |
| Methyltransf_4  | 4 |
| RdRP_1          | 4 |
| CoA_binding_2   | 4 |
| DNA_pol3_beta_2 | 4 |
| Abhydrolase_2   | 4 |
| DHH             | 4 |
| Kringle         | 4 |
| Piwi            | 4 |
| UbiA            | 4 |
| tRNA-synt_2     | 4 |
| tRNA-synt_1b    | 4 |
| CBM_48          | 4 |
| Amidotransf     | 4 |
| DAHP_synth_2    | 4 |
| AraC_binding    | 4 |
| Pept_tRNA_hydro | 4 |
| L_protein_N     | 4 |
| UPRTase         | 4 |
| RIP             | 4 |
| TrkA_N          | 4 |
| Peripla_BP_3    | 4 |
| Methyltransf_3  | 4 |
| Alk_phosphatase | 4 |
| Methyltransf_25 | 4 |
| FMN_dh          | 4 |
| Glycos_transf_2 | 4 |
| OCD_Mu_crystall | 4 |
| IU_nuc_hydro    | 4 |
| ATP-grasp       | 4 |
| Peptidase_S29   | 4 |
| CdAMP_rec       | 4 |
| RuBisCO_large   | 4 |
| NMT             | 3 |
| Hexokinase_2    | 3 |
| LamB            | 3 |
| MMR_HSR1        | 3 |
| OS-D            | 3 |

|                 |   |
|-----------------|---|
| Ribonuc_L-PSP   | 3 |
| FAD_binding_7   | 3 |
| MarR            | 3 |
| OTCace          | 3 |
| DNA_ligase_aden | 3 |
| PadR            | 3 |
| SHMT            | 3 |
| RIO1            | 3 |
| BPL_LplA_LipB   | 3 |
| LpxC            | 3 |
| Alpha-amyl_C2   | 3 |
| Ribonuc_red_lgC | 3 |
| Bac_luciferase  | 3 |
| APS_kinase      | 3 |
| FtsJ            | 3 |
| Sulfotransfer_1 | 3 |
| Acetyltransf_14 | 3 |
| PanZ            | 3 |
| EIIC-GAT        | 3 |
| Bmp             | 3 |
| Folate_rec      | 3 |
| TetR_C_1        | 3 |
| HAD_2           | 3 |
| IIGP            | 3 |
| Lipocalin_7     | 3 |
| TetR_C_24       | 3 |
| Metalloenzyme   | 3 |
| 2-oxoacid_dh    | 3 |
| AnmK            | 3 |
| Prenyltrans     | 3 |
| BNR_2           | 3 |
| AIG1            | 3 |
| BioY            | 3 |
| Dynamamin_N     | 2 |
| IL2             | 2 |
| HD              | 2 |
| YBD             | 2 |
| Guanylate_cyc   | 2 |
| PI-PLC-X        | 2 |
| S-methyl_trans  | 2 |
| IlvN            | 2 |
| Gp_dh_C         | 2 |
| Kinesin         | 2 |
| HIT             | 2 |
| DHDPS           | 2 |

|                 |   |
|-----------------|---|
| Ubie_methyltran | 2 |
| WH1             | 2 |
| Dak1            | 2 |
| Glucodextran_N  | 2 |
| Glyco_hydro_76  | 2 |
| CYTH            | 2 |
| Glyco_hydro_14  | 2 |
| Reprolysin_5    | 2 |
| Sigma54_activat | 2 |
| ParA            | 2 |
| Me-amine-dh_H   | 2 |
| Methyltransf_33 | 2 |
| NeuB            | 2 |
| NAGLU           | 2 |
| CoA_binding     | 2 |
| Transferrin     | 2 |
| HBM             | 2 |
| HSP90           | 2 |
| CM_2            | 2 |
| ACP_syn_III_C   | 2 |
| Epimerase       | 2 |
| Sial-lect-inser | 2 |
| Amidase         | 2 |
| Myosin_head     | 2 |
| MHC_I           | 2 |
| Glyco_hydro_3   | 2 |
| PAP_assoc       | 2 |
| ROK             | 2 |
| YcgR_2          | 2 |
| NAD_binding_4   | 2 |
| AICARFT_IMPCHas | 2 |
| MoeA_N          | 2 |
| TNF             | 2 |
| Lipocalin_2     | 2 |
| PAS_4           | 2 |
| RasGEF          | 2 |
| SpoU_methylase  | 2 |
| Mur_ligase_M    | 2 |
| ADK             | 2 |
| DcpS            | 2 |
| TctC            | 2 |
| SNF             | 2 |
| Trehalase       | 2 |
| CBM_6           | 2 |
| ATP-synt_ab     | 2 |

|                 |   |
|-----------------|---|
| Ald_Xan_dh_C2   | 2 |
| Arf             | 2 |
| Nucleos_tra2_C  | 2 |
| 3HCDH_N         | 2 |
| NEAT            | 2 |
| Actin           | 2 |
| Peripla_BP_6    | 2 |
| Aldose_epim     | 2 |
| G-alpha         | 2 |
| Lon_C           | 2 |
| Methyltransf_2  | 2 |
| Glycolytic      | 2 |
| ZipA_C          | 2 |
| Pneumo_ncap     | 2 |
| NMT1            | 2 |
| Beta-lactamase2 | 2 |
| Oxysterol_BP    | 2 |
| HipA_C          | 2 |
| SKI             | 2 |
| Asp_Glu_race    | 2 |
| Peptidase_S21   | 2 |
| Fic             | 2 |
| LON_substr_bdg  | 2 |
| 6PF2K           | 2 |
| Leukocidin      | 2 |
| PhzC-PhzF       | 2 |
| GST_C_2         | 2 |
| UTRA            | 2 |
| CVNH            | 2 |
| Glyco_hydro_43  | 2 |
| GGDEF           | 2 |
| ATP-gua_Ptrans  | 2 |
| Diphtheria_C    | 2 |
| PilM_2          | 2 |
| Fusion_gly      | 2 |
| Abhydrolase_1   | 2 |
| HI0933_like     | 2 |
| 6PGD            | 2 |
| Carboxyl_trans  | 2 |
| Glyco_hydro_15  | 2 |
| FGGY_N          | 2 |
| Cupin_5         | 2 |
| VP4_haemagglut  | 2 |
| NmrA            | 2 |
| XylR_N          | 2 |

|                 |   |
|-----------------|---|
| tRNA_m1G_MT     | 2 |
| PGM_PMM_I       | 2 |
| tRNA-synt_1g    | 2 |
| Glucosamine_iso | 2 |
| Fumble          | 2 |
| ATP-synt_DE_N   | 2 |
| HN              | 2 |
| FYVE            | 2 |
| dCache_1        | 2 |
| HMGL-like       | 2 |
| Mannosidase_ig  | 2 |
| TPP_enzyme_M_2  | 2 |
| IGPS            | 2 |
| GMC_oxred_N     | 2 |
| Peptidase_C10   | 2 |
| MDD_C           | 2 |
| PRMT5_TIM       | 1 |
| NAD_kinase      | 1 |
| Phosphonate-bd  | 1 |
| PX              | 1 |
| Aminotran_4     | 1 |
| Sua5_yciO_yrdC  | 1 |
| Ferrochelatae   | 1 |
| PBP_like_2      | 1 |
| Glyco_hydro2_C5 | 1 |
| SGL             | 1 |
| Transketolase_N | 1 |
| FAD_binding_2   | 1 |
| Regulator_TrmB  | 1 |
| PEPCK_GTP       | 1 |
| PH_9            | 1 |
| BioW            | 1 |
| Glyco_hydro_85  | 1 |
| Peptidase_M27   | 1 |
| Pirin_C         | 1 |
| DNA_topoisoIV   | 1 |
| Inhibitor_I9    | 1 |
| RVT_connect     | 1 |
| FAD_binding_6   | 1 |
| Scytalone_dh    | 1 |
| JHD             | 1 |
| Calici_coat_C   | 1 |
| Autoind_synth   | 1 |
| DEAD            | 1 |
| PH_12           | 1 |

|                 |   |
|-----------------|---|
| Pro_dh          | 1 |
| N6_N4_Mtase     | 1 |
| PAE             | 1 |
| Amidohydro_1    | 1 |
| Clp_N           | 1 |
| ABC_ATPase      | 1 |
| Isochorismatase | 1 |
| PI3_PI4_kinase  | 1 |
| 7tm_2           | 1 |
| Peroxidase_2    | 1 |
| DrrA_P4M        | 1 |
| EF-hand_7       | 1 |
| DUF5115         | 1 |
| FBPase_3        | 1 |
| HRM             | 1 |
| ACBP            | 1 |
| TcdA_TcdB       | 1 |
| CAT             | 1 |
| Arabino_trans_C | 1 |
| IMPDH           | 1 |
| FmrO            | 1 |
| Tachylectin     | 1 |
| HisG            | 1 |
| Glyco_trans_1_4 | 1 |
| Peptidase_C3    | 1 |
| Kelch_1         | 1 |
| KIX             | 1 |
| 53-BP1_Tudor    | 1 |
| SusF_SusE       | 1 |
| TP_methylase    | 1 |
| DNA_gyraseB     | 1 |
| OMPdecase       | 1 |
| AKAP7_NLS       | 1 |
| 2OG-FeII_Oxy_2  | 1 |
| Chal_sti_synt_N | 1 |
| GDI             | 1 |
| PARG_cat        | 1 |
| CAP             | 1 |
| NTF2            | 1 |
| UDPGP           | 1 |
| Neocarzinostat  | 1 |
| GHMP_kinases_C  | 1 |
| SRPRB           | 1 |
| ENTH            | 1 |
| Exotox-A_bind   | 1 |

|                 |   |
|-----------------|---|
| Transpeptidase  | 1 |
| DUF1080         | 1 |
| 4HBT_2          | 1 |
| HhH-GPD         | 1 |
| DNA_pol3_delta2 | 1 |
| His_Phos_2      | 1 |
| MFS_1           | 1 |
| PPV_E2_N        | 1 |
| Menin           | 1 |
| DAGK_cat        | 1 |
| MIR             | 1 |
| Ins_P5_2-kin    | 1 |
| His_biosynth    | 1 |
| RabGAP-TBC      | 1 |
| SPRY            | 1 |
| DUF4154         | 1 |
| C2              | 1 |
| Hexapep         | 1 |
| PHD             | 1 |
| Glycos_transf_1 | 1 |
| Carb_kinase     | 1 |
| FTO_NTD         | 1 |
| RsgA_GTPase     | 1 |
| PNTB            | 1 |
| Triabin         | 1 |
| AAA_lid_9       | 1 |
| GTP1_OBG        | 1 |
| DUF3372         | 1 |
| UQ_con          | 1 |
| YCII            | 1 |
| Haspin_kinase   | 1 |
| T3SS_TC         | 1 |
| HsbA            | 1 |
| MaoC_dehydrat_N | 1 |

**SM\_Table 2.2:** Frequency of domain distribution of protein structures used for training DEELIG

**Domain Distribution in dataset**

| Set        | Total | p450 | pkinase | pkinase_tyr |
|------------|-------|------|---------|-------------|
| Training   | 6539  | 251  | 233     | 195         |
| Validation | 498   | 24   | 20      | 13          |
| Test       | 199   | 2    | 6       | 8           |

**SM\_Table 2.3:** Distribution of kinases in our dataset
