# Supplementary material for: DEELIG: A Deep Learning Approach to Predict Protein-Ligand Binding Affinity
Source: PubMed Central journal article supplement — Bioinform Biol Insights. 2021 Jul 7;15:11779322211030364. doi: 10.1177/11779322211030364 (PMC8274096; doi:10.1177/11779322211030364), 2021-07-07
Supplement: sj-pdf-4-bbi-10.1177_11779322211030364.pdf [file sj-pdf-4-bbi-10.1177_11779322211030364.pdf]

## SM\_File3: DEELIG dataset

**SM Table 3.1:** Details of PDB complexes used in the training, testing and validation for DEELIG. Protein-ligand complexes used have been presented in the format ‘\$PDB-ID\_\$Ligand-ID\_\$Chain-ID\_\$Atom-number’ in comma separated text. Here, the ligand ID (Ligand-ID) is as obtained from PDB and ‘Atom-number’ indicates the atom number at which ligand is bound to the protein structure.

| Training set                                                                                                                                                                                                                                                                                                                                                                                                                                                                                                                                                                                                                                                                                                                                                                                                                                                                                                                                                                                                                                                                                                                                                                                                                                                                                                                                                                                                                                                                                                                                                                                                                                                                                                                                                                                                                                                                                                                                                                                                                                                                                                                                                                                                                                                                                                                                                                                                                                                                                                                                                                                                                                                                                                                                                                                                                                                                                                                                                                                                                                                                                                                                                                                                                                                                                                                                                                                                                                                                                                                                                                                                                                                                                                                                                                                                                                                                                                                                                      |
|-------------------------------------------------------------------------------------------------------------------------------------------------------------------------------------------------------------------------------------------------------------------------------------------------------------------------------------------------------------------------------------------------------------------------------------------------------------------------------------------------------------------------------------------------------------------------------------------------------------------------------------------------------------------------------------------------------------------------------------------------------------------------------------------------------------------------------------------------------------------------------------------------------------------------------------------------------------------------------------------------------------------------------------------------------------------------------------------------------------------------------------------------------------------------------------------------------------------------------------------------------------------------------------------------------------------------------------------------------------------------------------------------------------------------------------------------------------------------------------------------------------------------------------------------------------------------------------------------------------------------------------------------------------------------------------------------------------------------------------------------------------------------------------------------------------------------------------------------------------------------------------------------------------------------------------------------------------------------------------------------------------------------------------------------------------------------------------------------------------------------------------------------------------------------------------------------------------------------------------------------------------------------------------------------------------------------------------------------------------------------------------------------------------------------------------------------------------------------------------------------------------------------------------------------------------------------------------------------------------------------------------------------------------------------------------------------------------------------------------------------------------------------------------------------------------------------------------------------------------------------------------------------------------------------------------------------------------------------------------------------------------------------------------------------------------------------------------------------------------------------------------------------------------------------------------------------------------------------------------------------------------------------------------------------------------------------------------------------------------------------------------------------------------------------------------------------------------------------------------------------------------------------------------------------------------------------------------------------------------------------------------------------------------------------------------------------------------------------------------------------------------------------------------------------------------------------------------------------------------------------------------------------------------------------------------------------------------------|
| 182L_BZF_A_401,183L_DEN_A_400,184L_I4B_A_401,185L_IND_A_400,187L_PXY_A_400,1A0T_SUC_P_1,1A0T_SUC_P_2,1A0T_SUC_Q_2,1A0T_SUC_R_2,1A4H_GDM_A_300,1A4K_FRA_B_3083,1A4K_FR_A_H_3083,1A4R_GDP_A_200,1A4R_GNH_B_400,1A50_FIP_A_270,1A7X_FKA_B_201,1A99_PUT_B_371,1A99_PUT_C_371,1A99_PUT_D_371,1A9Q_HPA_A_290,1A9R_HPA_A_290,1A9T_HPA_A_290,1ABF_FCA_A_307,1ABF_FCB_A_308,1ADL_ACD_A_135,1ADO_I3P_A_1104,1AG9_FMN_A_177,1AG9_FMN_B_177,1AGM_ACR_A_495,1AGM_ACR_A_496,1AHX_HCI_A_411,1AHX_HCI_B_411,1AHY_MAE_A_411,1AHY_MAE_B_411,1AJ6_NOV_A_1,1AJ7_NPE_H_217,1AKT_FMN_A_149,1AKU_FMN_A_150,1AKV_FMN_A_152,1AKW_FMN_A_149,1AM1_ADP_A_300,1AMW_ADP_A_300,1APB_FCA_A_307,1APB_FCB_A_308,1ATP_ATP_E_355,1ATR_ADP_A_486,1ATS_ADP_A_486,1AVN_AZI_A_265,1AVN_HSM_A_264,1AX0_A2G_A_401,1AXZ_GAL_A_402,1AXZ_GLA_A_401,1AZL_FMN_A_149,1AZM_AZM_A_262,1B38_ATP_A_381,1B39_ATP_A_381,1B42_M1A_A_600,1B55_4IP_A_171,1BA0_ADP_A_486,1BA1_ADP_A_486,1BAP_ARA_A_307,1BAP_ARB_A_308,1BCD_FMS_A_500,1BCJ_NGA_1_1,1BCJ_NGA_2_1,1BCU_PRL_H_280,1BF3_PHB_A_396,1BGQ_RDC_A_300,1BIR_2GP_A_106,1BIR_2GP_B_107,1BKF_FK5_A_108,1BKJ_FMN_A_241,1BKJ_FMN_B_241,1BKY_1MC_A_600,1BM7_FLF_A_501,1BN1_AL5_A_555,1BN3_AL6_A_555,1BN4_AL9_A_555,1BNN_AL1_A_555,1BNQ_AL4_A_555,1BNT_AL2_A_555,1BNU_AL3_A_555,1BNV_AL7_A_555,1BNW_TPD_A_555,1BP0_UMP_A_317,1BTN_I3P_A_107,1BWN_4IP_A_1,1BWN_4IP_A_172,1BWN_4IP_B_1,1BX6_BA1_A_351,1BZY_IMU_B_300,1BZY_IMU_C_300,1BZY_IMU_D_300,1C0I_BE2_A_1364,1C0I_BE2_A_1365,1C0L_FL_A_1364,1C3V_NDP_A_801,1C3V_NDP_B_1301,1C5C_TK4_L_1001,1C6Y_MK1_B_524,1C6Z_ROC_B_505,1C7E_FMN_A_1149,1C7E_FMN_B_2149,1C7F_FMN_A_1149,1C7F_FMN_B_2149,1C9H_RAP_A_108,1CAM_BCT_A_500,1CBS_REA_A_200,1CC4_PHB_A_396,1CC6_PHB_A_396,1CEA_ACA_A_90,1CEA_ACA_B_90,1CEB_AMH_A_90,1CEB_AMH_B_90,1CJB_IRP_A_300,1CJB_IRP_B_300,1CJB_IRP_C_300,1CJB_IRP_D_300,1CMP_DMI_A_295,1CNW_EG1_A_555,1CNX_EG2_A_555,1CNY_EG3_A_555,1CT8_TAA_D_551,1CTR_TFP_A_153,1CVU_ACD_A_701,1CVU_ACD_B_2701,1CZC_GUA_A_414,1CZE_SIN_A_414,1CZK_FMN_A_170,1CZL_FMN_A_170,1CZO_FMN_A_170,1CZR_FMN_A_170,1D04_FMN_A_170,1D2E_GDP_A_1301,1D2E_GDP_B_1302,1D2E_GDP_C_1303,1D2S_DHT_A_301,1D2V_BR_A_601,1D2V_BR_A_758,1D2V_BR_A_889,1D2V_BR_B_601,1D2V_BR_B_758,1D2V_BR_B_843,1D2V_BR_B_889,1D3D_BZT_B_400,1D3P_BT3_B_400,1D3V_ABH_A_551,1D3V_ABH_B_552,1D4P_BPP_B_400,1D6H_COA_A_390,1D7I_DSS_A_301,1D7I_DSS_B_302,1D7J_BUQ_B_321,1DAR_GDP_A_692,1DB1_VDX_A_428,1DEH_NAD_A_377,1DET_2GP_A_105,1DF8_BTN_A_201,1DF8_BTN_B_202,1DHF_FOL_A_187,1DHF_FOL_B_187,1DHI_MTX_A_161,1DHI_MTX_B_361,1DHJ_MTX_A_161,1DHJ_MTX_B_361,1DJX_I3P_A_1,1DL7_NCH_L_999,1DMB_BCD_A_371,1DRF_FOL_A_187,1DRJ_RIP_A_272,1DRK_RIP_A_272,1DRU_NAD_A_301,1DRV_A3D_A_301,1DRW_NHD_A_301,1DUV_PSQ_G_401,1DUV_PSQ_H_402,1DUV_PSQ_I_403,1DVX_DIF_B_125,1DVZ_OFL_A_125,1DZK_PRZ_A_700,1E3G_R18_A_1000,1E3V_DXC_A_801,1E4H_PBR_A_998,1E5A_TBP_A_999,1E5A_TBP_B_999,1E7V_LY2_A_3095,1E8G_FAD_B_600,1E8W_QUE_A_2095,1E96_GTP_A_200,1EA1_TPF_A_470,1EC1_BEE_A_501,1ECM_TSA_A_500,1ECM_TSA_B_501,1EL7_MTD_A_801,1EL8_MSF_A_801,1EL8_MSF_B_811,1EL9_MTG_A_801,1EL9_MTG_B_811,1ELI_PYC_A_801,1ELI_PYC_B_811,1EOLI_PYC_B_815,1EOU_SMS_A_301,1ERB_ETR_A_184,1EW8_PAE_A_556,1EW8_PAE_B_556,1EW9_MMQ_A_559,1EW9_MMQ_B_559,1EWJ_BLM_C_1004,1EWJ_BLM_D_1003,1EWJ_BLM_E_2001,1EWJ_BLM_F_2002,1EWJ_BLM_H_2003,1EX8_A4P_A_171,1EXA_394_A_450,1F3F_D4T_A_160,1F3F_D4T_B_161,1F3F_D4T_C_164,1F5F_DHT_A_253,1FAO_4IP_A_274,1FBJ_9CR_A_500,1FBJ_9CR_B_1500,1FCX_184_A_450,1FCY_564_A_450,1FCZ_156_A_450,1FD0_254_A_450,1FDQ_HXA_A_133,1FDQ_HXA_B_633,1FGY_4IP_A_1101,1FHW_I5P_B_1002,1FHX_4IP_A_1001,1FHX_4IP_B_1002,1FJ4_TLM_A_500,1FJ4_TLM_B_501,1FJ4_TLM_C_502,1FJ4_TLM_D_503,1FKB_RAP_A_108,1FKF_FK5_A_108,1FKJ_FK5_A_108,1FKL_RAP_A_108,1FL3_SPB_L_225,1FLM_FMN_A_123,1FLM_FMN_B_123,1FLR_FLU_L_600,1FM6_9CR_A_501,1FM6_9CR_U_502,1FM6_BRL_D_503,1FM6_BRL_X_504,1FM9_570_D_200,1FM9_9CR_A_201,1FRB_ZST_A_351,1FTM_AMQ_A_428,1FV0_9AR_A_401,1FZQ_GDP_A_301,1G1D_FSB_A_555, |

1G2K\_NMI\_B\_501,1G45\_FSB\_A\_555,1G46\_F2B\_A\_555,1G48\_F6B\_A\_555,1G4J\_FFB\_A\_555,1G4O\_BSB\_A\_555,1G52\_F2B\_A\_555,1G53\_F6B\_A\_555,1G54\_FFB\_A\_555,1G5Y\_9CR\_B\_501,1G5Y\_9CR\_C\_502,1G6S\_S3P\_A\_601,1G6T\_S3P\_A\_601,1G74\_OLA\_A\_132,1G85\_3OL\_A\_1001,1G85\_3OL\_A\_1002,1G85\_3OL\_B\_1003,1G85\_3OL\_B\_1004,1GAH\_ACR\_A\_497,1GCA\_GAL\_A\_350,1GNI\_OLA\_A\_1001,1GNI\_OLA\_A\_1003,1GNI\_OLA\_A\_1005,1GT1\_3OM\_B\_1159,1GT1\_ANC\_A\_1161,1GT1\_ANC\_B\_1158,1GT1\_PRZ\_A\_1160,1GT3\_3OM\_A\_1161,1GT3\_DHM\_A\_1160,1GT3\_DHM\_B\_1159,1GT4\_UNA\_A\_1160,1GT5\_BZQ\_A\_1160,1GU1\_FA1\_A\_201,1GU1\_FA1\_B\_201,1GU1\_FA1\_C\_201,1GU1\_FA1\_D\_201,1GU1\_FA1\_E\_201,1GU1\_FA1\_F\_201,1GU1\_FA1\_G\_201,1GU1\_FA1\_H\_201,1GU1\_FA1\_I\_201,1GU1\_FA1\_J\_201,1GU1\_FA1\_K\_201,1GU1\_FA1\_L\_201,1GUA\_GNP\_A\_170,1GW6\_BES\_A\_1611,1GWR\_EST\_A\_600,1GWR\_EST\_B\_600,1GWV\_LAT\_A\_1371,1GWV\_UDP\_A\_1369,1GWV\_UDP\_B\_1369,1GWW\_GLC\_B\_1371,1GX4\_UDP\_A\_401,1GX4\_UDP\_B\_401,1GX8\_RTL\_A\_1163,1GZC\_LAT\_A\_1559,1GZF\_NAD\_A\_1248,1GZF\_NAD\_B\_1252,1H0\_A\_I3P\_A\_1164,1H0R\_FA1\_A\_200,1H60\_STR\_A\_500,1H61\_PDN\_A\_1366,1H62\_ANB\_A\_501,1H8S\_AIC\_A\_1000,1HA2\_SWF\_A\_3001,1HDR\_NAD\_A\_244,1HJO\_ADP\_A\_383,1HMR\_ELA\_A\_133,1HMS\_OLA\_A\_133,1HMT\_STE\_A\_133,1HN2\_3OL\_B\_3003,1HN2\_ANC\_A\_3001,1HN2\_ANC\_B\_3002,1HPM\_ADP\_A\_486,1HPV\_478\_B\_200,1HQ5\_S2C\_B\_552,1HS6\_BES\_A\_901,1HSG\_MK1\_B\_902,1HTB\_NAD\_A\_377,1HTB\_NAD\_B\_377,1HXB\_ROC\_A\_100,1HXW\_RIT\_B\_301,1HZZ\_NAD\_A\_400,1I00\_D16\_A\_315,1I00\_D16\_B\_409,1IIE\_DM2\_A\_3001,1I4D\_GDP\_D\_200,1I7Z\_COC\_C\_302,1I80\_9HX\_A\_301,1I80\_9HX\_B\_302,1I80\_9HX\_C\_303,1I9L\_INV\_A\_555,1I9L\_INV\_A\_666,1I9M\_INW\_A\_555,1I9M\_INW\_A\_666,1I9N\_IOA\_A\_555,1I9O\_IOC\_A\_555,1I9O\_IOC\_A\_666,1I9P\_IOE\_A\_555,1I9Q\_IOF\_A\_555,1I9Q\_IOF\_A\_666,1IE9\_VDX\_A\_500,1IEP\_STI\_A\_201,1IEP\_STI\_B\_202,1IF7\_SBR\_A\_555,1IF8\_SBS\_A\_555,1IPC\_MGP\_A\_1000,1IUT\_PAB\_A\_396,1IUU\_PAB\_A\_396,1IUW\_PHB\_A\_396,1IUX\_PHB\_A\_396,1IWI\_CAM\_A\_418,1IWJ\_CAM\_A\_418,1J0X\_NAD\_R\_2336,1JD0\_AZM\_B\_2401,1JGL\_EST\_L\_911,1JIF\_BLM\_B\_401,1JLR\_GTP\_A\_303,1JLR\_GTP\_B\_301,1JLR\_GTP\_C\_300,1JLR\_GTP\_D\_302,1JMF\_UMP\_A\_317,1JMG\_UMP\_A\_317,1JOC\_ITP\_A\_101,1JOC\_ITP\_B\_102,1JPZ\_140\_A\_1470,1JQV\_ORO\_B\_2313,1JQX\_ORO\_A\_1313,1JQX\_ORO\_B\_2313,1JR0\_A24\_E\_104,1JR0\_A24\_H\_104,1JRB\_ORO\_A\_1313,1JRB\_ORO\_B\_2313,1JRC\_ORO\_A\_1313,1JRC\_ORO\_B\_2313,1JT1\_MCO\_A\_700,1K1I\_FD1\_A\_999,1K1J\_FD2\_A\_999,1K1L\_FD3\_A\_999,1K1M\_FD4\_A\_999,1K1N\_CCR\_A\_999,1K6C\_MK1\_B\_902,1K6P\_XN3\_B\_807,1K6V\_XN2\_B\_252,1K74\_9CR\_A\_463,1KDK\_DHT\_A\_301,1KDM\_DHT\_A\_301,1KEL\_AAH\_H\_219,1KFO\_ACP\_A\_418,1KNR\_FAD\_A\_800,1KV1\_BMU\_A\_391,1KXM\_BZI\_A\_2,1KY8\_NAP\_A\_999,1KYV\_RBF\_A\_501,1KYV\_RBF\_B\_502,1KYV\_RBF\_C\_503,1KYV\_RBF\_D\_504,1KYV\_RBF\_E\_505,1KZN\_CBN\_A\_1,1KZO\_FPP\_B\_1002,1L2T\_ATP\_A\_1301,1L2T\_ATP\_B\_1302,1L5Q\_700\_A\_862,1L5Q\_700\_B\_1862,1L5Q\_CFF\_A\_863,1L5Q\_CFF\_A\_864,1L5Q\_CFF\_B\_1863,1L5R\_700\_A\_862,1L5R\_RBF\_A\_859,1L5S\_700\_A\_862,1L5S\_700\_B\_1862,1L5S\_URC\_A\_863,1L5S\_URC\_B\_1863,1L6M\_DBH\_A\_201,1L6M\_DBH\_A\_202,1L6M\_DBH\_B\_301,1L6M\_DBH\_B\_302,1L6M\_DBH\_C\_401,1L7X\_700\_B\_1862,1L7X\_CFF\_A\_863,1L7X\_CFF\_A\_864,1L7X\_CFF\_B\_1863,1L83\_BNZ\_A\_400,1L8B\_MGP\_A\_1000,1L8B\_MGP\_B\_2000,1LBF\_137\_A\_300,1LBK\_GSH\_A\_504,1LBK\_GSH\_B\_503,1LF9\_ACR\_A\_700,1LF9\_ACR\_B\_701,1LFO\_OLA\_A\_128,1LFO\_OLA\_A\_129,1LGT\_BP3\_A\_300,1LGT\_BP3\_A\_301,1LGW\_1AN\_A\_401,1LHU\_EST\_A\_301,1LHW\_ESM\_A\_301,1LI2\_IPH\_A\_400,1LI3\_3CH\_A\_401,1LI6\_5MP\_A\_400,1LIF\_STE\_A\_132,1LIN\_TFP\_A\_153,1LIN\_TFP\_A\_154,1LIN\_TFP\_A\_155,1LIN\_TFP\_A\_156,1LNM\_DTX\_A\_700,1LO7\_4CO\_A\_170,1LRH\_NLA\_C\_7190,1LT8\_CBH\_A\_601,1LT8\_CBH\_B\_602,1LUQ\_BTN\_B\_5200,1LV8\_9PP\_A\_3001,1LV8\_9PP\_D\_3006,1LV8\_9PP\_E\_3004,1LV8\_9PP\_F\_3005,1LVU\_9PP\_A\_6100,1LVU\_9PP\_B\_6200,1LVU\_9PP\_C\_6300,1LVU\_9PP\_D\_6400,1LVU\_9PP\_E\_6500,1LVU\_9PP\_F\_6600,1LWL\_DSO\_A\_900,1M01\_NAG\_A\_507,1M13\_HYF\_A\_435,1M2Z\_DEX\_A\_301,1M2Z\_DEX\_D\_401,1M48\_FRG\_A\_301,1M48\_FRG\_B\_302,1M5W\_DXP\_A\_1001,1M5W\_DXP\_B\_1002,1M5W\_DXP\_E\_1005,1M5W\_DXP\_F\_1006,1M5W\_DXP\_G\_1007,1M6P\_M6P\_A\_200,1M6P\_M6P\_B\_200,1M7Y\_PPG\_A\_600,1M83\_ATP\_A\_400,1M8D\_CLW\_B\_907,1M9J\_CLW\_A\_906,1M9K\_7NI\_A\_906,1MAU\_ATP\_A\_400,1MD2\_233\_D\_2201,1MD2\_233\_D\_2203,1MD2\_233\_E\_1204,1MD2\_233\_E\_1206,1MD2\_233\_F\_1207,1MEP\_BTN\_A\_5100,1MEP\_BTN\_B\_5200,1MEP\_BTN\_C\_5300,1MEP\_BTN\_D\_5400,1MES\_DMP\_B\_323,1MET\_DMP\_A\_323,1MEU\_DMP\_A\_323,1MH5\_HAL\_B\_601,1MH5\_HAL\_H\_602,1MJ7\_HAL\_H\_301,1MJJ\_HAL\_A\_1001,1MK5\_BTN\_A\_5100,1MK5\_BTN\_B\_5200,1MPW\_TMH\_B\_450,1MS6\_BLN\_A\_281,1MSM\_JE2\_B\_1001,1N0S\_FLU\_A\_500,1N3I\_DIH\_A\_401,1N3I\_DIH\_B\_402,1N3I\_DIH\_C\_403,1N43\_BTN\_B\_5200,1N43\_BTN\_C\_5300,1N43\_BTN\_D\_5400,1N49\_RIT\_B\_301,1N49\_RIT\_D\_401,1N4H\_REA\_A\_500,1N4K\_I3P\_A\_1000,1N6B\_DMZ\_A\_501,1N8U\_BDD\_A\_411,1N8U\_BDD\_A\_412,1N8V\_BDD\_A\_502,1N8V\_BDD\_A\_503,1N8V\_BDD\_B\_511,1N8V\_BDD\_B\_513,1N9M\_BTN\_A\_5100,1N9M\_BTN\_B\_5200,1N9M\_BTN\_C\_5300,1N9M\_BTN\_D\_5400,1NDJ\_BTN\_A\_5100,1NDJ\_BTN\_B\_5200,1NDJ\_BTN\_C\_5300,1NDJ\_BTN\_D\_5400,1NF3\_GNP\_A\_200,1NF8\_ISC\_A\_220,1NFS\_DED\_B\_302,1NGA\_ADP\_A\_486,1NGC\_ADP\_A\_486,1NGD\_ADP\_A\_486,1NJA\_DCM\_A\_317,1NJD\_UMP\_A\_317,1NJE\_DCM\_A\_317,1NJF\_ADP\_C\_302,1NJJ\_GET\_A\_601,1NJJ\_GET\_B\_602,1NJJ\_GET\_C\_603,1NJJ\_ORX\_A\_602,1NJJ\_ORX\_C\_604,1NJJ\_ORX\_D\_426,1NKI\_PPF\_B\_5002,1NL5\_MAL\_A\_371,1NLI\_ADE\_A\_248,1NM5\_NAD\_A\_400,1NO6\_794\_A\_322,1NOX\_FMN\_A\_300,1NPL\_MAN\_A\_110,1NPL\_MAN\_A\_112,1NPL\_MAN\_A\_120,1NPL\_MAN\_A\_130,1NQM\_BTN\_A\_150,1NQM\_BTN\_B\_350,1NQM\_BTN\_C\_550,1NQM\_BTN\_D\_750,1NR6\_DIF\_A\_501,1NRJ\_GTP\_B\_1001,1NW4\_I

MH\_A\_301,1NW4\_IMH\_B\_302,1NW4\_IMH\_C\_303,1NW4\_IMH\_D\_304,1NW4\_IMH\_E\_305,1NW4\_IMH\_F\_306,1NW5\_SAM\_A\_401,1NW7\_SAH\_A\_401,1O7O\_LAT\_A\_1369,1O7O\_LAT\_B\_2369,1O7O\_UDP\_A\_1371,1O7Q\_UDP\_A\_1374,1O7Q\_UDP\_B\_1376,1O7Q\_UDP\_B\_1377,1OAR\_AZN\_I\_500,1OAR\_AZN\_J\_500,1OAR\_AZN\_K\_500,1OBA\_CHT\_A\_1341,1OBO\_FMN\_A\_1170,1OBV\_FMN\_A\_1170,1ODI\_ADN\_A\_1237,1ODI\_ADN\_C\_1238,1ODI\_ADN\_D\_1237,1ODI\_ADN\_E\_1237,1ODI\_ADN\_F\_1238,1ODJ\_GMP\_A\_1237,1ODJ\_GMP\_B\_1237,1ODJ\_GMP\_D\_1237,1ODJ\_GMP\_E\_1237,1ODJ\_GMP\_F\_1237,1OE7\_GSH\_B\_301,1OE8\_GSH\_A\_301,1OE8\_GSH\_B\_301,1OFZ\_FUL\_A\_1313,1OFZ\_FUL\_A\_1317,1OFZ\_FUL\_B\_1313,1OFZ\_FUL\_B\_1315,1OFZ\_FUL\_B\_1317,1OFZ\_FUL\_B\_1318,1OGD\_RIP\_A\_1134,1OGD\_RIP\_B\_1132,1OGD\_RIP\_C\_1132,1OGD\_RIP\_D\_1132,1OGD\_RIP\_E\_1132,1OGX\_EQU\_A\_1128,1OGX\_EQU\_B\_1328,1OGZ\_EQU\_A\_1126,1OIF\_IFM\_B\_1446,1OIM\_NOJ\_A\_1447,1OIM\_NOJ\_B\_1447,1OKN\_STB\_A\_555,1OKO\_GAL\_A\_901,1OKO\_GAL\_B\_902,1OKO\_GAL\_D\_902,1OKO\_GLA\_C\_901,1OKO\_GLA\_D\_901,1OLS\_TDP\_A\_601,1OLU\_TDP\_A\_601,1OLX\_TDP\_A\_601,1ONZ\_968\_A\_322,1OPB\_RET\_A\_134,1OPB\_RET\_B\_134,1OPB\_RET\_C\_134,1OPJ\_STI\_A\_3,1OPJ\_STI\_B\_4,1OS5\_NH1\_A\_901,1OSV\_CHC\_A\_202,1OSV\_CHC\_B\_201,1OVD\_ORO\_A\_900,1OVD\_ORO\_B\_901,1OW4\_2AN\_B\_1003,1OWB\_NAD\_B\_3001,1OXR\_AIN\_A\_141,1OZ0\_MS1\_A\_1002,1OZ0\_MS1\_B\_1001,1P19\_IMP\_A\_1300,1P19\_IMP\_B\_2300,1P19\_IMP\_D\_4300,1P1N\_KAI\_A\_999,1P1O\_QUS\_A\_301,1P1Q\_AMQ\_A\_602,1P1Q\_AMQ\_B\_603,1P1Q\_AMQ\_C\_601,1P28\_HBS\_B\_1003,1P9P\_SAH\_A\_300,1PFU\_MPJ\_A\_553,1PG0\_MOD\_A\_553,1PGP\_PG\_A\_502,1PK8\_ATP\_A\_800,1PK8\_ATP\_B\_801,1PK8\_ATP\_C\_802,1PK8\_ATP\_D\_803,1PK8\_ATP\_E\_804,1PK8\_ATP\_F\_805,1PK8\_ATP\_G\_806,1POY\_SPD\_1\_400,1POY\_SPD\_2\_400,1POY\_SPD\_3\_400,1PWM\_FID\_A\_1320,1PX2\_ATP\_A\_800,1PXJ\_CK2\_A\_500,1PZI\_IDM\_F\_106,1PZI\_IDM\_G\_107,1Q0Y\_MOI\_H\_401,1Q1G\_MTI\_A\_301,1Q1G\_MTI\_B\_302,1Q1G\_MTI\_C\_303,1Q1G\_MTI\_D\_304,1Q1G\_MTI\_E\_305,1Q1G\_MTI\_F\_306,1Q72\_COC\_H\_401,1Q7B\_NAP\_A\_1901,1Q7B\_NAP\_B\_2901,1Q7B\_NAP\_C\_3901,1Q7B\_NAP\_D\_4901,1Q8T\_Y27\_A\_930,1Q8U\_H52\_A\_961,1Q8U\_H52\_A\_962,1Q8W\_M77\_A\_960,1Q9D\_OI1\_A\_416,1Q9D\_OI1\_B\_406,1QBS\_DMP\_A\_323,1QFT\_HSM\_A\_176,1QFT\_HSM\_A\_177,1QFT\_HSM\_B\_176,1QFT\_HSM\_B\_177,1QFY\_NAP\_A\_310,1QFY\_NAP\_B\_810,1QG6\_TCL\_A\_601,1QG6\_TCL\_B\_602,1QG6\_TCL\_C\_603,1QG6\_TCL\_D\_604,1QGA\_NAP\_A\_310,1QGA\_NAP\_B\_810,1QIW\_DPD\_A\_154,1QIW\_DPD\_B\_154,1QK3\_5GP\_A\_300,1QK3\_5GP\_B\_300,1QK3\_5GP\_C\_300,1QK3\_5GP\_D\_300,1QK4\_IMP\_A\_300,1QK4\_IMP\_B\_300,1QK4\_IMP\_C\_300,1QK4\_IMP\_D\_300,1QL7\_ZEN\_A\_999,1QLT\_FAD\_A\_600,1QLT\_FAD\_B\_600,1QPB\_PYM\_A\_602,1QPB\_PYM\_B\_602,1QPE\_PP2\_A\_1904,1QQM\_ADP\_A\_486,1QQN\_ADP\_A\_486,1QQO\_ADP\_A\_486,1QXO\_FMN\_A\_4001,1QXO\_FMN\_B\_4002,1QXO\_FMN\_C\_4003,1QXO\_FMN\_C\_4005,1QXO\_FMN\_D\_4004,1QXO\_FMN\_D\_4006,1QY1\_PRZ\_A\_300,1QY2\_IPZ\_A\_300,1R0E\_DFN\_A\_702,1R0E\_DFN\_B\_501,1R0P\_KSA\_A\_0,1R0X\_ATP\_A\_1,1R0X\_ATP\_B\_2,1R0X\_ATP\_C\_3,1R37\_NAD\_A\_403,1R37\_NAD\_B\_403,1R4W\_GSH\_B\_401,1R4W\_GSH\_D\_901,1R6N\_434\_A\_1111,1R9L\_BET\_A\_1001,1RBO\_CAP\_H\_476,1RBO\_CAP\_L\_476,1RD4\_L08\_A\_328,1RD4\_L08\_B\_1328,1RD4\_L08\_C\_2328,1RD4\_L08\_D\_3328,1RG7\_MTX\_A\_161,1RGL\_2GP\_A\_105,1RK3\_VDX\_A\_500,1RMZ\_NGH\_A\_269,1RN8\_DUP\_A\_777,1RPJ\_ALL\_A\_291,1RR6\_IMH\_A\_300,1RU1\_PH2\_A\_181,1RU1\_PH2\_B\_381,1RU2\_APC\_A\_171,1RU2\_HHR\_A\_181,1RX1\_NAP\_A\_164,1RYF\_GDP\_A\_538,1RYF\_GDP\_B\_1538,1RYH\_GNP\_A\_538,1RZ0\_FAD\_A\_1200,1RZ0\_FAD\_B\_2200,1RZ0\_FAD\_C\_3200,1RZ0\_FAD\_D\_4200,1RZ0\_FAD\_E\_5200,1RZ0\_FAD\_F\_6200,1RZ0\_FAD\_H\_8200,1RZ1\_FAD\_C\_3200,1RZ1\_FAD\_D\_4200,1RZ1\_FAD\_E\_5200,1RZ1\_FAD\_F\_6200,1RZ1\_FAD\_G\_7200,1RZ1\_FAD\_H\_8200,1S19\_MC9\_A\_500,1S3X\_ADP\_A\_383,1S8J\_NO3\_A\_801,1SBR\_VIB\_A\_501,1SBR\_VIB\_B\_503,1SBR\_VIB\_B\_504,1SDU\_MK1\_B\_902,1SDV\_MK1\_B\_902,1SG0\_STL\_A\_501,1SG0\_STL\_B\_502,1SGU\_MK1\_B\_2632,1SH9\_RIT\_B\_301,1SQN\_NDR\_A\_1001,1SR7\_MOF\_A\_301,1SR7\_MOF\_B\_302,1SRE\_HAB\_A\_300,1SRE\_HAB\_B\_300,1SRG\_MHB\_A\_300,1SRG\_MHB\_B\_300,1SRI\_DMB\_A\_300,1SRI\_DMB\_B\_300,1SV3\_ANN\_A\_347,1SVS\_GNP\_A\_355,1SW1\_PBE\_A\_301,1SW2\_BET\_A\_301,1SWD\_BTN\_D\_600,1SWE\_BTN\_A\_300,1SWE\_BTN\_D\_600,1SWG\_BTN\_A\_600,1SWG\_BTN\_C\_800,1SWK\_BTN\_A\_5100,1SWK\_BTN\_D\_5400,1SWN\_BTN\_A\_300,1SWN\_BTN\_D\_600,1SWP\_BTN\_A\_300,1SWP\_BTN\_D\_600,1SWP\_BTN\_C\_500,1SWR\_BTN\_B\_400,1SWR\_BTN\_C\_500,1SWR\_BTN\_D\_600,1SWT\_BTN\_A\_500,1SWT\_BTN\_B\_600,1SYN\_F89\_A\_301,1SYN\_F89\_B\_301,1SYO\_M6P\_A\_500,1SYO\_M6P\_B\_1500,1SZ0\_M6P\_B\_1500,1SZD\_APR\_A\_1001,1T3R\_017\_A\_1200,1T5Z\_DHT\_A\_931,1T63\_DHT\_A\_931,1T64\_TSN\_A\_386,1T64\_TSN\_B\_1387,1T79\_DHT\_A\_200,1T7F\_DHT\_A\_200,1T7I\_017\_A\_200,1T7J\_478\_A\_200,1T7R\_DHT\_A\_300,1TCO\_FK5\_C\_509,1TD7\_NFL\_A\_2001,1TL2\_NDG\_A\_237,1TL2\_NDG\_A\_238,1TL2\_NDG\_A\_239,1TL2\_NDG\_A\_240,1TL2\_NDG\_A\_241,1TLC\_DGP\_B\_265,1TLG\_GAL\_A\_126,1TLG\_GAL\_B\_126,1TMM\_APC\_A\_171,1TMM\_APC\_B\_371,1TMM\_HHR\_A\_181,1TMM\_HHR\_B\_381,1TOG\_HCI\_A\_410,1TOG\_HCI\_B\_410,1TOI\_HCI\_A\_410,1TOJ\_HCI\_A\_410,1TOK\_MAE\_A\_410,1TOK\_MAE\_B\_410,1TOX\_NAD\_A\_536,1TPZ\_GDP\_A\_1500,1TPZ\_GDP\_B\_2500,1TR7\_DEG\_A\_501,1TR7\_DEG\_B\_502,1TSD\_UMP\_A\_267,1TSD\_UMP\_B\_265,1TSY\_UMP\_A\_317,1TT1\_KAI\_A\_998,1TT1\_KAI\_B\_999,1TVO\_FRZ\_A\_1001,1TYS\_DHF\_A\_566,1TYS\_TMP\_A\_565,1UIB\_PAX\_A\_901,1UIB\_PAX\_B\_902,1UIW\_3HA\_A\_700,1UIW\_3HA\_B\_701,1U21\_P2C\_A\_211,1U21\_P2C\_B\_221,1U3D\_ANP\_A\_511,1U5B\_TDP\_A\_601,1UAD\_GNP\_A\_200,1UAD\_GNP\_B\_1200,1UCN\_ADP\_A\_1160,1UCN\_ADP\_B\_2160,1UCN\_ADP\_C\_3160,1UDT\_VIA\_A\_1000,1UGW\_GAL\_A\_200,1UGW\_GAL\_C\_1200,1UHO\_VDN\_A\_1000,1UNL\_RRC\_A\_1293,1UOD\_G3H\_A\_1369,1UOD\_G3H\_B\_1369,1UPV\_444

\_A\_462,1UPW\_444\_A\_1462,1UTJ\_ABN\_A\_246,1UTL\_PRA\_M\_246,1UTN\_ABN\_A\_246,1UTN\_ABN\_A\_247,1UTO\_PEA\_A\_1246,1UTP\_PBN\_A\_1246,1UU3\_LY4\_A\_1374,1UV6\_CCE\_D\_1206,1UW1\_ADP\_A\_1074,1UWF\_DEG\_A\_1159,1UZV\_FUC\_B\_999,1V11\_TDP\_A\_601,1V16\_TDP\_A\_601,1V1M\_TDP\_A\_1401,1V48\_HA1\_A\_290,1VC9\_ATP\_A\_1001,1VC9\_ATP\_B\_1002,1VFN\_HPA\_A\_300,1VG0\_GER\_A\_952,1VJC\_A\_TP\_A\_417,1VJD\_ATP\_A\_417,1VKJ\_A3P\_A\_604,1VPO\_TES\_H\_1010,1VYF\_OLA\_A\_1134,1VYG\_ACD\_A\_1134,1VYS\_TNF\_X\_500,1VZC\_UFP\_A\_317,1VZD\_UFP\_A\_317,1W00\_SIA\_A\_1783,1W0P\_SIA\_A\_1784,1W3J\_OXZ\_A\_1447,1W6O\_LAT\_A\_4000,1W6O\_LAT\_B\_4000,1W6Y\_EQU\_A\_201,1W96\_S1A\_B\_1567,1W96\_S1A\_C\_1550,1WCB\_PE1\_L\_1216,1WDQ\_MAL\_A\_498,1WDR\_MAL\_A\_496,1WDR\_MAL\_A\_498,1WE2\_DHK\_A\_181,1WEI\_ADE\_A\_1428,1WPG\_TG1\_A\_1003,1WPG\_TG1\_B\_1103,1WPG\_TG1\_C\_1203,1WS4\_GYP\_A\_501,1WS4\_GYP\_G\_504,1WS5\_MMA\_A\_501,1WS5\_MMA\_C\_502,1WS5\_MMA\_E\_503,1WS5\_MMA\_G\_504,1WVA\_S2C\_A\_1317,1WVA\_S2C\_B\_1316,1X07\_IPE\_A\_901,1X09\_IPE\_A\_902,1X70\_715\_A\_801,1X70\_715\_B\_801,1X7W\_TDP\_A\_801,1X7X\_TDP\_A\_801,1X7Z\_TDP\_A\_801,1X80\_TDP\_A\_801,1X8D\_RNS\_A\_1105,1X8D\_RNS\_B\_1106,1X8D\_RNS\_C\_1107,1X8D\_RNS\_D\_1108,1X8R\_SC1\_A\_601,1X8V\_ESL\_A\_471,1X8V\_ESL\_A\_472,1X9D\_SMD\_A\_1003,1X9Q\_FLU\_A\_1341,1XA5\_KAR\_A\_153,1XGE\_DOR\_A\_1410,1XH4\_R69\_A\_351,1XH5\_R68\_A\_1001,1XJB\_NAP\_A\_1001,1XJB\_NAP\_B\_5001,1XK5\_TPG\_A\_400,1XKK\_FMM\_A\_91,1XPZ\_4TZ\_A\_270,1XQ0\_4TR\_A\_270,1XQ3\_R18\_A\_1001,1XQD\_DND\_A\_502,1XW6\_GSH\_A\_750,1XW6\_GSH\_C\_752,1XW6\_GSH\_D\_753,1XWS\_BI1\_A\_1001,1XZX\_T3\_X\_500,1Y0L\_HAN\_A\_601,1Y0L\_HAN\_D\_701,1Y0L\_HAN\_F\_801,1Y2F\_WAI\_A\_300,1Y2G\_CL3\_A\_301,1Y52\_BTN\_X\_801,1Y52\_BTN\_Y\_802,1Y5B\_TL3\_T\_720,1Y5U\_TL4\_T\_360,1Y6Q\_TDI\_A\_233,1Y6Q\_TDI\_B\_234,1Y7I\_SAL\_A\_501,1Y7I\_SAL\_A\_502,1Y7I\_SAL\_B\_503,1Y8O\_ADP\_A\_504,1Y93\_HAE\_A\_301,1YA3\_STR\_A\_1001,1YA3\_STR\_C\_3001,1YC1\_4BC\_A\_401,1YC4\_43P\_A\_301,1YDB\_AZM\_A\_264,1YDD\_AZM\_A\_264,1YDK\_GTX\_A\_5100,1YDK\_GTX\_B\_5200,1YDT\_IQB\_E\_351,1YEI\_PGG\_L\_551,1YEJ\_PNF\_L\_551,1YET\_GDM\_A\_275,1YID\_ATP\_B\_3000,1YJQ\_NAP\_A\_501,1YKJ\_PHB\_A\_1396,1YKJ\_PHB\_B\_2396,1YKL\_DHB\_D\_1550,1YKL\_DHB\_F\_2550,1YKL\_DHB\_H\_3550,1YKL\_DHB\_J\_4550,1YKL\_DHB\_L\_5550,1YKP\_DHB\_D\_1550,1YKP\_DHB\_H\_3550,1YKP\_DHB\_J\_4550,1YKP\_DHB\_L\_5550,1YP6\_PRZ\_A\_203,1YYZ\_AMP\_A\_435,1YZ0\_AMP\_A\_1844,1YZ0\_AMP\_B\_1841,1Z10\_COU\_B\_501,1Z10\_COU\_D\_501,1Z11\_8MO\_A\_501,1Z11\_8MO\_B\_501,1Z11\_8MO\_C\_501,1Z11\_8MO\_D\_501,1Z3V\_LAT\_A\_500,1ZC9\_PMP\_A\_502,1ZDQ\_MSM\_B\_1508,1ZDS\_A\_CM\_A\_2500,1ZDS\_ACM\_A\_2503,1ZDS\_ACM\_B\_2501,1ZDS\_ACM\_B\_2504,1ZDS\_ACM\_C\_2502,1ZDS\_ACM\_C\_2505,1ZHA\_PEP\_A\_1268,1ZHA\_PEP\_B\_2268,1ZHX\_HC3\_A\_1001,1ZHY\_CLR\_A\_1001,1ZOA\_140\_A\_1470,1ZSB\_AZM\_A\_264,1ZZ1\_SHH\_A\_2452,1ZZ1\_SHH\_C\_2652,1ZZ1\_SHH\_D\_2752,220L\_BNZ\_A\_169,223L\_BNZ\_A\_169,225L\_PXY\_A\_169,2A06\_SMA\_P\_3001,2A2I\_A5P\_A\_1269,2A3C\_PNX\_A\_1434,2A3C\_PNX\_A\_1435,2A3C\_PNX\_B\_2433,2A3C\_PNX\_B\_2434,2A4W\_BLM\_A\_750,2A5B\_8HG\_A\_255,2A5C\_8DA\_A\_303,2A5C\_8DA\_B\_201,2A8G\_GNG\_B\_201,2AA5\_STR\_A\_301,2AA6\_STR\_A\_401,2AA6\_STR\_B\_402,2AAC\_FCB\_B\_179,2ABA\_STR\_A\_1500,2ACO\_VCA\_B\_501,2AEB\_ABH\_A\_551,2AEB\_ABH\_B\_552,2AGT\_FID\_A\_320,2AGV\_BHQ\_A\_1004,2AGV\_BHQ\_B\_1104,2AGV\_TG1\_A\_1003,2AGV\_TG1\_B\_1103,2AMT\_1AA\_A\_1901,2AMT\_1AA\_C\_2901,2AMT\_1AA\_C\_3901,2AMT\_1AA\_E\_4901,2AMT\_1AA\_E\_5901,2ANS\_2AN\_A\_201,2ANS\_2AN\_B\_202,2AO6\_R18\_A\_1001,2AQB\_TL6\_A\_600,2AQB\_TL6\_D\_602,2AQU\_DR7\_B\_300,2ARC\_ARA\_A\_171,2ARM\_OIN\_A\_401,2AS1\_TP5\_A\_500,2AS3\_IPH\_A\_500,2AS4\_3FA\_A\_500,2AS4\_3FA\_A\_700,2ATE\_NIA\_A\_400,2AVO\_MK1\_B\_902,2AVS\_MK1\_B\_902,2AVV\_MK1\_A\_901,2AVV\_MK1\_E\_902,2AY1\_AHC\_B\_414,2AY3\_MPP\_A\_414,2AY4\_PPT\_B\_414,2AY5\_IOP\_B\_414,2AY6\_3IB\_B\_414,2AY8\_4TB\_A\_414,2AY8\_4TB\_B\_414,2AY9\_5PV\_A\_414,2AY9\_5PV\_B\_414,2AZ5\_307\_A\_1,2B3B\_BGC\_C\_2607,2B3B\_BGC\_D\_2608,2B3B\_GLC\_A\_2605,2B3B\_GLC\_B\_2606,2B3B\_GLC\_E\_2609,2B3B\_GLC\_F\_2610,2B3F\_GAL\_C\_3312,2B3F\_GAL\_D\_3313,2B3F\_GAL\_E\_3314,2B3F\_GAL\_F\_3315,2B4L\_BET\_A\_273,2B60\_RIT\_B\_100,2B7Z\_MK1\_B\_200,2B9A\_FBC\_A\_301,2B9A\_FBC\_B\_302,2BAK\_AQZ\_A\_401,2BFR\_ADP\_A\_1193,2BIK\_BI1\_B\_1306,2BJM\_ANF\_H\_500,2BMK\_PDD\_L\_1215,2BMV\_BEN\_A\_1165,2BMZ\_XLM\_A\_1142,2BMZ\_XLM\_B\_1142,2BMZ\_XLM\_B\_1146,2BOJ\_ARW\_A\_1115,2BOJ\_ARW\_C\_1115,2BOJ\_ARW\_D\_1115,2BSA\_NAP\_A\_1305,2BSL\_DHB\_B\_1313,2BT9\_MFU\_A\_1091,2BT9\_MFU\_A\_1092,2BT9\_MFU\_B\_1089,2BT9\_MFU\_B\_1090,2BT9\_MFU\_C\_1090,2BT9\_MFU\_C\_1091,2BUP\_ADP\_A\_486,2BUV\_DHB\_B\_1542,2BYR\_MLK\_A\_301,2BYR\_MLK\_B\_301,2BYR\_MLK\_C\_301,2BYR\_MLK\_D\_301,2BYR\_MLK\_E\_301,2BYR\_MLK\_F\_301,2BYR\_MLK\_H\_301,2BYR\_MLK\_I\_301,2BYS\_LOB\_A\_301,2BYS\_LOB\_B\_301,2BYS\_LOB\_C\_301,2BYS\_LOB\_D\_301,2BYS\_LOB\_G\_301,2BYS\_LOB\_H\_301,2BYS\_LOB\_I\_301,2BZD\_GAL\_A\_1649,2BZD\_GAL\_B\_1649,2BZD\_GAL\_C\_1649,2C1P\_FNZ\_B\_1215,2C1P\_FNZ\_H\_1214,2C1Q\_BTN\_A\_1126,2C3I\_IYZ\_B\_1306,2C5O\_CK2\_A\_1297,2C5O\_CK2\_C\_1298,2C80\_GTX\_A\_1212,2C80\_GTX\_B\_1213,2C8H\_NAD\_A\_1248,2C8H\_NAD\_B\_1250,2C92\_TP6\_A\_701,2C92\_TP6\_B\_701,2C92\_TP6\_C\_701,2C92\_TP6\_D\_701,2C94\_TSF\_B\_701,2C94\_TSF\_C\_701,2C94\_TSF\_D\_701,2C97\_JCL\_B\_701,2C97\_JCL\_C\_701,2C97\_JCL\_D\_701,2C97\_JCL\_E\_701,2CA8\_GSH\_A\_1212,2CB3\_MLD\_A\_1345,2CB3\_MLD\_B\_1344,2CB3\_MLD\_C\_1344,2CBO\_TH2\_A\_120,2CBU\_CTS\_A\_1447,2CBU\_CTS\_B\_1445,2CBV\_CGB\_A\_1447,2CBV\_CGB\_B\_1445,2CBZ\_ATP\_A\_1873,2CES\_GIM\_A\_1447,2CES\_GIM\_B\_1446,2CET\_PGI\_A\_1447,2CEX\_DAN\_B\_1307,2CGF\_P2N\_A\_1214,2CGR\_GAS\_H\_215,2C10\_1CM\_A\_1450,2CIB\_CM6\_A\_14

50,2CIR\_BG6\_A\_501,2CIX\_Cej\_A\_1320,2CJW\_GDP\_A\_999,2CJW\_GDP\_B\_999,2CKM\_AA7\_A\_1536,2C  
LE\_F6F\_A\_1268,2CLF\_F6F\_A\_1269,2CLF\_F6F\_B\_1396,2CLH\_F19\_A\_1268,2CLI\_F9F\_A\_1269,2CLK\_G3  
H\_A\_1268,2CLO\_F19\_A\_1268,2CVD\_HQL\_A\_2201,2CVD\_HQL\_B\_2401,2CVD\_HQL\_D\_2801,2D06\_EST  
\_B\_305,2D09\_FLV\_A\_431,2D09\_FLV\_A\_432,2D0E\_NQ\_A\_409,2D0E\_NQ\_A\_410,2D0K\_FOL\_B\_2161,2D  
M5\_ODI\_A\_312,2DOO\_C4H\_A\_601,2DOO\_C4H\_B\_602,2DQS\_TG1\_A\_1003,2DRC\_MTX\_A\_161,2DRC\_  
MTX\_B\_161,2DRI\_RIP\_A\_272,2DU8\_BEZ\_A\_352,2DU8\_BEZ\_G\_2352,2DU8\_BEZ\_J\_3352,2DU8\_FAD\_B  
\_1351,2DU8\_FAD\_G\_2351,2DU8\_FAD\_J\_3351,2E27\_AB0\_H\_6001,2E2R\_2OH\_A\_1401,2E5Y\_ATP\_B\_10  
02,2E7F\_C2F\_B\_4000,2EF9\_A5P\_A\_1269,2EF9\_A5P\_B\_2269,2EUQ\_BVC\_A\_401,2EWA\_SB2\_A\_361,2E  
WS\_ANP\_A\_1001,2EWS\_ANP\_B\_1002,2EXX\_NAP\_A\_3698,2EZ7\_DHI\_A\_301,2F01\_BTN\_A\_5100,2F01\_  
BTN\_B\_5200,2F01\_BTQ\_A\_5101,2F01\_BTQ\_B\_5201,2F14\_FL1\_A\_1270,2F2U\_M77\_A\_501,2F2U\_M77\_B  
\_1501,2F32\_EGD\_A\_300,2F34\_UBA\_A\_801,2F34\_UBA\_B\_802,2F35\_UBC\_A\_801,2F35\_UBC\_B\_802,2F3  
K\_RO1\_A\_506,2F47\_MGX\_A\_300,2F4J\_VX6\_A\_514,2F5T\_MAL\_X\_343,2F78\_BEZ\_A\_1001,2F78\_BEZ\_  
A\_1003,2F78\_BEZ\_B\_1002,2F78\_BEZ\_B\_1005,2F7A\_BEZ\_A\_1003,2F7A\_CCU\_B\_1001,2F7I\_26C\_A\_326,  
2F7I\_26C\_B\_325,2F80\_017\_B\_301,2F81\_017\_A\_302,2F8F\_GSH\_A\_212,2F8F\_GSH\_B\_301,2F8I\_205\_B\_1  
001,2FF7\_ADP\_A\_708,2FKE\_FK5\_A\_108,2FKF\_G16\_A\_465,2FLH\_ZEA\_A\_701,2FLH\_ZEA\_A\_702,2FLH  
\_ZEA\_A\_708,2FLH\_ZEA\_B\_703,2FLH\_ZEA\_B\_704,2FLH\_ZEA\_C\_709,2FLH\_ZEA\_D\_706,2FOU\_B22\_A  
\_303,2FOV\_B30\_A\_301,2FOY\_B30\_A\_311,2FOY\_B30\_A\_313,2FOY\_B30\_A\_315,2FOY\_B30\_B\_312,2FO  
Y\_B30\_B\_314,2FQW\_NOS\_A\_400,2FQX\_GMP\_A\_400,2FSV\_NAD\_A\_600,2FV5\_541\_A\_1,2FV5\_541\_B\_  
2,2FWP\_CIT\_B\_1002,2FXD\_DR7\_A\_102,2FXS\_RDA\_A\_1001,2FXU\_BID\_A\_402,2FXV\_5GP\_A\_200,2FZ  
W\_NAD\_A\_1377,2FZW\_NAD\_B\_2377,2G5U\_PCQ\_A\_240,2G5U\_PCQ\_B\_239,2G79\_RET\_A\_200,2G86\_U  
MP\_A\_317,2GBP\_BGC\_A\_310,2GCE\_RFC\_A\_2751,2GCE\_RFC\_B\_2752,2GCE\_RFC\_C\_2753,2GCE\_RFC  
\_D\_2754,2GCE\_SFC\_A\_1751,2GCE\_SFC\_B\_1752,2GCE\_SFC\_C\_1753,2GEK\_GDP\_A\_2567,2GFD\_RDA\_  
B\_1002,2GH7\_BTN\_A\_5100,2GH7\_BTN\_B\_5200,2GH7\_BTQ\_A\_5101,2GH7\_BTQ\_B\_5201,2GH9\_MLR\_  
A\_2913,2GJ5\_VD3\_A\_164,2GL0\_ADN\_A\_901,2GL0\_ADN\_B\_902,2GL0\_ADN\_C\_903,2GL0\_ADN\_D\_904  
,2GL0\_ADN\_E\_905,2GL0\_ADN\_F\_906,2GQG\_1N1\_A\_501,2GQG\_1N1\_B\_502,2GQX\_5CL\_A\_1450,2GV  
V\_DI9\_A\_502,2GYU\_HI6\_A\_702,2GYW\_OBI\_A\_952,2GZ1\_NAP\_A\_702,2GZ2\_A2P\_B\_501,2GZ3\_NAP\_  
A\_367,2GZ3\_NAP\_B\_367,2GZ3\_NAP\_C\_367,2GZ3\_NAP\_D\_367,2H12\_OAA\_A\_5007,2H12\_OAA\_B\_500  
8,2H12\_OAA\_C\_5009,2H12\_OAA\_D\_5010,2H12\_OAA\_E\_5011,2H12\_OAA\_F\_5012,2H15\_B19\_A\_300,2H  
21\_SAM\_A\_801,2H21\_SAM\_B\_802,2H21\_SAM\_C\_803,2H23\_SAH\_A\_800,2H23\_SAH\_B\_801,2H23\_SAH  
\_C\_802,2H2J\_SFG\_B\_801,2H2J\_SFG\_C\_802,2H3E\_6PR\_A\_331,2H3E\_6PR\_C\_332,2H4N\_AZM\_A\_264,2H  
5A\_X1P\_X\_600,2H6B\_3C4\_A\_302,2H6B\_3C4\_B\_301,2H77\_T3\_A\_1,2H79\_T3\_A\_1,2H7R\_1MZ\_A\_416,2  
H8Z\_8CM\_A\_801,2H8Z\_8CM\_A\_802,2HA0\_CHH\_A\_1602,2HA0\_CHH\_B\_2602,2HA2\_SCK\_A\_901,2HA2  
\_SCK\_B\_951,2HA3\_CHT\_A\_951,2HA3\_CHT\_B\_961,2HA3\_CHT\_B\_962,2HA5\_AT3\_A\_1901,2HA5\_AT3\_  
A\_1902,2HA5\_AT3\_B\_1951,2HA5\_AT3\_B\_1952,2HA5\_AT3\_B\_1961,2HA5\_ETM\_A\_1905,2HA5\_ETM\_A  
\_1909,2HA5\_ETM\_B\_1955,2HA5\_ETM\_B\_1959,2HA6\_SCK\_A\_902,2HA6\_SCK\_B\_951,2HA6\_SCK\_B\_95  
2,2HAW\_2PN\_A\_2001,2HAW\_2PN\_B\_2002,2HAW\_MG\_A\_1001,2HAW\_MG\_A\_1002,2HAW\_MG\_A\_10  
03,2HAW\_MG\_A\_1004,2HAW\_MG\_B\_1005,2HAW\_MG\_B\_1006,2HAW\_MG\_B\_1007,2HAW\_MG\_B\_10  
08,2HBT\_UN9\_A\_1,2HBU\_UN9\_A\_1,2HF8\_GSP\_A\_300,2HF9\_GSP\_A\_300,2HJ4\_PNZ\_A\_1203,2HJ4\_PN  
Z\_D\_1201,2HJ4\_PNZ\_D\_1202,2HJ4\_PNZ\_H\_1204,2HJB\_PZM\_D\_1102,2HMU\_ATP\_B\_602,2HNV\_ADP\_  
A\_601,2HMV\_ADP\_B\_602,2HQU\_DUP\_A\_777,2HQU\_DUP\_B\_777,2HQU\_DUP\_C\_777,2HRM\_UC5\_A\_7  
77,2HS1\_017\_A\_201,2HS1\_017\_B\_203,2HS2\_017\_A\_201,2HYI\_STI\_A\_600,2HYI\_STI\_B\_600,2HYI\_ST  
I\_C\_600,2HYI\_STI\_D\_600,2HZI\_JIN\_B\_600,2HZL\_PYR\_A\_601,2HZL\_PYR\_B\_602,2HZQ\_STR\_A\_300,2  
I4J\_DRJ\_A\_999,2I4P\_DRH\_A\_999,2I4V\_DJR\_B\_300,2I4X\_KGQ\_B\_300,2I4Z\_DRH\_A\_999,2I6B\_89I\_A\_5  
00,2IDW\_017\_B\_401,2IDZ\_ZID\_A\_300,2IEN\_017\_B\_402,2IEO\_017\_A\_402,2II3\_CAO\_A\_500,2II3\_CAO\_  
G\_500,2IJ7\_TPF\_A\_2472,2IJ7\_TPF\_B\_2470,2IJ7\_TPF\_C\_2471,2IJ7\_TPF\_D\_2473,2IKI\_388\_A\_600,2IKJ\_3  
93\_A\_600,2IKO\_7IG\_A\_601,2IL2\_LIX\_A\_401,2IL2\_LIX\_B\_402,2ILZ\_GTP\_A\_1001,2IMD\_GSH\_A\_301,2I  
MD\_TOH\_A\_304,2IME\_GSH\_A\_301,2IME\_TOH\_A\_304,2IMF\_GSH\_A\_301,2ITM\_XUL\_A\_4930,2ITM\_X  
UL\_B\_4931,2IW4\_2PN\_B\_1318,2IW4\_MN\_A\_1313,2IW4\_MN\_A\_1314,2IW4\_MN\_B\_1317,2IWX\_M1S\_A  
\_1215,2IZF\_BTN\_B\_300,2IZF\_BTN\_D\_301,2IZG\_BTN\_B\_300,2IZG\_BTN\_D\_301,2IZH\_BTN\_D\_300,2IZI  
\_BTN\_A\_300,2IZL\_IMI\_B\_300,2IZL\_IMI\_D\_300,2J2I\_LY4\_B\_1307,2J4K\_U5P\_A\_227,2J4K\_U5P\_B\_227,  
2J4K\_U5P\_C\_227,2J4K\_U5P\_D\_227,2J4K\_U5P\_F\_227,2J75\_NOY\_A\_1446,2J75\_NOY\_B\_1445,2J77\_NOJ\_  
A\_1446,2J77\_NOJ\_B\_1446,2J78\_GOX\_A\_1451,2J78\_GOX\_B\_1446,2J79\_GTL\_A\_1446,2J79\_GTL\_B\_1446  
,2J7B\_NTZ\_B\_1446,2J7E\_GI2\_A\_1446,2J7E\_GI2\_B\_1446,2J7F\_GI3\_A\_1446,2J7F\_GI3\_B\_1446,2J7G\_GI4  
\_A\_1446,2J7H\_AZF\_A\_1446,2J7H\_AZF\_B\_1445,2J9L\_ATP\_A\_1752,2J9L\_ATP\_C\_1755,2J9L\_ATP\_D\_17  
53,2J9L\_ATP\_F\_1750,2J9N\_BEN\_A\_1241,2JBJ\_G88\_A\_1768,2JBV\_FAO\_A\_1528,2JBV\_FAO\_B\_1531,2J  
BZ\_COA\_A\_1126,2JCV\_FOM\_A\_1390,2JCX\_FOM\_A\_1390,2JDM\_MFU\_B\_1117,2JDM\_MFU\_C\_1117,2J  
DM\_MFU\_D\_1117,2JDN\_MMA\_B\_700,2JDN\_MMA\_C\_700,2JDN\_MMA\_D\_700,2JDP\_MFU\_A\_1115,2JD  
P\_MFU\_C\_1115,2JDU\_MFU\_C\_1117,2JDU\_MFU\_D\_1117,2JDY\_MMA\_A\_1115,2JDY\_MMA\_B\_1115,2J  
DY\_MMA\_C\_1115,2JF4\_VDM\_A\_1548,2JFF\_LK2\_A\_1440,2JFZ\_003\_B\_1256,2JFZ\_DGL\_B\_1257,2JG0\_  
TTZ\_A\_1548,2JGS\_BTN\_A\_1001,2JGS\_BTN\_B\_1001,2JGS\_BTN\_C\_1001,2JGS\_BTN\_D\_1001,2JHF\_NAD

\_A\_403,2JHF\_NAD\_B\_403,2JJ3\_JJ3\_B\_1501,2JJC\_LGA\_A\_1225,2JJO\_EY5\_A\_413,2JJP\_KLN\_A\_413,2JL  
B\_UDM\_A\_1569,2JLB\_UDM\_B\_1569,2MAS\_PIR\_A\_400,2MAS\_PIR\_B\_400,2MAS\_PIR\_C\_400,2MAS\_PI  
R\_D\_400,2NMX\_M25\_A\_311,2NMX\_M25\_B\_312,2NMY\_ROC\_A\_401,2NN1\_M28\_B\_312,2NN7\_M29\_A  
\_311,2NN7\_M29\_B\_312,2NND\_PRZ\_A\_300,2NNG\_ZYX\_A\_301,2NNK\_ROC\_A\_401,2NNO\_M28\_A\_301,  
2NNO\_M28\_A\_302,2NNQ\_T4B\_A\_293,2NNS\_CL\_A\_321,2NNS\_M25\_A\_301,2NNS\_M25\_A\_302,2NNV\_  
M29\_A\_302,2NPQ\_BOG\_A\_1000,2NPQ\_BOG\_A\_2000,2NSL\_C2R\_A\_300,2NWS\_A5P\_A\_1269,2NWS\_A  
5P\_B\_2269,2NX1\_RP5\_A\_1269,2NX1\_RP5\_B\_2269,2NX3\_A5P\_A\_269,2NX3\_A5P\_B\_269,2NX3\_A5P\_C\_  
269,2NX3\_A5P\_E\_269,2NX3\_A5P\_F\_269,2NX3\_A5P\_G\_269,2NX3\_A5P\_H\_269,2NX3\_A5P\_J\_269,2NX3\_  
A5P\_K\_269,2NX3\_A5P\_L\_269,2NXE\_SAM\_A\_302,2NXE\_SAM\_B\_303,2NZ5\_226\_A\_431,2NZ5\_226\_A\_4  
32,2NZ5\_226\_B\_431,2NZ5\_226\_B\_432,2O1V\_ADP\_A\_301,2O1V\_ADP\_B\_302,2O3P\_QUE\_A\_501,2O3Z\_  
AI7\_A\_301,2O3Z\_AI7\_B\_301,2O4K\_DR7\_A\_301,2O4L\_TPV\_A\_403,2O4P\_TPV\_A\_300,2O4S\_AB1\_A\_40  
0,2O5Z\_ANO\_H\_501,2O63\_MYC\_A\_501,2O64\_MYU\_A\_501,2O9A\_PYR\_A\_905,2O9A\_PYR\_B\_906,2O9  
A\_PYR\_C\_907,2O9A\_PYR\_D\_908,2OAH\_QIN\_A\_902,2OFF\_NAP\_A\_304,2OFF\_NAP\_B\_802,2OFF\_PAF\_  
A\_602,2OFF\_PAF\_B\_601,2OFU\_1N9\_A\_1,2OGY\_C2F\_A\_3000,2OGY\_C2F\_B\_4000,2O12\_DP6\_A\_300,2O  
IQ\_STI\_A\_1001,2OKG\_G3H\_B\_501,2OO0\_PLP\_A\_600,2OO0\_PLP\_B\_600,2OO0\_XAP\_A\_601,2OOR\_NA  
D\_A\_500,2OOR\_TXP\_C\_400,2OTY\_YAN\_X\_305,2OU0\_MR3\_X\_304,2OV4\_AQP\_A\_400,2OVV\_PFH\_A\_  
999,2OZ2\_DIR\_A\_301,2OZ2\_DIR\_C\_300,2OZL\_TPP\_C\_1330,2P09\_ATP\_A\_500,2P0D\_I3P\_A\_800,2P15\_  
Ezt\_B\_601,2P4S\_DIH\_A\_401,2P4S\_DIH\_B\_403,2P7A\_43M\_A\_1,2P7G\_2OH\_A\_1,2P7Z\_OHT\_A\_201,2P8  
N\_ADE\_A\_271,2P9T\_3PG\_A\_500,2PCP\_1PC\_B\_227,2PCP\_1PC\_C\_212,2PD5\_ZST\_A\_600,2PDF\_ZST\_A\_  
600,2PDH\_47D\_A\_600,2PDJ\_393\_A\_600,2PDK\_SBI\_A\_600,2PDL\_TOL\_A\_600,2PDM\_ZST\_A\_600,2PDN\_  
\_47D\_A\_600,2PDP\_393\_A\_600,2PDQ\_47D\_A\_600,2PDU\_393\_A\_600,2PDW\_FID\_A\_600,2PDX\_ZST\_A\_6  
00,2PDY\_FID\_A\_600,2PEV\_FID\_A\_321,2PEV\_LDT\_A\_320,2PF8\_FID\_A\_321,2PF8\_LDT\_A\_320,2PFH\_FI  
D\_A\_321,2PFH\_LDT\_A\_320,2PFY\_PCA\_A\_302,2PFY\_PCA\_B\_302,2PFY\_PCA\_C\_302,2PGZ\_COC\_D\_40  
1,2PHB\_230\_A\_9001,2PHO\_TSZ\_A\_501,2PJO\_NMU\_A\_303,2PK5\_075\_A\_900,2PK6\_O33\_B\_301,2PLL\_A  
BH\_A\_555,2PLL\_ABH\_B\_556,2PQL\_TSS\_A\_145,2PVW\_G88\_A\_1768,2PY4\_DUP\_A\_777,2PYM\_1UN\_A\_  
\_1001,2PYN\_1UN\_A\_1001,2PZE\_ATP\_B\_2,2PZN\_393\_A\_320,2PZV\_IPH\_A\_401,2PZV\_IPH\_C\_403,2PZV\_  
\_IPH\_D\_404,2Q0I\_BEZ\_A\_990,2Q0J\_BEZ\_A\_500,2Q0J\_BEZ\_B\_500,2Q2N\_H01\_A\_9001,2Q5S\_NZA\_A\_7  
001,2Q5S\_NZA\_B\_5001,2Q63\_1UN\_A\_1001,2Q64\_1UN\_B\_1001,2Q6M\_P34\_A\_1001,2Q6M\_P34\_A\_1002,  
2Q7Q\_C2B\_D\_2002,2Q7Q\_C2B\_H\_2001,2Q88\_4CS\_A\_501,2Q8H\_TF4\_A\_438,2Q9F\_C3S\_A\_600,2QBU\_  
SAH\_B\_501,2QBU\_SAH\_B\_502,2QEH\_SRO\_A\_145,2QFO\_A13\_A\_900,2QFO\_A51\_A\_999,2QFQ\_S3P\_A\_  
\_701,2QFS\_S3P\_A\_701,2QFT\_GPJ\_A\_801,2QFT\_S3P\_A\_701,2QFU\_GPJ\_A\_801,2QFU\_S3P\_A\_701,2QHD  
\_DAO\_B\_502,2QHM\_7CS\_A\_500,2QM7\_GDP\_A\_601,2QM9\_TDZ\_A\_201,2QNQ\_QN3\_A\_2501,2QPQ\_CI  
T\_A\_302,2QPQ\_CIT\_C\_302,2QPU\_QPU\_A\_3000,2QPU\_QPU\_C\_3000,2QRY\_TPS\_A\_400,2QRY\_TPS\_B\_  
400,2QRY\_TPS\_C\_400,2QS1\_UB1\_A\_603,2QS2\_UBF\_A\_603,2QS2\_UBF\_B\_602,2QS3\_UBE\_A\_603,2QS3\_  
\_UBE\_B\_602,2QS4\_LY5\_C\_259,2QTA\_TDP\_A\_887,2QTA\_TDP\_B\_887,2QTN\_NCN\_B\_191,2QTR\_NXX\_  
A\_191,2QTR\_NXX\_B\_192,2QTR\_NXX\_C\_191,2QVD\_BER\_A\_1811,2QVU\_FDP\_A\_338,2QWL\_ADP\_B\_  
486,2QWM\_ADP\_A\_486,2QWM\_ADP\_B\_486,2QWO\_ADP\_A\_487,2QWP\_ADP\_A\_487,2QWQ\_ADP\_A\_4  
87,2QWX\_ML1\_A\_233,2QWX\_ML1\_B\_233,2QX4\_ML1\_A\_233,2QX6\_ML1\_A\_233,2QX8\_ML2\_A\_235,2  
QX8\_ML2\_B\_233,2QX9\_ML2\_A\_233,2QX9\_ML2\_A\_234,2R09\_4IP\_A\_405,2R09\_4IP\_B\_400,2R0D\_4IP\_  
A\_402,2R0D\_4IP\_B\_400,2R0H\_CTO\_A\_165,2R0H\_CTO\_C\_165,2R0H\_CTO\_D\_165,2R14\_TXD\_A\_600,2R  
3D\_ACM\_A\_303,2R58\_MLY\_A\_436,2R5A\_MLZ\_A\_436,2R5N\_R5P\_A\_670,2R5P\_MK1\_B\_902,2R5P\_MK  
1\_D\_902,2R75\_01G\_I\_614,2RA6\_ETY\_A\_604,2RA6\_ETY\_B\_601,2RA6\_ETY\_C\_603,2RCB\_DSN\_A\_901,  
2RCN\_GDP\_A\_600,2RD6\_78P\_A\_900,2RDE\_C2E\_A\_301,2REG\_CHT\_A\_1,2REG\_CHT\_B\_1,2RFY\_CBI\_  
A\_431,2RFY\_CBI\_B\_431,2RIN\_ACH\_A\_1,2RIO\_ADP\_A\_1101,2RIO\_ADP\_B\_2101,2RKU\_R78\_A\_500,2R  
TD\_BTN\_B\_300,2RTE\_BTN\_B\_300,2RTF\_BTN\_B\_300,2RTF\_BTN\_D\_301,2RTG\_BTN\_B\_300,2RTG\_BT  
N\_D\_301,2STD\_CRP\_A\_175,2UVI\_UNG\_A\_1431,2UWD\_2GG\_A\_1228,2UXI\_G50\_A\_1211,2UXI\_G50\_B\_  
\_1211,2UXI\_G50\_B\_1212,2UXU\_NAR\_A\_1211,2UXU\_NAR\_B\_1211,2UYN\_2KT\_A\_1129,2UYN\_2KT\_B\_  
\_1129,2UYN\_2KT\_C\_1129,2UYW\_BTN\_A\_1123,2UYW\_BTN\_D\_1124,2UZJ\_E64\_B\_1254,2UZT\_SS3\_A\_  
1351,2V00\_V15\_A\_1336,2V3U\_DSN\_A\_1262,2V57\_PRL\_A\_1188,2V58\_LZJ\_A\_1448,2V58\_LZJ\_B\_1447,  
2V59\_LZK\_A\_1446,2V59\_LZK\_B\_1446,2V5V\_FMN\_A\_170,2V5X\_V5X\_A\_1380,2V5X\_V5X\_B\_1380,2V  
7A\_627\_A\_1504,2V7A\_627\_B\_1504,2V8Q\_AMP\_E\_1327,2V8Q\_AMP\_E\_1328,2V8Q\_AMP\_E\_1329,2V8  
W\_MGO\_A\_1218,2V8X\_MGQ\_A\_1218,2V8X\_MGQ\_E\_1218,2V8Y\_MGV\_A\_1218,2V8Y\_MGV\_E\_1218,2  
V92\_AMP\_E\_1329,2V92\_ATP\_E\_1327,2V92\_ATP\_E\_1328,2VB8\_TLM\_A\_1405,2VB8\_TLM\_B\_1405,2VB  
8\_TLM\_C\_1405,2VB8\_TLM\_D\_1405,2VBA\_P4T\_A\_1405,2VC9\_NOK\_A\_1909,2VCB\_OAN\_A\_1911,2VC  
I\_2GJ\_A\_1225,2VCW\_ZZA\_B\_1201,2VCX\_D26\_B\_1201,2VCX\_D26\_C\_1202,2VCX\_D26\_D\_1201,2VE3\_  
REA\_A\_1445,2VE3\_REA\_B\_1445,2VFK\_AMP\_A\_1293,2VHJ\_ADP\_A\_1301,2VHJ\_ADP\_B\_1301,2VHJ\_A  
DP\_C\_1301,2VHQ\_ATP\_A\_1327,2VHQ\_ATP\_B\_1327,2VHQ\_ATP\_C\_1327,2VHW\_NAI\_A\_1373,2VHW\_  
NAI\_B\_1372,2VHW\_NAI\_C\_1372,2VHW\_NAI\_D\_1371,2VHW\_NAI\_E\_1374,2VHW\_NAI\_F\_1374,2VK2\_  
GZL\_A\_1298,2VKU\_DBE\_A\_1446,2VKU\_DBE\_A\_1447,2VKU\_DBE\_A\_1449,2VMC\_A2G\_A\_501,2VMC\_  
\_NGA\_A\_505,2VMD\_MBG\_A\_501,2VMF\_MVL\_A\_1865,2VMF\_MVL\_B\_1868,2VNH\_NAP\_A\_274,2VNI

\_A2P\_A\_274,2VNJ\_NAP\_A\_274,2VNV\_MMA\_A\_201,2VNV\_MMA\_B\_201,2VNV\_MMA\_C\_201,2VNV\_MMA\_D\_201,2VNV\_MMA\_E\_201,2VO4\_4NM\_A\_1221,2VPN\_4CS\_A\_1311,2VPN\_4CS\_B\_1311,2VPO\_6CS\_A\_1312,2VQZ\_MGT\_A\_1483,2VQZ\_MGT\_B\_1483,2VQZ\_MGT\_D\_1483,2VQZ\_MGT\_E\_1483,2VQZ\_MGT\_F\_1483,2VRJ\_NCW\_A\_1446,2VSR\_9HO\_A\_1477,2VSR\_9HO\_A\_1478,2VSR\_9HO\_B\_1476,2VT3\_ATP\_A\_302,2VT3\_ATP\_B\_302,2VTD\_LKM\_A\_1441,2VTZ\_COA\_A\_1393,2VTZ\_COA\_B\_1393,2VTZ\_COA\_C\_1393,2VTZ\_COA\_D\_1393,2VU3\_LZE\_A\_1299,2VUK\_P83\_B\_1291,2VVN\_NHT\_A\_1718,2VVN\_NHT\_B\_1716,2VW5\_BC6\_A\_500,2VW5\_BC6\_C\_500,2VW5\_BC6\_D\_500,2VXN\_PGH\_A\_1251,2VZM\_NRB\_A\_1408,2VZM\_NRB\_B\_1408,2VZR\_GCU\_A\_1129,2VZR\_GCU\_B\_1129,2W08\_TPO\_A\_500,2W08\_TPO\_B\_500,2W08\_TPO\_C\_500,2W08\_TPO\_D\_500,2W08\_TPO\_E\_500,2W0B\_CMW\_A\_1450,2W4X\_STZ\_A\_1591,2W87\_GCU\_A\_1150,2W8J\_PLS\_A\_1420,2W8W\_PLS\_A\_1420,2W8Y\_486\_A\_1000,2W8Y\_NDR\_B\_1000,2W95\_NGA\_A\_254,2W95\_NGA\_C\_254,2W97\_GOL\_A\_1222,2W97\_GOL\_B\_1220,2W9G\_NDP\_A\_1160,2W9H\_TOP\_A\_1160,2W9S\_NDP\_B\_1159,2W9S\_NDP\_C\_1159,2W9S\_TOP\_B\_1160,2W9S\_TOP\_D\_1158,2W9S\_TOP\_E\_1160,2W9S\_TOP\_F\_1159,2WBD\_RO5\_B\_1337,2WBD\_RO5\_C\_1337,2WBD\_RO5\_D\_1337,2WBD\_RO5\_E\_1337,2WBD\_RO5\_F\_1337,2WBD\_RO5\_G\_1337,2WBD\_RO5\_H\_1337,2WC4\_AMF\_A\_1446,2WC4\_AMF\_C\_1446,2WCV\_FUC\_B\_1141,2WCV\_FUC\_D\_1141,2WCV\_FUC\_E\_1141,2WCV\_FUC\_F\_1141,2WCV\_FUC\_G\_1141,2WCV\_FUC\_I\_1141,2WCV\_FUC\_J\_1141,2WD8\_VGF\_A\_1270,2WD8\_VGF\_B\_1269,2WD8\_VGF\_C\_1270,2WD8\_VGF\_D\_1269,2WDO\_ACO\_A\_1125,2WDY\_COA\_A\_1128,2WE0\_UMP\_A\_1257,2WE3\_DUT\_A\_1257,2WEG\_FBV\_A\_1263,2WEH\_FB1\_A\_1263,2WEJ\_FB2\_A\_1263,2WEQ\_GDM\_A\_1215,2WER\_RDC\_A\_1215,2WER\_RDC\_B\_1215,2WF5\_BG6\_A\_1831,2WGE\_TLM\_A\_1424,2WGG\_TLM\_A\_1417,2WGG\_TLM\_C\_1417,2WGG\_TLM\_E\_1417,2WGG\_TLM\_F\_1417,2WGG\_TLM\_G\_1419,2WGG\_TLM\_H\_1417,2WH8\_II2\_A\_460,2WH8\_II2\_D\_460,2WHF\_II4\_A\_1405,2WHF\_II4\_B\_1406,2WHW\_1D4\_A\_1410,2WHW\_1D4\_B\_1410,2WI9\_1D2\_A\_1409,2WIC\_GNP\_A\_1265,2WJG\_GDP\_A\_200,2WJG\_GDP\_B\_200,2WJI\_GNP\_A\_1166,2WJI\_GNP\_B\_1166,2WKT\_COA\_A\_1397,2WKT\_COA\_B\_1398,2WKT\_COA\_C\_1394,2WKT\_COA\_D\_1395,2WKV\_COA\_A\_1397,2WKV\_COA\_B\_1399,2WKV\_COA\_C\_1393,2WLV\_COA\_D\_1395,2WL4\_COA\_A\_1402,2WL4\_COA\_B\_1401,2WL5\_COA\_A\_1399,2WL5\_COA\_B\_1399,2WN9\_ZY5\_B\_301,2WN9\_ZY5\_C\_301,2WN9\_ZY5\_D\_301,2WN9\_ZY5\_E\_301,2WNC\_TKT\_A\_300,2WNC\_TKT\_C\_300,2WNC\_TKT\_D\_300,2WNC\_TKT\_E\_300,2WNJ\_ZY7\_A\_301,2WNJ\_ZY7\_B\_301,2WNJ\_ZY7\_C\_301,2WNJ\_ZY7\_D\_301,2WOR\_2AN\_A\_1098,2WOS\_6AN\_A\_1098,2WQ4\_SFU\_B\_200,2WQ4\_SFU\_C\_200,2WQ5\_MIY\_A\_1120,2WSA\_646\_A\_1423,2WSV\_LBT\_A\_1685,2WTV\_ZZL\_A\_1390,2WTV\_ZZL\_B\_1390,2WUF\_KEM\_B\_1289,2WUZ\_TPF\_A\_1460,2WVA\_TPU\_A\_600,2WVA\_TPU\_B\_600,2WVA\_TPU\_E\_600,2WVA\_TPU\_F\_600,2WVA\_TPU\_V\_600,2WVA\_TPU\_Y\_600,2WVA\_TPU\_Z\_600,2WX2\_TPF\_A\_1460,2WX2\_TPF\_B\_1460,2WXP\_GD9\_A\_1500,2WYF\_MBG\_A\_202,2WYF\_MBG\_C\_202,2WYF\_MBG\_D\_202,2WYF\_MBG\_F\_202,2WYF\_MBG\_G\_202,2WYF\_MBG\_H\_202,2WZG\_UPG\_A\_1525,2X00\_GYN\_A\_301,2X00\_GYN\_B\_301,2X00\_GYN\_E\_301,2XAB\_VHD\_A\_1224,2XAB\_VHD\_B\_1224,2XB7\_GUI\_A\_1501,2XBK\_XBK\_A\_1399,2XBP\_ATP\_A\_1114,2XBV\_XBV\_A\_1245,2XC3\_RT8\_A\_1434,2XCG\_XCG\_B\_602,2XDE\_1B0\_A\_1148,2XDE\_1B0\_B\_1147,2XDK\_XDK\_A\_1226,2XDL\_2DL\_A\_1225,2XDU\_LGA\_A\_1227,2XD\_X\_WOE\_A\_1224,2XE6\_3PG\_A\_1417,2XFH\_CL6\_A\_1413,2XFH\_CL6\_B\_1414,2XGS\_44P\_A\_1569,2XGS\_44P\_B\_1569,2XHR\_COP\_A\_1001,2XHT\_C0Y\_A\_1224,2XI7\_XI7\_A\_1186,2XI7\_XI7\_B\_1186,2XIB\_DFU\_A\_1472,2XIB\_DFU\_C\_1472,2XIB\_DFU\_D\_1472,2XJ2\_985\_A\_1001,2XJ7\_GC2\_A\_1000,2XJ7\_GC2\_B\_1000,2XJG\_XJG\_A\_1224,2XJJ\_L81\_B\_1225,2XJX\_XJX\_A\_1232,2XK2\_ADP\_A\_1226,2XMI\_LTM\_A\_1717,2XMI\_LTM\_B\_1716,2XN3\_ID8\_A\_1356,2XN5\_FUN\_A\_1356,2XNJ\_FAD\_A\_1257,2XNJ\_FAD\_B\_1257,2XNJ\_NAP\_A\_1258,2XNJ\_NAP\_B\_1258,2XP2\_VGH\_A\_9000,2XP8\_4FY\_A\_1165,2XTM\_GDP\_A\_1228,2XTM\_GDP\_B\_1227,2XTN\_GTP\_A\_1231,2XUZ\_EB4\_A\_1300,2XV1\_ECA\_A\_1301,2XXT\_KAI\_A\_900,2XXT\_KAI\_B\_900,2XXV\_KAI\_A\_900,2XXV\_KAI\_B\_900,2XYA\_7L4\_A\_1181,2XZW\_AKG\_A\_201,2XZW\_AKG\_B\_201,2XZW\_AKG\_F\_201,2XZW\_AKG\_H\_201,2XZW\_AKG\_I\_201,2Y1D\_34F\_A\_1390,2Y1W\_849\_A\_1005,2Y1W\_849\_B\_1005,2Y1W\_849\_C\_1005,2Y1W\_849\_D\_1005,2Y33\_UN9\_A\_901,2Y34\_UN9\_A\_601,2Y3F\_BTN\_A\_1136,2Y4K\_GDP\_A\_401,2Y4K\_GDP\_B\_401,2Y4S\_BCD\_A\_1895,2Y5A\_3AP\_A\_1295,2Y6O\_1N1\_A\_1892,2Y7J\_B49\_A\_1294,2Y7J\_B49\_B\_1294,2Y7J\_B49\_C\_1294,2Y7J\_B49\_D\_1294,2Y7K\_SAL\_A\_1302,2Y7K\_SAL\_B\_1303,2Y7K\_SAL\_C\_1304,2Y7K\_SAL\_D\_1305,2Y7K\_SAL\_E\_1302,2Y7K\_SAL\_F\_1300,2Y7P\_SAL\_A\_1000,2Y8L\_ADP\_E\_1327,2Y8L\_ADP\_F\_1328,2Y9G\_LAT\_A\_1151,2Y9G\_LAT\_B\_1153,2YAY\_DUP\_A\_1265,2YAZ\_UMP\_A\_1265,2YAZ\_UMP\_D\_1265,2YAZ\_UMP\_E\_1266,2YB0\_DUR\_A\_1266,2YB0\_DUR\_B\_1266,2YB0\_DUR\_C\_1266,2YB0\_DUR\_D\_1266,2YB0\_DUR\_E\_1266,2YCH\_ATP\_A\_502,2YDW\_WSH\_B\_1182,2YDW\_WSH\_C\_1183,2YEK\_EAM\_A\_1188,2YEK\_EAM\_B\_1183,2YEL\_WSH\_A\_1170,2YEM\_WSH\_A\_1459,2YEM\_WSH\_B\_1460,2YFA\_LMR\_B\_501,2YFE\_YFE\_A\_999,2YFX\_VGH\_A\_9000,2YGA\_GDM\_A\_1215,2YGE\_GDM\_A\_1215,2YGF\_GDM\_A\_1215,2YHW\_BM3\_A\_1718,2YHY\_BM3\_A\_1000,2YI5\_YI5\_A\_1226,2YI6\_6QM\_A\_1225,2YI7\_BZ8\_A\_1225,2YIM\_MC4\_A\_1363,2YIM\_MC4\_B\_1363,2YIM\_MC4\_C\_1363,2YIS\_YIS\_A\_1353,2YIW\_YIW\_A\_1353,2YIX\_YIX\_A\_1355,2YK1\_NCT\_H\_300,2YLD\_CMO\_A\_129,2YLG\_CMO\_A\_129,2YMD\_SRO\_A\_1213,2YMD\_SRO\_B\_1212,2YMD\_SRO\_C\_1213,2YMD\_SRO\_D\_1214,2YMD\_SRO\_E\_1214,2YMD\_SRO\_F\_1214,2YMD\_SRO\_G\_1213,2YMD\_SRO\_H\_1213,2YME\_CWB\_A\_1207,2YME\_CWB\_B\_1207,2YME\_CWB\_C\_1207,2YME\_CWB\_D\_1207,2YME\_CWB\_E\_1207,2YME\_CWB\_F\_1207,2YME\_CWB\_G\_1207,2YME\_CWB\_H\_1207,2YME\_CWB\_I\_1207,2YME\_CWB\_J\_1207,2YME\_CWB\_K\_1207,2YME\_CWB\_L\_1207,2YME\_CWB\_M\_1207,2YME\_CWB\_N\_1207,2YME\_CWB\_O\_1207,2YME\_CWB\_P\_1207,2YME\_CWB\_Q\_1207,2YME\_CWB\_R\_1207,2YME\_CWB\_S\_1207,2YME\_CWB\_T\_1207,2YME\_CWB\_U\_1207,2YME\_CWB\_V\_1207,2YME\_CWB\_W\_1207,2YME\_CWB\_X\_1207,2YME\_CWB\_Y\_1207,2YME\_CWB\_Z\_1207,2YME\_CWB\_AA\_1207,2YME\_CWB\_AB\_1207,2YME\_CWB\_AC\_1207,2YME\_CWB\_AD\_1207,2YME\_CWB\_AE\_1207,2YME\_CWB\_AF\_1207,2YME\_CWB\_AG\_1207,2YME\_CWB\_AH\_1207,2YME\_CWB\_AI\_1207,2YME\_CWB\_AJ\_1207,2YME\_CWB\_AK\_1207,2YME\_CWB\_AL\_1207,2YME\_CWB\_AM\_1207,2YME\_CWB\_AN\_1207,2YME\_CWB\_AO\_1207,2YME\_CWB\_AP\_1207,2YME\_CWB\_AQ\_1207,2YME\_CWB\_AR\_1207,2YME\_CWB\_AS\_1207,2YME\_CWB\_AT\_1207,2YME\_CWB\_AU\_1207,2YME\_CWB\_AV\_1207,2YME\_CWB\_AW\_1207,2YME\_CWB\_AX\_1207,2YME\_CWB\_AY\_1207,2YME\_CWB\_AZ\_1207,2YME\_CWB\_BA\_1207,2YME\_CWB\_BB\_1207,2YME\_CWB\_BC\_1207,2YME\_CWB\_BD\_1207,2YME\_CWB\_BE\_1207,2YME\_CWB\_BF\_1207,2YME\_CWB\_BG\_1207,2YME\_CWB\_BH\_1207,2YME\_CWB\_BI\_1207,2YME\_CWB\_BJ\_1207,2YME\_CWB\_BK\_1207,2YME\_CWB\_BL\_1207,2YME\_CWB\_BM\_1207,2YME\_CWB\_BN\_1207,2YME\_CWB\_BO\_1207,2YME\_CWB\_BP\_1207,2YME\_CWB\_BQ\_1207,2YME\_CWB\_BR\_1207,2YME\_CWB\_BS\_1207,2YME\_CWB\_BT\_1207,2YME\_CWB\_BU\_1207,2YME\_CWB\_BV\_1207,2YME\_CWB\_BW\_1207,2YME\_CWB\_BX\_1207,2YME\_CWB\_BY\_1207,2YME\_CWB\_BZ\_1207,2YME\_CWB\_CA\_1207,2YME\_CWB\_CB\_1207,2YME\_CWB\_CC\_1207,2YME\_CWB\_CD\_1207,2YME\_CWB\_CE\_1207,2YME\_CWB\_CF\_1207,2YME\_CWB\_CG\_1207,2YME\_CWB\_CH\_1207,2YME\_CWB\_CI\_1207,2YME\_CWB\_CJ\_1207,2YME\_CWB\_CK\_1207,2YME\_CWB\_CL\_1207,2YME\_CWB\_CM\_1207,2YME\_CWB\_CN\_1207,2YME\_CWB\_CO\_1207,2YME\_CWB\_CP\_1207,2YME\_CWB\_CQ\_1207,2YME\_CWB\_CR\_1207,2YME\_CWB\_CS\_1207,2YME\_CWB\_CT\_1207,2YME\_CWB\_CU\_1207,2YME\_CWB\_CV\_1207,2YME\_CWB\_CW\_1207,2YME\_CWB\_CX\_1207,2YME\_CWB\_CY\_1207,2YME\_CWB\_CZ\_1207,2YME\_CWB\_DA\_1207,2YME\_CWB\_DB\_1207,2YME\_CWB\_DC\_1207,2YME\_CWB\_DD\_1207,2YME\_CWB\_DE\_1207,2YME\_CWB\_DF\_1207,2YME\_CWB\_DG\_1207,2YME\_CWB\_DH\_1207,2YME\_CWB\_DI\_1207,2YME\_CWB\_DJ\_1207,2YME\_CWB\_DK\_1207,2YME\_CWB\_DL\_1207,2YME\_CWB\_DM\_1207,2YME\_CWB\_DN\_1207,2YME\_CWB\_DO\_1207,2YME\_CWB\_DP\_1207,2YME\_CWB\_DQ\_1207,2YME\_CWB\_DR\_1207,2YME\_CWB\_DS\_1207,2YME\_CWB\_DT\_1207,2YME\_CWB\_DU\_1207,2YME\_CWB\_DV\_1207,2YME\_CWB\_DW\_1207,2YME\_CWB\_DX\_1207,2YME\_CWB\_DY\_1207,2YME\_CWB\_DZ\_1207,2YME\_CWB\_EA\_1207,2YME\_CWB\_EB\_1207,2YME\_CWB\_EC\_1207,2YME\_CWB\_ED\_1207,2YME\_CWB\_EE\_1207,2YME\_CWB\_EF\_1207,2YME\_CWB\_EG\_1207,2YME\_CWB\_EH\_1207,2YME\_CWB\_EI\_1207,2YME\_CWB\_EJ\_1207,2YME\_CWB\_EK\_1207,2YME\_CWB\_EL\_1207,2YME\_CWB\_EM\_1207,2YME\_CWB\_EN\_1207,2YME\_CWB\_EO\_1207,2YME\_CWB\_EP\_1207,2YME\_CWB\_EQ\_1207,2YME\_CWB\_ER\_1207,2YME\_CWB\_ES\_1207,2YME\_CWB\_ET\_1207,2YME\_CWB\_EU\_1207,2YME\_CWB\_EV\_1207,2YME\_CWB\_EW\_1207,2YME\_CWB\_EX\_1207,2YME\_CWB\_EY\_1207,2YME\_CWB\_EZ\_1207,2YME\_CWB\_FA\_1207,2YME\_CWB\_FB\_1207,2YME\_CWB\_FC\_1207,2YME\_CWB\_FD\_1207,2YME\_CWB\_FE\_1207,2YME\_CWB\_FF\_1207,2YME\_CWB\_FG\_1207,2YME\_CWB\_FH\_1207,2YME\_CWB\_FI\_1207,2YME\_CWB\_FJ\_1207,2YME\_CWB\_FK\_1207,2YME\_CWB\_FL\_1207,2YME\_CWB\_FM\_1207,2YME\_CWB\_FN\_1207,2YME\_CWB\_FO\_1207,2YME\_CWB\_FP\_1207,2YME\_CWB\_FQ\_1207,2YME\_CWB\_FR\_1207,2YME\_CWB\_FS\_1207,2YME\_CWB\_FT\_1207,2YME\_CWB\_FU\_1207,2YME\_CWB\_FV\_1207,2YME\_CWB\_FW\_1207,2YME\_CWB\_FX\_1207,2YME\_CWB\_FY\_1207,2YME\_CWB\_FZ\_1207,2YME\_CWB\_GA\_1207,2YME\_CWB\_GB\_1207,2YME\_CWB\_GC\_1207,2YME\_CWB\_GD\_1207,2YME\_CWB\_GE\_1207,2YME\_CWB\_GF\_1207,2YME\_CWB\_GH\_1207,2YME\_CWB\_GI\_1207,2YME\_CWB\_GJ\_1207,2YME\_CWB\_GK\_1207,2YME\_CWB\_GL\_1207,2YME\_CWB\_GM\_1207,2YME\_CWB\_GN\_1207,2YME\_CWB\_GO\_1207,2YME\_CWB\_GP\_1207,2YME\_CWB\_GQ\_1207,2YME\_CWB\_GR\_1207,2YME\_CWB\_GS\_1207,2YME\_CWB\_GT\_1207,2YME\_CWB\_GU\_1207,2YME\_CWB\_GV\_1207,2YME\_CWB\_GW\_1207,2YME\_CWB\_GX\_1207,2YME\_CWB\_GY\_1207,2YME\_CWB\_GZ\_1207,2YME\_CWB\_HA\_1207,2YME\_CWB\_HB\_1207,2YME\_CWB\_HC\_1207,2YME\_CWB\_HD\_1207,2YME\_CWB\_HE\_1207,2YME\_CWB\_HF\_1207,2YME\_CWB\_HG\_1207,2YME\_CWB\_HI\_1207,2YME\_CWB\_HJ\_1207,2YME\_CWB\_HK\_1207,2YME\_CWB\_HL\_1207,2YME\_CWB\_HM\_1207,2YME\_CWB\_HN\_1207,2YME\_CWB\_HO\_1207,2YME\_CWB\_HP\_1207,2YME\_CWB\_HQ\_1207,2YME\_CWB\_HR\_1207,2YME\_CWB\_HS\_1207,2YME\_CWB\_HT\_1207,2YME\_CWB\_HU\_1207,2YME\_CWB\_HV\_1207,2YME\_CWB\_HW\_1207,2YME\_CWB\_HX\_1207,2YME\_CWB\_HY\_1207,2YME\_CWB\_HZ\_1207,2YME\_CWB\_IA\_1207,2YME\_CWB\_IB\_1207,2YME\_CWB\_IC\_1207,2YME\_CWB\_ID\_1207,2YME\_CWB\_IE\_1207,2YME\_CWB\_IF\_1207,2YME\_CWB\_IG\_1207,2YME\_CWB\_IH\_1207,2YME\_CWB\_II\_1207,2YME\_CWB\_IJ\_1207,2YME\_CWB\_IK\_1207,2YME\_CWB\_IL\_1207,2YME\_CWB\_IM\_1207,2YME\_CWB\_IN\_1207,2YME\_CWB\_IO\_1207,2YME\_CWB\_IP\_1207,2YME\_CWB\_IQ\_1207,2YME\_CWB\_IR\_1207,2YME\_CWB\_IS\_1207,2YME\_CWB\_IT\_1207,2YME\_CWB\_IU\_1207,2YME\_CWB\_IV\_1207,2YME\_CWB\_IW\_1207,2YME\_CWB\_IX\_1207,2YME\_CWB\_IY\_1207,2YME\_CWB\_IZ\_1207,2YME\_CWB\_JA\_1207,2YME\_CWB\_JB\_1207,2YME\_CWB\_JC\_1207,2YME\_CWB\_JD\_1207,2YME\_CWB\_JE\_1207,2YME\_CWB\_JF\_1207,2YME\_CWB\_JG\_1207,2YME\_CWB\_JH\_1207,2YME\_CWB\_JI\_1207,2YME\_CWB\_JJ\_1207,2YME\_CWB\_JK\_1207,2YME\_CWB\_JL\_1207,2YME\_CWB\_JM\_1207,2YME\_CWB\_JN\_1207,2YME\_CWB\_JO\_1207,2YME\_CWB\_JP\_1207,2YME\_CWB\_JQ\_1207,2YME\_CWB\_JR\_1207,2YME\_CWB\_JS\_1207,2YME\_CWB\_JT\_1207,2YME\_CWB\_JU\_1207,2YME\_CWB\_JV\_1207,2YME\_CWB\_JW\_1207,2YME\_CWB\_JX\_1207,2YME\_CWB\_JY\_1207,2YME\_CWB\_JZ\_1207,2YME\_CWB\_KA\_1207,2YME\_CWB\_KB\_1207,2YME\_CWB\_KC\_1207,2YME\_CWB\_KD\_1207,2YME\_CWB\_KE\_1207,2YME\_CWB\_KF\_1207,2YME\_CWB\_KG\_1207,2YME\_CWB\_KH\_1207,2YME\_CWB\_KI\_1207,2YME\_CWB\_KJ\_1207,2YME\_CWB\_KK\_1207,2YME\_CWB\_KL\_1207,2YME\_CWB\_KM\_1207,2YME\_CWB\_KN\_1207,2YME\_CWB\_KO\_1207,2YME\_CWB\_KP\_1207,2YME\_CWB\_KQ\_1207,2YME\_CWB\_KR\_1207,2YME\_CWB\_KS\_1207,2YME\_CWB\_KT\_1207,2YME\_CWB\_KU\_1207,2YME\_CWB\_KV\_1207,2YME\_CWB\_KW\_1207,2YME\_CWB\_KX\_1207,2YME\_CWB\_KY\_1207,2YME\_CWB\_KZ\_1207,2YME\_CWB\_LA\_1207,2YME\_CWB\_LB\_1207,2YME\_CWB\_LC\_1207,2YME\_CWB\_LD\_1207,2YME\_CWB\_LE\_1207,2YME\_CWB\_LF\_1207,2YME\_CWB\_LG\_1207,2YME\_CWB\_LH\_1207,2YME\_CWB\_LI\_1207,2YME\_CWB\_LJ\_1207,2YME\_CWB\_LK\_1207,2YME\_CWB\_LM\_1207,2YME\_CWB\_LN\_1207,2YME\_CWB\_LO\_1207,2YME\_CWB\_LP\_1207,2YME\_CWB\_LQ\_1207,2YME\_CWB\_LR\_1207,2YME\_CWB\_LS\_1207,2YME\_CWB\_LT\_1207,2YME\_CWB\_LU\_1207,2YME\_CWB\_LV\_1207,2YME\_CWB\_LW\_1207,2YME\_CWB\_LX\_1207,2YME\_CWB\_LY\_1207,2YME\_CWB\_LZ\_1207,2YME\_CWB\_MA\_1207,2YME\_CWB\_MB\_1207,2YME\_CWB\_MC\_1207,2YME\_CWB\_MD\_1207,2YME\_CWB\_ME\_1207,2YME\_CWB\_MF\_1207,2YME\_CWB\_MG\_1207,2YME\_CWB\_MH\_1207,2YME\_CWB\_MI\_1207,2YME\_CWB\_MJ\_1207,2YME\_CWB\_MK\_1207,2YME\_CWB\_ML\_1207,2YME\_CWB\_MM\_1207,2YME\_CWB\_MN\_1207,2YME\_CWB\_MO\_1207,2YME\_CWB\_MP\_1207,2YME\_CWB\_MQ\_1207,2YME\_CWB\_MR\_1207,2YME\_CWB\_MS\_1207,2YME\_CWB\_MT\_1207,2YME\_CWB\_MU\_1207,2YME\_CWB\_MV\_1207,2YME\_CWB\_MW\_1207,2YME\_CWB\_MX\_1207,2YME\_CWB\_MY\_1207,2YME\_CWB\_MZ\_1207,2YME\_CWB\_NA\_1207,2YME\_CWB\_NB\_1207,2YME\_CWB\_NC\_1207,2YME\_CWB\_ND\_1207,2YME\_CWB\_NE\_1207,2YME\_CWB\_NF\_1207,2YME\_CWB\_NG\_1207,2YME\_CWB\_NH\_1207,2YME\_CWB\_NI\_1207,2YME\_CWB\_NJ\_1207,2YME\_CWB\_NK\_1207,2YME\_CWB\_NL\_1207,2YME\_CWB\_NM\_1207,2YME\_CWB\_NO\_1207,2YME\_CWB\_NP\_1207,2YME\_CWB\_NQ\_1207,2YME\_CWB\_NR\_1207,2YME\_CWB\_NS\_1207,2YME\_CWB\_NT\_1207,2YME\_CWB\_NU\_1207,2YME\_CWB\_NV\_1207,2YME\_CWB\_NW\_1207,2YME\_CWB\_NX\_1207,2YME\_CWB\_NY\_1207,2YME\_CWB\_NZ\_1207,2YME\_CWB\_OA\_1207,2YME\_CWB\_OB\_1207,2YME\_CWB\_OC\_1207,2YME\_CWB\_OD\_1207,2YME\_CWB\_OE\_1207,2YME\_CWB\_OF\_1207,2YME\_CWB\_OG\_1207,2YME\_CWB\_OH\_1207,2YME\_CWB\_OI\_1207,2YME\_CWB\_OJ\_1207,2YME\_CWB\_OK\_1207,2YME\_CWB\_OL\_1207,2YME\_CWB\_OM\_1207,2YME\_CWB\_ON\_1207,2YME\_CWB\_OO\_1207,2YME\_CWB\_OP\_1207,2YME\_CWB\_OQ\_1207,2YME\_CWB\_OR\_1207,2YME\_CWB\_OS\_1207,2YME\_CWB\_OT\_1207,2YME\_CWB\_OU\_1207,2YME\_CWB\_OV\_1207,2YME\_CWB\_OW\_1207,2YME\_CWB\_OX\_1207,2YME\_CWB\_OY\_1207,2YME\_CWB\_OZ\_1207,2YME\_CWB\_PA\_1207,2YME\_CWB\_PB\_1207,2YME\_CWB\_PC\_1207,2YME\_CWB\_PD\_1207,2YME\_CWB\_PE\_1207,2YME\_CWB\_PF\_1207,2YME\_CWB\_PG\_1207,2YME\_CWB\_PH\_1207,2YME\_CWB\_PI\_1207,2YME\_CWB\_PJ\_1207,2YME\_CWB\_PK\_1207,2YME\_CWB\_PL\_1207,2YME\_CWB\_PM\_1207,2YME\_CWB\_PN\_1207,2YME\_CWB\_PO\_1207,2YME\_CWB\_PP\_1207,2YME\_CWB\_PQ\_1207,2YME\_CWB\_PR\_1207,2YME\_CWB\_PS\_1207,2YME\_CWB\_PT\_1207,2YME\_CWB\_PU\_1207,2YME\_CWB\_PV\_1207,2YME\_CWB\_PW\_1207,2YME\_CWB\_PX\_1207,2YME\_CWB\_PY\_1207,2YME\_CWB\_PZ\_1207,2YME\_CWB\_QA\_1207,2YME\_CWB\_QB\_1207,2YME\_CWB\_QC\_1207,2YME\_CWB\_QD\_1207,2YME\_CWB\_QE\_1207,2YME\_CWB\_QF\_1207,2YME\_CWB\_QG\_1207,2YME\_CWB\_QH\_1207,2YME\_CWB\_QI\_1207,2YME\_CWB\_QJ\_1207,2YME\_CWB\_QK\_1207,2YME\_CWB\_QL\_1207,2YME\_CWB\_QM\_1207,2YME\_CWB\_QN\_1207,2YME\_CWB\_QO\_1207,2YME\_CWB\_QP\_1207,2YME\_CWB\_QQ\_1207,2YME\_CWB\_QR\_1207,2YME\_CWB\_QS\_1207,2YME\_CWB QT\_1207,2YME\_CWB\_QU\_1207,2YME\_CWB\_QV\_1207,2YME\_CWB\_QW\_1207,2YME\_CWB\_QX\_1207,2YME\_CWB\_QY\_1207,2YME\_CWB\_QZ\_1207,2YME\_CWB\_RA\_1207,2YME\_CWB\_RB\_1207,2YME\_CWB\_RC\_1207,2YME\_CWB\_RD\_1207,2YME\_CWB\_RE\_1207,2YME\_CWB\_RF\_1207,2YME\_CWB\_RG\_1207,2YME\_CWB\_RH\_1207,2YME\_CWB\_RI\_1207,2YME\_CWB\_RJ\_1207,2YME\_CWB\_RK\_1207,2YME\_CWB\_RL\_1207,2YME\_CWB\_RM\_1207,2YME\_CWB\_RN\_1207,2YME\_CWB\_RO\_1207,2YME\_CWB\_RP\_1207,2YME\_CWB\_RQ\_1207,2YME\_CWB\_RR\_1207,2YME\_CWB\_RS\_1207,2YME\_CWB\_RT\_1207,2YME\_CWB\_RU\_1207,2YME\_CWB\_RV\_1207,2YME\_CWB\_RW\_1207,2YME\_CWB\_RX\_1207,2YME\_CWB\_RY\_1207,2YME\_CWB\_RZ\_1207,2YME\_CWB\_SA\_1207,2YME\_CWB\_SB\_1207,2YME\_CWB\_SC\_1207,2YME\_CWB\_SD\_1207,2YME\_CWB\_SE\_1207,2YME\_CWB\_SF\_1207,2YME\_CWB\_SG\_1207,2YME\_CWB\_SH\_1207,2YME\_CWB\_SI\_1207,2YME\_CWB\_SJ\_1207,2YME\_CWB\_SK\_1207,2YME\_CWB\_SL\_1207,2YME\_CWB\_SM\_1207,2YME\_CWB\_SN\_1207,2YME\_CWB\_SO\_1207,2YME\_CWB\_SP\_1207,2YME\_CWB\_SQ\_1207,2YME\_CWB\_SR\_1207,2YME\_CWB\_SS\_1207,2YME\_CWB\_ST\_1207,2YME\_CWB\_SU\_1207,2YME\_CWB\_SV\_1207,2YME\_CWB\_SW\_1207,2YME\_CWB\_SX\_1207,2YME\_CWB\_SY\_1207,2YME\_CWB\_SZ\_1207,2YME\_CWB\_TA\_1207,2YME\_CWB\_TB\_1207,2YME\_CWB\_TC\_1207,2YME\_CWB\_TD\_1207,2YME\_CWB\_TE\_1207,2YME\_CWB\_TF\_1207,2YME\_CWB\_TG\_1207,2YME\_CWB\_TH\_1207,2YME\_CWB\_TI\_1207,2YME\_CWB\_TJ\_1207,2YME\_CWB\_TK\_1207,2YME\_CWB\_TL\_1207,2YME\_CWB\_TM\_1207,2YME\_CWB\_TN\_1207,2YME\_CWB\_TO\_1207,2YME\_CWB\_TP\_1207,2YME\_CWB\_TQ\_1207,2YME\_CWB\_TR\_1207,2YME\_CWB\_TS\_1207,2YME\_CWB\_TT\_1207,2YME\_CWB\_TU\_1207,2YME\_CWB\_TV\_1207,2YME\_CWB\_TW\_1207,2YME\_CWB\_TX\_1207,2YME\_CWB\_TY\_1207,2YME\_CWB\_TZ\_1207,2YME\_CWB\_UA\_1207,2YME\_CWB\_UB\_1207,2YME\_CWB\_UC\_1207,2YME\_CWB\_UD\_1207,2YME\_CWB\_UE\_1207,2YME\_CWB\_UF\_1207,2YME\_CWB\_UG\_1207,2YME\_CWB\_UH\_1207,2YME\_CWB\_UI\_1207,2YME\_CWB\_UJ\_1207,2YME\_CWB\_UK\_1207,2YME\_CWB\_UL\_1207,2YME\_CWB\_UM\_1207,2YME\_CWB\_UN\_1207,2YME\_CWB\_UO\_1207,2YME\_CWB\_UP\_1207,2YME\_CWB\_UQ\_1207,2YME\_CWB\_UR\_1207,2YME\_CWB\_US\_1207,2YME\_CWB\_UT\_1207,2YME\_CWB\_UV\_1207,2YME\_CWB\_UW\_1207,2YME\_CWB\_UX\_1207,2YME\_CWB\_UY\_1207,2YME\_CWB\_UZ\_1207,2YME\_CWB\_VA\_1207,2YME\_CWB\_VB\_1207,2YME\_CWB\_VC\_1207,2YME\_CWB\_VD\_1207,2YME\_CWB\_VE\_1207,2YME\_CWB\_VF\_1207,2YME\_CWB\_VG\_1207,2YME\_CWB\_VH\_1207,2YME\_CWB\_VI\_1207,2YME\_CWB\_VJ\_1207,2YME\_CWB\_VK\_1207,2YME\_CWB\_VL\_1207,2YME\_CWB\_VM\_1207,2YME\_CWB\_VN\_1207,2YME\_CWB\_VO\_1207,2YME\_CWB\_VP\_1207,2YME\_CWB\_VQ\_1207,2YME\_CWB\_VR\_1207,2YME\_CWB\_VS\_1207,2YME\_CWB\_VT\_1207,2YME\_CWB\_VU\_1207,2YME\_CWB\_VV\_1207,2YME\_CWB\_VW\_1207,2YME\_CWB\_VX\_1207,2YME\_CWB\_VY\_1207,2YME\_CWB\_VZ\_1207,2YME\_CWB\_WA\_1207,2YME\_CWB\_WB\_1207,2YME\_CWB\_WC\_1207,2YME\_CWB\_WD\_1207,2YME\_CWB\_WE\_1207,2YME\_CWB\_WF\_1207,2YME\_CWB\_WG\_1207,2YME\_CWB\_WH\_1207,2YME\_CWB\_WI\_1207,2YME\_CWB\_WJ\_1207,2YME\_CWB\_WK\_1207,2YME\_CWB\_WL\_1207,2YME\_CWB\_WM\_1207,2YME\_CWB\_WN\_1207,2YME\_CWB\_WO\_1207,2YME\_CWB\_WP\_1207,2YME\_CWB\_WQ\_1207,2YME\_CWB\_WR\_1207,2YME\_CWB\_WS\_1207,2YME\_CWB\_WT\_1207,2YME\_CWB\_WU\_1207,2YME\_CWB\_WV\_1207,2YME\_CWB\_WW\_1207,2YME\_CWB\_WX\_1207,2YME\_CWB\_WY\_1207,2YME\_CWB\_WZ\_1207,2YME\_CWB\_XA\_1207,2YME\_CWB\_XB\_1207,2YME\_CWB\_XC\_1207,2YME\_CWB\_XD\_1207,2YME\_CWB\_XE\_1207,2YME\_CWB\_XF\_1207,2YME\_CWB\_XG\_1207,2YME\_CWB\_XH\_1207,2YME\_CWB\_XI\_1207,2YME\_CWB\_XJ\_1207,2YME\_CWB\_XK\_1207,2YME\_CWB\_XL\_1207,2YME\_CWB\_XM\_1207,2YME\_CWB\_XN\_1207,2YME\_CWB\_XO\_1207,2YME\_CWB\_XP\_1207,2YME\_CWB\_XQ\_1207,2YME\_CWB\_XR\_1207,2YME\_CWB\_XS\_1207,2YME\_CWB\_XT\_1207,2YME\_CWB\_XU\_1207,2YME\_CWB\_XV\_1207,2YME\_CWB\_XW\_1207,2YME\_CWB\_XX\_1207,2YME\_CWB\_XY\_1207,2YME\_CWB\_XZ\_1207,2YME\_CWB\_YA\_1207,2YME\_CWB\_YB\_1207,2YME\_CWB\_YC\_1207,2YME\_CWB\_YD\_1207,2YME\_CWB\_YE\_1207,2YME\_CWB\_YF\_1207,2YME\_CWB\_YG\_1207,2YME\_CWB\_YH\_1207,2YME\_CWB\_YI\_1207,2YME\_CWB\_YJ\_1207,2YME\_CWB\_YK\_1207,2YME\_CWB\_YL\_1207,2YME\_CWB\_YM\_1207,2YME\_CWB\_YN\_1207,2YME\_CWB\_YO\_1207,2YME\_CWB\_YP\_1207,2YME\_CWB\_YQ\_1207,2YME\_CWB\_YR\_1207,2YME\_CWB\_YS\_1207,2YME\_CWB\_YT\_1207,2YME\_CWB\_YU\_1207,2YME\_CWB\_YV\_1207,2YME\_CWB\_YW\_1207,2YME\_CWB\_YX\_1207,2YME\_CWB\_YZ\_1207,2YME\_CWB\_ZA\_1207,2YME\_CWB\_ZB\_1207,2YME\_CWB\_ZC\_1207,2YME\_CWB\_ZD\_1207,2YME\_CWB\_ZE\_1207,2YME\_CWB\_ZF\_1207,2YME\_CWB\_ZG\_1207,2YME\_CWB\_ZH\_1207,2YME\_CWB\_ZI\_1207,2YME\_CWB\_ZJ\_1207,2YME\_CWB\_ZK\_1207,2YME\_CWB\_ZL\_1207,2YME\_CWB\_ZM\_1207,2YME\_CWB\_ZN\_1207,2YME\_CWB\_ZO\_1207,2YME\_CWB\_ZP\_1207,2YME\_CWB\_ZQ\_1207,2YME\_CWB\_ZR\_1207

CWB\_H\_1207,2YME\_CWB\_J\_1207,2YOO\_K2B\_A\_1404,2YOO\_K2B\_B\_1404,2YOO\_K2B\_C\_1404,2YOO\_K2B\_D\_1404,2YXS\_LAT\_A\_401,2YY1\_NLC\_A\_161,2Z8E\_MES\_A\_11,2Z8E\_MES\_B\_12,2Z92\_ENE\_A\_1,2Z93\_END\_C\_1,2Z97\_7HE\_A\_417,2Z97\_CAM\_A\_422,2ZB1\_GK4\_A\_361,2ZBF\_TG1\_A\_1003,2ZDK\_50U\_A\_501,2ZDM\_46U\_A\_501,2ZDN\_49U\_A\_501,2ZFT\_10U\_A\_501,2ZHD\_12U\_A\_501,2ZIF\_SAM\_B\_298,2ZKJ\_ADP\_B\_501,2ZM1\_KSF\_A\_513,2ZM3\_575\_A\_1,2ZM3\_575\_C\_1,2ZQ1\_11U\_A\_501,2ZQ2\_13U\_A\_501,2ZRU\_FMN\_A\_669,2ZRU\_FMN\_B\_669,2ZRU\_FMN\_C\_669,2ZRU\_FMN\_D\_669,2ZSC\_BTN\_A\_301,2ZSC\_BTN\_B\_301,2ZWZ\_ZWZ\_A\_901,2ZWZ\_ZWZ\_B\_902,2ZYN\_BCD\_A\_901,3A1C\_ACP\_B\_997,3A1D\_ADP\_A\_997,3A1E\_ACP\_A\_997,3A1E\_ACP\_B\_997,3A1S\_GDP\_A\_1,3A1S\_GDP\_B\_2,3A1T\_GDP\_A\_1,3A20\_FMN\_A\_123,3A20\_FMN\_B\_123,3A5Y\_KAA\_A\_1990,3A5Y\_KAA\_B\_1991,3A6Q\_FMN\_A\_123,3A6Q\_FMN\_B\_123,3A6R\_FMN\_B\_123,3A6R\_FMN\_D\_123,3A6T\_8OG\_A\_134,3A73\_PJ2\_A\_1012,3A73\_PJ2\_B\_1011,3AAS\_GUS\_A\_1001,3ACL\_3F1\_A\_302,3AD8\_PYC\_B\_801,3ADS\_IMN\_B\_3,3ADV\_SRO\_A\_1,3ADV\_SRO\_B\_3,3ADV\_SRO\_C\_4,3ADW\_MYL\_A\_3,3AJ5\_NGA\_A\_2000,3AJ5\_NGA\_B\_2000,3AKM\_11D\_B\_132,3AKM\_11D\_C\_132,3ALT\_MLB\_A\_301,3ALT\_MLB\_B\_301,3ALT\_MLB\_D\_301,3AM7\_MGP\_A\_100,3AMA\_SKE\_A\_351,3AMB\_VX6\_A\_351,3AO1\_BZX\_A\_213,3AO1\_BZX\_B\_214,3AO1\_BZX\_C\_1,3AO2\_AVX\_A\_1,3AO2\_AVX\_B\_1,3AO4\_833\_A\_1,3AO4\_833\_B\_1,3AO5\_BBY\_A\_213,3AOX\_EMH\_A\_901,3AP4\_LBT\_A\_155,3AP4\_LBT\_B\_155,3AP4\_LBT\_C\_155,3AP6\_LAT\_A\_155,3AP6\_LAT\_B\_155,3AP6\_LAT\_C\_155,3AP7\_LAT\_A\_155,3AQA\_BYH\_A\_201,3AQT\_RCO\_A\_230,3AQT\_RCO\_B\_230,3AR3\_TG1\_A\_100,3AR4\_ATP\_A\_1002,3AR5\_TG1\_A\_1003,3AR5\_TM1\_A\_1002,3AR6\_TG1\_A\_1003,3AR7\_TG1\_A\_1003,3ARP\_DEQ\_A\_606,3ARQ\_DM5\_A\_606,3ARR\_PNX\_A\_606,3ARR\_PNX\_B\_607,3ART\_DEQ\_A\_606,3ART\_DEQ\_B\_607,3ART\_DEQ\_C\_608,3ARU\_PNX\_A\_606,3ARU\_PNX\_B\_607,3ARU\_PNX\_C\_608,3ARV\_SA\_U\_A\_607,3ARX\_POY\_A\_606,3ARX\_POY\_B\_607,3ARY\_I5I\_A\_606,3ARY\_I5I\_B\_607,3ARZ\_I5I\_A\_606,3ARZ\_I5I\_B\_607,3AS0\_SAU\_A\_606,3AS0\_SAU\_B\_607,3AT4\_CCK\_A\_336,3ATU\_ADP\_A\_1452,3ATV\_ADP\_A\_1452,3AXZ\_ADN\_A\_401,3AY9\_ADP\_A\_1452,3AYE\_LAT\_A\_0,3B0W\_DGX\_A\_1,3B0W\_DGX\_B\_1,3B24\_B2J\_A\_237,3B25\_B2K\_A\_1,3B27\_B2T\_A\_1,3B28\_B2X\_A\_237,3B2Q\_ATP\_A\_461,3B2T\_M33\_A\_1996,3B2T\_M33\_B\_1996,3B4P\_3B4\_A\_500,3B4P\_3B4\_B\_500,3B4Y\_FLC\_B\_337,3B50\_SLB\_A\_311,3B5J\_12D\_A\_708,3B6H\_MXD\_A\_551,3B78\_NAD\_B\_700,3B78\_NAD\_D\_701,3B78\_NAD\_F\_702,3B82\_NAD\_B\_700,3B82\_NAD\_D\_701,3B82\_NAD\_F\_702,3B8H\_NAD\_B\_700,3B8H\_NAD\_D\_701,3B99\_U51\_A\_700,3B99\_U51\_B\_701,3B99\_U51\_C\_702,3B99\_U51\_D\_700,3B99\_U51\_E\_701,3BBF\_GDP\_B\_160,3BBF\_GDP\_C\_160,3BBF\_GDP\_D\_160,3BBF\_GDP\_E\_160,3BBF\_GDP\_F\_160,3BEN\_LEH\_A\_500,3BEN\_LEH\_B\_500,3BEX\_PAU\_A\_248,3BEX\_PAU\_B\_248,3BEX\_PAU\_C\_248,3BEX\_PAU\_D\_248,3BEX\_PAU\_E\_248,3BF1\_ADP\_A\_247,3BF1\_ADP\_B\_247,3BF1\_ADP\_C\_247,3BF1\_ADP\_D\_247,3BF1\_ADP\_E\_247,3BF1\_ADP\_F\_247,3BF1\_PAU\_B\_248,3BF1\_PAU\_C\_248,3BF1\_PAU\_E\_248,3BF1\_PAU\_F\_248,3BIR\_2GP\_A\_105,3BJM\_BJM\_A\_1,3BJM\_BJM\_B\_2,3BL1\_BL1\_A\_300,3BPX\_SAL\_A\_257,3BRA\_AEF\_A\_394,3BRN\_SRO\_A\_158,3BRN\_SRO\_B\_158,3BU1\_HSM\_A\_301,3BUF\_AEG\_A\_394,3BUG\_AEH\_A\_394,3BUH\_AED\_A\_394,3BVA\_2\_NC\_B\_200,3BVB\_017\_B\_401,3BWJ\_ARX\_A\_352,3BWK\_C1P\_A\_300,3BWK\_C1P\_B\_300,3BWK\_C1P\_C\_300,3BWK\_C1P\_D\_300,3BXE\_13P\_B\_401,3BXF\_13P\_B\_401,3BXF\_FBP\_A\_401,3BXG\_BG6\_A\_401,3BXG\_BG6\_B\_401,3BXH\_F6P\_A\_401,3BXH\_F6P\_B\_401,3BYO\_AM9\_A\_1,3C2R\_PHT\_A\_300,3C2R\_PHT\_B\_301,3C2V\_PRP\_A\_300,3C4H\_DRL\_A\_601,3C79\_IM4\_B\_302,3C79\_IM4\_C\_303,3C7Q\_XIN\_A\_1172,3C84\_TH4\_A\_301,3C84\_TH4\_B\_302,3C84\_TH4\_C\_303,3C84\_TH4\_D\_304,3C8E\_GSH\_A\_289,3C8E\_GSH\_B\_290,3C8E\_GSH\_C\_290,3C9E\_E64\_A\_308,3CAJ\_CL\_A\_263,3CAJ\_EZL\_A\_265,3CAQ\_NDP\_B\_327,3CB0\_FMN\_A\_200,3CCT\_3HI\_B\_1,3CCT\_3HI\_C\_2,3CCT\_3HI\_D\_4,3CCW\_4HI\_B\_1,3CCW\_4HI\_C\_2,3CCW\_4HI\_D\_3,3CCZ\_5HI\_A\_876,3CCZ\_5HI\_B\_876,3CCZ\_5HI\_C\_876,3CCZ\_5HI\_D\_876,3CD0\_6HI\_B\_1,3CD0\_6HI\_C\_2,3CD0\_6HI\_D\_3,3CD5\_7HI\_B\_1,3CD5\_7HI\_C\_2,3CD5\_7HI\_D\_3,3CD5\_7HI\_E\_4,3CD7\_882\_A\_2,3CD7\_882\_B\_3,3CD7\_882\_C\_4,3CD7\_882\_D\_5,3CDA\_8HI\_A\_2,3CDA\_8HI\_B\_3,3CDA\_8HI\_C\_4,3CDA\_8HI\_D\_5,3CDB\_9HI\_A\_1,3CDB\_9HI\_B\_2,3CDB\_9HI\_C\_3,3CDB\_9HI\_D\_4,3CEM\_AVD\_A\_833,3CEM\_AVD\_B\_833,3CFN\_2AN\_A\_1,3CFN\_2AN\_B\_1,3CFQ\_DIF\_A\_1,3CFQ\_DIF\_B\_1,3CFT\_5NS\_A\_1,3CJ2\_SX3\_A\_571,3CJ2\_SX3\_B\_571,3CJ4\_SX5\_A\_571,3CJ4\_SX5\_B\_571,3CJ5\_SX6\_A\_571,3CJ5\_SX6\_B\_571,3CK7\_ACX\_B\_68,3CK7\_ACX\_C\_689,3CK8\_BCD\_A\_800,3CK8\_BCD\_B\_900,3CKB\_MLR\_A\_903,3CKB\_MLR\_B\_904,3CL\_A\_CLM\_A\_221,3CLP\_CMP\_A\_1,3CLP\_CMP\_B\_2,3COW\_52H\_B\_402,3COY\_53H\_A\_301,3COY\_53H\_B\_302,3COZ\_54H\_A\_401,3COZ\_54H\_B\_402,3CR4\_PNT\_X\_102,3CR5\_PNT\_X\_94,3CRZ\_NAP\_A\_305,3CS9\_NIL\_A\_600,3CS9\_NIL\_B\_600,3CS9\_NIL\_C\_600,3CUK\_4P5\_A\_402,3CUK\_4P5\_B\_402,3CUK\_4P5\_C\_402,3CUK\_4P5\_D\_402,3CWK\_REA\_A\_300,3CYU\_OCR\_A\_263,3CYW\_017\_A\_201,3CYX\_ROC\_A\_201,3CZ\_9OD\_A\_124,3CZ\_9OD\_B\_121,3CZ0\_9OD\_A\_124,3CZ0\_9OD\_B\_121,3CZ0\_9OD\_C\_122,3CZ1\_NBB\_A\_122,3CZ1\_NBB\_B\_122,3CZ1\_NBB\_C\_123,3D0B\_SNX\_A\_233,3D0E\_G93\_A\_1,3D0E\_G93\_B\_2,3D1Y\_R\_OC\_A\_201,3D1Z\_017\_B\_201,3D2E\_ATP\_C\_1001,3D2R\_ADP\_A\_501,3D2R\_ADP\_B\_501,3D2T\_1FL\_A\_5,3D2T\_1FL\_B\_500,3D4F\_LN1\_A\_601,3D76\_NBB\_A\_121,3D78\_NBB\_A\_120,3D78\_NBB\_B\_120,3D78\_NBB\_C\_121,3D7F\_YBY\_A\_1,3D7K\_D7K\_A\_572,3D7K\_D7K\_B\_572,3D91\_REM\_A\_350,3D91\_REM\_B\_350,3DA9\_44U\_B\_1,3DC3\_AZM\_A\_263,3DCW\_EZL\_A\_301,3DD0\_EZL\_A\_301,3DDQ\_RRC\_A\_299,3DDQ\_RRC\_B\_299,3DF9\_DF9\_A\_233,3DF9\_DF9\_B\_233,3DGL\_ATP\_A\_81,3DGO\_ATP\_A\_82,3DKF\_SX8\_A\_1,3DKG\_SX8\_B\_1,3DKJ\_PRP\_A\_501,3DLA\_NXX\_A\_680,3DLA\_NXX\_B\_680,3DLA\_NXX\_C\_680,3DMX\_



BNZ\_A\_900,3DNT\_ATP\_A\_500,3DNT\_ATP\_B\_501,3DP4\_AMQ\_A\_374,3DP9\_BIG\_A\_301,3DP9\_BIG\_C\_301,3DRC\_MTX\_A\_161,3DRC\_MTX\_B\_361,3DST\_GRG\_B\_334,3DSZ\_LIZ\_A\_187,3DZT\_EAH\_A\_305,3E3C\_HHG\_A\_150,3E3C\_HHG\_B\_150,3E5A\_VX6\_A\_500,3E5U\_3C4\_A\_501,3E5U\_3C4\_A\_505,3E5U\_3C4\_B\_503,3E5U\_3C4\_C\_504,3E5U\_3C4\_D\_502,3E64\_5B3\_A\_1,3E6V\_ABH\_A\_552,3E6Y\_CW1\_A\_261,3E6Y\_CW1\_B\_261,3E7F\_6PG\_A\_843,3E7F\_6PG\_B\_843,3E85\_BSU\_A\_158,3E85\_BSU\_A\_159,3E85\_BSU\_A\_160,3E85\_BSU\_A\_161,3EBL\_GA4\_A\_401,3EBL\_GA4\_B\_401,3EBL\_GA4\_C\_401,3EBL\_GA4\_D\_401,3EBL\_GA4\_E\_401,3EBL\_GA4\_F\_401,3EBS\_N4E\_A\_1,3EBS\_N4E\_B\_1,3EBS\_N4E\_D\_1,3ED0\_EMO\_A\_163,3ED0\_EMO\_C\_161,3EEB\_IHP\_A\_210,3EFL\_706\_A\_501,3EFL\_706\_B\_502,3EFS\_ATP\_A\_1001,3EFS\_BTN\_B\_2001,3EKD\_PAM\_A\_471,3EKP\_478\_C\_200,3EKT\_017\_B\_200,3EKT\_017\_D\_200,3EKV\_478\_A\_200,3EKW\_DR7\_B\_100,3EKX\_1UN\_B\_201,3EKY\_DR7\_A\_100,3EL0\_1UN\_A\_201,3EL4\_ROC\_A\_100,3EL5\_1UN\_B\_201,3EL9\_DR7\_A\_100,3ELC\_F01\_A\_901,3ELC\_F01\_B\_902,3ELC\_F01\_C\_903,3EM3\_478\_B\_200,3EM4\_DR7\_A\_100,3EM4\_DR7\_V\_100,3EQG\_4BM\_A\_1,3ERN\_CAR\_B\_900,3ERN\_CAR\_C\_900,3ERN\_CAR\_D\_900,3ERN\_CAR\_E\_900,3EUF\_BAU\_A\_400,3EUF\_BAU\_B\_400,3EUF\_BAU\_C\_400,3EVD\_GTP\_A\_901,3EW2\_BTN\_A\_400,3EW2\_BTN\_C\_600,3EW2\_BTN\_D\_700,3EW2\_BTN\_F\_900,3EW2\_BTN\_G\_350,3EXE\_TPP\_E\_1011,3EXE\_TPP\_G\_1008,3EXH\_TPP\_A\_1502,3EXH\_TPP\_C\_1502,3EXH\_TPP\_E\_1502,3EXH\_TPP\_G\_1502,3EYG\_MI1\_A\_1,3F15\_HS1\_A\_0,3F16\_HS3\_A\_0,3F17\_HS4\_A\_0,3F18\_HS5\_A\_0,3F1A\_HS7\_A\_0,3F33\_PFL\_A\_2001,3F34\_DIE\_A\_2001,3F35\_DIE\_A\_2001,3F36\_IP0\_A\_2001,3F37\_2MY\_A\_2001,3F38\_2MY\_A\_2001,3F3T\_1AU\_A\_1,3F3T\_1AU\_A\_534,3F3U\_1AW\_A\_1,3F3U\_1AW\_A\_534,3F6E\_8PA\_X\_602,3F78\_ICF\_A\_1,3F78\_ICF\_B\_2,3F80\_6HN\_A\_551,3F80\_6HN\_A\_552,3F8F\_DM1\_A\_127,3FAT\_AMQ\_A\_427,3FAT\_AMQ\_C\_429,3FC1\_52P\_X\_362,3FEG\_HC7\_A\_1,3FFA\_GSP\_A\_1,3FGC\_FMN\_A\_3402,3FH\_B\_GAB\_A\_601,3FHE\_28P\_A\_612,3FJ7\_PEQ\_A\_301,3FJ7\_PEQ\_B\_301,3FJG\_3PG\_A\_301,3FJG\_3PG\_B\_301,3FJG\_3PG\_C\_301,3FJG\_3PG\_D\_301,3FJX\_S3P\_A\_428,3FK1\_GPF\_A\_429,3FK1\_S3P\_A\_428,3FK7\_4DM\_A\_210,3FK7\_4DM\_B\_210,3FLS\_FLS\_A\_361,3FLW\_FLW\_A\_361,3FQS\_585\_A\_1,3FSJ\_D7K\_X\_601,3FSK\_RO6\_A\_450,3FSM\_2NC\_A\_204,3FTX\_BES\_A\_720,3FTX\_RE2\_A\_710,3FUC\_9D9\_B\_301,3FUE\_11S\_A\_710,3FUE\_BES\_A\_720,3FUH\_5H1\_A\_710,3FUH\_BES\_A\_720,3FUP\_MI1\_A\_1,3FUP\_MI1\_B\_1,3FW4\_CAQ\_A\_180,3FW4\_CAQ\_C\_180,3FZL\_3FD\_A\_401,3FZN\_D7K\_B\_602,3FZN\_D7K\_C\_604,3FZY\_IHP\_A\_8000,3FZY\_IHP\_B\_8001,3G08\_FEE\_A\_286,3G15\_HC6\_A\_603,3G15\_HC6\_B\_603,3G3E\_G3E\_B\_353,3G3E\_G3E\_C\_353,3G3E\_G3E\_D\_353,3G5D\_1N1\_A\_1,3G5D\_1N1\_B\_1,3GA5\_RGG\_A\_400,3GAY\_P6T\_A\_327,3GAY\_P6T\_B\_329,3GCP\_SB2\_A\_361,3GCS\_BAX\_A\_401,3GCU\_R48\_B\_401,3GCV\_SS6\_A\_361,3GDQ\_AD\_P\_A\_388,3GF2\_SAL\_A\_147,3GFD\_IYR\_B\_302,3GHW\_GHW\_A\_187,3GK1\_32A\_A\_94,3GK2\_27A\_A\_94,3GK4\_53A\_X\_94,3GKZ\_B40\_A\_500,3GM0\_B41\_A\_600,3GNI\_ATP\_B\_1,3GNW\_XNC\_A\_579,3GNW\_XNC\_B\_579,3GPO\_NIL\_A\_1,3GPB\_G1P\_A\_900,3GPB\_G1P\_A\_901,3GPO\_APR\_A\_161,3GPO\_APR\_B\_161,3GPO\_APR\_C\_161,3GPO\_APR\_D\_161,3GR6\_NAP\_A\_361,3GR6\_NAP\_D\_257,3GR6\_NAP\_G\_257,3GR6\_NAP\_J\_257,3GR6\_TCL\_A\_371,3GR6\_TCL\_D\_258,3GR6\_TCL\_G\_258,3GUK\_MBN\_A\_501,3GUK\_MB\_N\_B\_501,3GUM\_PXY\_A\_501,3GUM\_PXY\_B\_501,3GUO\_IPH\_A\_501,3GUO\_IPH\_B\_501,3GUS\_N11\_B\_211,3GUZ\_PAF\_A\_178,3GUZ\_PAF\_B\_177,3GVU\_STI\_A\_1001,3GVU\_STI\_A\_1002,3GW9\_VNI\_A\_490,3GW9\_VNI\_C\_490,3GWS\_T3\_X\_500,3GX0\_GDS\_A\_301,3GY2\_BRN\_A\_1,3GY3\_PNT\_A\_246,3GY4\_PBZ\_A\_1,3GY5\_BRN\_A\_246,3GY6\_BRN\_A\_1,3GY7\_BEN\_A\_1,3GY8\_BRN\_A\_1,3GZ8\_APR\_A\_302,3GZ8\_APR\_B\_302,3GZ8\_APR\_C\_302,3H0A\_9RA\_A\_500,3H0A\_D30\_D\_500,3H1X\_IMN\_A\_301,3H26\_B56\_B\_902,3H2K\_BOG\_A\_398,3H2K\_BOG\_A\_399,3H78\_BE2\_A\_350,3H78\_BE2\_B\_350,3H78\_BE2\_C\_351,3H7R\_NAP\_A\_401,3H7U\_NAP\_A\_401,3H7W\_018\_A\_1,3H82\_020\_A\_351,3HAU\_2NC\_A\_0,3HAW\_2NC\_B\_0,3HBO\_2NC\_A\_0,3HCM\_S45\_A\_94,3HDK\_2NC\_B\_0,3HDQ\_GDU\_A\_500,3HDQ\_GDU\_B\_500,3HDQ\_GDU\_C\_500,3HDQ\_GDU\_D\_500,3HDQ\_GDU\_E\_500,3HDQ\_GDU\_F\_500,3HDQ\_GDU\_G\_500,3HDQ\_GDU\_H\_500,3HDQ\_GDU\_I\_500,3HDQ\_GDU\_J\_500,3HDY\_GDU\_A\_500,3HDY\_GDU\_B\_500,3HDY\_GDU\_C\_500,3HDY\_GDU\_D\_500,3HDY\_GDU\_E\_500,3HDY\_GDU\_F\_500,3HDY\_GDU\_G\_500,3HDY\_GDU\_H\_500,3HDY\_GDU\_I\_500,3HDY\_GDU\_J\_500,3HEC\_STI\_A\_1,3HEG\_BAX\_A\_1,3HGM\_ATP\_A\_148,3HGM\_ATP\_B\_148,3HGM\_ATP\_C\_148,3HGM\_ATP\_D\_148,3HJO\_EAA\_A\_211,3HKU\_TOR\_A\_300,3HKW\_IX6\_A\_579,3HKW\_IX6\_B\_579,3HKW\_IX6\_C\_579,3HKY\_IX6\_B\_579,3HMO\_STU\_A\_1,3HP5\_52P\_A\_401,3HP8\_SUC\_A\_108,3HP8\_SUC\_A\_109,3HP8\_SUC\_B\_109,3HPI\_SUC\_A\_371,3HPI\_SUC\_B\_375,3HQR\_OGA\_A\_600,3HS4\_AZM\_A\_701,3HS4\_AZM\_A\_702,3HS4\_AZM\_A\_703,3HS5\_ACD\_A\_1,3HT6\_JZ0\_A\_167,3HT8\_JZ2\_A\_167,3HTB\_JZ4\_A\_167,3HU3\_AGS\_B\_800,3HU8\_261\_A\_167,3HUA\_JZ9\_A\_165,3HUK\_J0Z\_A\_166,3HUQ\_J1Z\_A\_164,3HV6\_R39\_A\_361,3HV8\_C2E\_A\_900,3HVG\_EV0\_A\_441,3HVG\_EV0\_B\_441,3HVG\_EV0\_C\_442,3HWW\_AKG\_A\_557,3HX3\_RET\_A\_400,3HXG\_GTA\_A\_1,3HXL\_GTG\_A\_501,3HY8\_FMN\_A\_390,3HZF\_B72\_A\_1,3HZL\_6PC\_A\_399,3HZM\_KDO\_B\_303,3I33\_AD\_P\_A\_388,3I73\_AD\_P\_A\_589,3I7S\_PYR\_B\_302,3I9G\_S1P\_L\_401,3IAI\_AZM\_B\_263,3IAI\_AZM\_C\_263,3IAI\_AZM\_D\_263,3IAI\_PO4\_A\_600,3IAI\_PO4\_A\_601,3IAI\_PO4\_B\_600,3IAI\_PO4\_C\_600,3IAI\_PO4\_D\_600,3IAW\_2NC\_A\_204,3IAZ\_AIN\_A\_1202,3IB1\_IMN\_A\_701,3IB2\_IBP\_A\_3960,3IE3\_N11\_A\_211,3IE3\_N11\_B\_211,3IJG\_AVR\_C\_200,3IJH\_KO2\_B\_214,3IJH\_KO2\_C\_214,3IK3\_OLI\_A\_1,3IK3\_OLI\_B\_2,3IKF\_717\_A\_163,3IKF\_717\_A\_202,3IKF\_717\_B\_202,3ILZ\_B72\_A\_1,3IMC\_BZ3\_A\_702,3IMC\_BZ3\_B\_701,3IME\_BZ2\_A\_301,3IME\_BZ2\_B\_302,3IMG\_BZ2\_A\_301,3IMG\_BZ2\_B\_302,3IMG\_BZ3\_A\_401,3IOB\_A4D\_A\_301,3IOB\_A4D\_B\_302,3IOC\_A5D\_A\_301,3IOC\_A5D\_B\_302,3IOD\_A6D\_A\_3

02,3IOD\_A6D\_B\_301,3IOE\_A7D\_A\_901,3IOE\_A7D\_B\_902,3IP9\_ABU\_A\_357,3ISJ\_A8D\_B\_305,3IUB\_FG  
2\_A\_303,3IUB\_FG2\_B\_302,3IUC\_AD\_P\_A\_1,3IUC\_AD\_P\_C\_1,3IUE\_FG3\_A\_302,3IUE\_FG3\_A\_303,3IUE\_  
FG3\_B\_302,3IVC\_FG4\_B\_302,3IVG\_FG5\_B\_305,3IVX\_FG6\_A\_302,3IVX\_FG6\_A\_303,3IVX\_FG6\_B\_302,  
3IW2\_EKO\_A\_665,3IW5\_DF3\_A\_362,3IW6\_PP0\_A\_361,3IW8\_HIZ\_A\_361,3IX1\_NFM\_A\_401,3IX1\_NFM  
\_B\_401,3JQM\_GTP\_A\_158,3JQM\_GTP\_B\_158,3JQM\_GTP\_C\_158,3JQM\_GTP\_D\_158,3JQM\_GTP\_E\_158,  
3JQM\_GTP\_F\_158,3JQM\_GTP\_G\_158,3JQM\_GTP\_H\_158,3JQM\_GTP\_I\_158,3JRS\_A8S\_A\_1,3JRS\_A8S\_  
B\_2,3JRX\_S1A\_A\_1000,3JUK\_UPG\_A\_282,3JUK\_UPG\_C\_283,3JUN\_AJD\_A\_500,3JUN\_AJD\_B\_500,3JU  
N\_AKD\_A\_600,3JUN\_AKD\_B\_600,3JUO\_AJD\_A\_500,3JUP\_AKD\_A\_500,3JUP\_AKD\_B\_500,3JUQ\_AJD  
\_A\_500,3JUQ\_AJD\_B\_500,3JUQ\_AKD\_B\_600,3JVS\_AGY\_A\_900,3JVW\_DMP\_A\_323,3JVY\_017\_B\_401,  
3JW2\_017\_A\_401,3JXU\_AD\_P\_A\_486,3K00\_MTT\_A\_405,3K02\_TXT\_A\_405,3K1J\_AD\_P\_B\_642,3K2P\_JTH  
\_B\_1001,3K4V\_ROC\_B\_201,3K4V\_ROC\_D\_201,3K54\_1N1\_A\_1,3K5I\_AIR\_A\_402,3K5I\_AIR\_C\_402,3K5  
I\_AIR\_D\_402,3K5K\_DXQ\_A\_2000,3K5K\_DXQ\_B\_2001,3K5V\_STI\_A\_2,3K5V\_STJ\_A\_1,3K7K\_KCS\_A\_  
301,3K87\_FAD\_B\_500,3K8O\_229\_E\_9006,3K8O\_229\_Q\_9002,3K8O\_229\_S\_9005,3K8O\_229\_T\_9004,3K8  
O\_229\_U\_9003,3K8O\_229\_Y\_9001,3K98\_1RC\_A\_901,3K98\_1RC\_B\_901,3KA2\_2NC\_A\_204,3KAF\_4D9\_  
A\_164,3KDC\_JZP\_A\_100,3KDD\_JZQ\_A\_100,3KDM\_TES\_H\_226,3KE1\_829\_A\_164,3KE1\_829\_B\_164,3K  
GT\_GEN\_A\_3071,3KGU\_GEN\_A\_3071,3KGU\_GEN\_B\_3071,3KJD\_78P\_A\_1,3KMR\_EQN\_A\_1,3KMX\_G  
00\_A\_501,3KMX\_G00\_B\_501,3KMY\_D8Y\_A\_501,3KMY\_D8Y\_B\_501,3KN0\_3TO\_A\_501,3KN0\_3TO\_B\_  
501,3KPU\_ES1\_A\_290,3KPU\_SAH\_A\_2001,3KPU\_SAH\_B\_2002,3KPV\_ADE\_A\_290,3KPV\_ADE\_B\_290,  
3KPV\_SAH\_A\_2001,3KPV\_SAH\_B\_2002,3KPW\_1SQ\_A\_290,3KPW\_SAH\_A\_2001,3KPW\_SAH\_B\_2002,  
3KQM\_ES3\_A\_290,3KQM\_ES3\_B\_290,3KQM\_SAH\_A\_2001,3KQM\_SAH\_B\_2002,3KQO\_ES4\_A\_290,3K  
QO\_ES4\_B\_290,3KQO\_SAH\_A\_2001,3KQO\_SAH\_B\_2002,3KQP\_ES5\_B\_290,3KQP\_SAH\_A\_2001,3KQR  
\_OPE\_A\_700,3KQR\_OPE\_C\_2700,3KQR\_OPE\_D\_3700,3KQR\_OPE\_E\_4700,3KQS\_AX7\_A\_290,3KQS\_A  
X7\_B\_290,3KQS\_SAH\_A\_2001,3KQT\_ES7\_A\_290,3KQT\_ES7\_B\_290,3KQT\_SAH\_A\_2001,3KQT\_SAH\_  
B\_2002,3KQW\_ES9\_A\_290,3KQW\_ES9\_B\_290,3KQW\_SAH\_A\_2001,3KQW\_SAH\_B\_2002,3KQY\_ES0\_  
A\_290,3KQY\_SAH\_A\_3001,3KQY\_SAH\_B\_3002,3KR1\_SAH\_A\_3001,3KR1\_SAH\_B\_3002,3KR1\_VGD\_  
A\_290,3KR1\_VGD\_B\_290,3KR2\_ET2\_A\_1001,3KR2\_ET2\_B\_1002,3KR2\_SAH\_A\_3001,3KR2\_SAH\_B\_30  
02,3KRK\_ACD\_A\_700,3KRK\_ACD\_B\_700,3KRQ\_3TR\_A\_607,3KRQ\_3TR\_B\_608,3KRY\_3KR\_A\_1800,3  
KRY\_3KR\_B\_2800,3KRY\_3KR\_C\_3800,3KV2\_NNH\_A\_901,3KV2\_NNH\_B\_902,3KV4\_OGA\_A\_5798,3K  
X3\_140\_A\_1470,3KX3\_140\_B\_1470,3KXO\_KXO\_A\_202,3KXO\_KXO\_B\_203,3KYQ\_DPV\_A\_201,3KZL\_  
ACO\_A\_266,3KZL\_ACO\_C\_266,3LIN\_PLM\_A\_161,3L59\_BDJ\_A\_1,3L5B\_BDO\_A\_1,3L5B\_BDO\_B\_455,  
3L5M\_COU\_A\_801,3L5M\_COU\_A\_802,3L66\_COU\_A\_803,3L68\_COU\_A\_801,3L68\_COU\_A\_803,3L6H\_  
BET\_A\_1,3L8S\_BFF\_A\_361,3L8X\_N4D\_A\_361,3LB1\_IOL\_A\_191,3LB1\_IOL\_B\_192,3LB2\_BML\_A\_191,  
3LB2\_BML\_B\_192,3LB3\_4CH\_B\_192,3LB4\_FPN\_A\_191,3LBD\_9CR\_A\_424,3LBZ\_Z89\_A\_201,3LCU\_SA  
H\_A\_6732,3LCV\_SAM\_B\_301,3LDP\_3P1\_A\_408,3LDP\_3P1\_B\_502,3LDQ\_3P1\_A\_401,3LE8\_2B5\_A\_301,  
3LE8\_2B5\_B\_301,3LEN\_ZST\_A\_600,3LEP\_388\_A\_600,3LF0\_ATP\_A\_701,3LF0\_ATP\_C\_701,

### Testing set

1A0T\_SUC\_R\_1,1AKQ\_FMN\_A\_149,1AKR\_FMN\_A\_149,1BM7\_FLF\_B\_502,1CIL\_ETS\_A\_263,1D7J\_BU  
Q\_A\_311,1DEH\_NAD\_B\_377,1E4H\_PBR\_B\_999,1EL7\_MTD\_B\_811,1EWJ\_BLM\_A\_1001,1FHW\_I5P\_A\_  
1001,1FTM\_AMQ\_B\_429,1FTM\_AMQ\_C\_427,1HK4\_T44\_A\_1008,1IND\_EOT\_H\_801,1J0X\_NAD\_P\_1336  
,1JMI\_UMP\_A\_317,1KE9\_LS5\_A\_299,1L5Q\_CFF\_B\_1864,1LBL\_137\_A\_300,1MAI\_I3P\_A\_200,1N8V\_BD  
D\_A\_501,1N8V\_BDD\_B\_512,1NJC\_DCM\_A\_317,1OBA\_CHT\_A\_1340,1OE7\_GSH\_A\_301,1OKL\_MNS\_A\_  
862,1OKO\_GAL\_C\_902,1OKO\_GLA\_B\_901,1OPB\_RET\_D\_134,1OW4\_2AN\_A\_1004,1P28\_HBR\_A\_100  
2,1POT\_SPD\_A\_350,1Q7A\_OPB\_A\_124,1R4W\_GSH\_A\_301,1R6N\_434\_A\_1112,1RBO\_CAP\_B\_476,1RB  
O\_CAP\_E\_476,1RE9\_DSO\_A\_601,1RL8\_RIT\_A\_9001,1RYH\_GNP\_B\_1538,1SDT\_MK1\_B\_902,1SWD\_BT  
N\_A\_300,1SWG\_BTN\_D\_900,1T64\_TSN\_B\_1386,1URG\_MAL\_A\_1403,1UV6\_CCE\_J\_1206,1UZV\_FUC\_  
C\_999,1UZV\_FUC\_D\_999,1VYR\_TNF\_A\_1402,1VZT\_UDP\_A\_1370,1VZT\_UDP\_B\_2370,1WOO\_DAN\_A\_  
1778,1W96\_S1A\_A\_1567,1XH6\_R94\_A\_351,1XOW\_R18\_A\_1001,1XW6\_GSH\_B\_751,1YA3\_STR\_B\_200  
1,1Z10\_COU\_A\_501,1ZDQ\_MSM\_C\_1509,1ZOA\_140\_B\_1471,2ANZ\_26D\_A\_500,2AQB\_TL6\_B\_601,2AR  
C\_ARA\_B\_171,2AY3\_MPP\_B\_414,2AZ5\_307\_C\_2,2B3F\_GAL\_A\_3310,2B3F\_GAL\_B\_3311,2BAJ\_1PP\_A\_  
401,2BAL\_PQA\_A\_401,2CAQ\_GSH\_A\_1208,2CB3\_MLD\_D\_1344,2CET\_PGI\_B\_1447,2CLL\_F9F\_A\_126  
8,2CVD\_HQL\_C\_2601,2D06\_EST\_A\_304,2D0K\_FOL\_A\_1161,2DU8\_BEZ\_B\_1352,2DU8\_FAD\_A\_351,2E  
5Y\_ATP\_A\_1001,2EUP\_LG4\_A\_400,2F7A\_BEZ\_B\_1002,2F8G\_017\_B\_401,2FQY\_ADN\_A\_400,2FR3\_RE  
A\_A\_300,2G78\_REA\_A\_200,2GJ5\_VD3\_A\_163,2GZ2\_A2P\_A\_502,2GZL\_2AA\_A\_901,2H2J\_SFG\_A\_800,  
2H90\_COU\_A\_801,2H90\_COU\_A\_802,2HF8\_GSP\_B\_300,2HJB\_PZM\_A\_1101,2HNX\_PLM\_A\_135,2HU6\_  
37A\_A\_400,2I13\_CAO\_E\_500,2IMD\_2C2\_A\_305,2J7D\_G11\_B\_1446,2JDP\_MFU\_B\_1115,2NMZ\_ROC\_B\_  
401,2NNP\_ROC\_A\_401,2NXG\_A5P\_A\_1269,2OOO\_XAP\_B\_601,2OTZ\_1MR\_X\_203,2OZL\_TPP\_A\_2330,  
2P4S\_DIH\_C\_402,2PDB\_ZST\_A\_600,2PDC\_393\_A\_600,2PGZ\_COC\_A\_401,2PZE\_ATP\_A\_1,2QHD\_DAO  
\_A\_501,2QM7\_GDP\_B\_602,2QPU\_QPU\_B\_4000,2QS1\_UB1\_B\_602,2QV7\_AD\_P\_A\_500,2QVU\_FDP\_B\_33

9,2QWL\_ADP\_A\_486,2QX4\_ML1\_B\_233,2R0H\_CTO\_B\_165,2RA6\_ETY\_D\_602,2RCB\_DSN\_B\_902,2RF  
Y\_CBI\_C\_431,2RIN\_ACH\_B\_1,2V5V\_FMN\_B\_170,2VW5\_BC6\_B\_500,2VWC\_BC2\_A\_1215,2VYT\_MLZ  
\_A\_1244,2W87\_GCU\_B\_1148,2W95\_NGA\_B\_254,2W97\_MGO\_A\_1218,2WCV\_FUC\_C\_1141,2WDS\_CO  
A\_A\_1124,2WVGJ\_VGH\_A\_2346,2WNJ\_ZY7\_E\_301,2WSV\_LBT\_A\_1688,2WTV\_ZZL\_C\_1392,2WUZ\_TP  
F\_B\_1460,2WVT\_FHN\_B\_1474,2XIB\_DFU\_B\_1472,2XJ1\_XJ1\_A\_1307,2Y1F\_34F\_A\_1390,2YIM\_MC4\_C  
\_1363,2YMD\_SRO\_J\_1213,2YME\_CWB\_G\_1207,2YME\_CWB\_I\_1207,2ZN7\_410\_A\_300,3A6R\_FMN\_A\_  
123,3ADS\_IMN\_A\_1,3AKM\_11D\_D\_132,3AP6\_LAT\_D\_155,3AYE\_LAT\_B\_0,3B99\_U51\_B\_702,3BEX\_P  
AU\_F\_248,3BF1\_PAU\_A\_248,3BF1\_PAU\_D\_248,3BPC\_KDA\_B\_212,3BYM\_AM0\_A\_1,3C2O\_NTM\_A\_3  
00,3C39\_3PG\_A\_417,3C8E\_GSH\_B\_289,3CFT\_5NS\_B\_128,3CR4\_PNT\_X\_101,3CYU\_1CR\_A\_264,3D1X\_  
ROC\_A\_201,3D2E\_ATP\_A\_1001,3DLA\_NXX\_D\_680,3E6K\_ABH\_B\_555,3E6V\_ABH\_B\_555,3EKQ\_ROC  
\_A\_100,3ERN\_CAR\_A\_900,3EUF\_BAU\_D\_400,3F19\_HS6\_A\_0,3F39\_IPH\_A\_2001,3F8C\_HT1\_A\_127,3F  
AT\_AMQ\_B\_428,3FK0\_S3P\_A\_428,3FLN\_3FN\_C\_361,3FZH\_3BH\_A\_401,3FZK\_3BK\_A\_401,3GA5\_RGG  
\_B\_401,3GW9\_VNI\_B\_490,3H26\_B56\_A\_901,3HAD\_NAD\_A\_350,3HDY\_GDU\_G\_500,3HRF\_P47\_A\_137  
4,3HS5\_ACD\_B\_1,3HSC\_ADP\_A\_486,3HV7\_1AU\_A\_361,3JUO\_AJD\_B\_500,3JUQ\_AKD\_A\_600,3JYR\_A  
CR\_A\_371,3K41\_M6D\_A\_500,3K41\_M6D\_B\_501,3K5V\_STJ\_B\_1,3KCE\_4BY\_A\_165,3KGT\_GEN\_B\_307  
1,3KQP\_ES5\_A\_290,3KQR\_OPE\_B\_1700,3KQS\_SAH\_B\_2002,3KR8\_XAV\_A\_1163,3KXZ\_925\_A\_1,3KZ  
L\_ACO\_D\_266,3LB3\_4CH\_A\_191,3LBZ\_Z89\_A\_202,3LF0\_ATP\_B\_701,3LFE\_Z84\_A\_361,3LKA\_M4S\_A  
\_1,3LZS\_017\_A\_200,3LZZ\_GDP\_A\_173,3M6P\_BB2\_B\_194,3M6R\_BB2\_B\_194,3M6R\_BB2\_D\_194,3M89\_  
GSP\_A\_408,3MBM\_717\_B\_165,3MF5\_HJZ\_A\_571,3MHM\_J75\_A\_264,3MO5\_E72\_B\_2,3MS9\_MS9\_A\_51  
6,3MS9\_MS9\_B\_516,3MXF\_JQ1\_A\_1,3N5K\_TG1\_A\_1000,3N7A\_FA1\_U\_148,3N7A\_FA1\_W\_147,3N8K\_  
D1X\_C\_147,3N8K\_D1X\_L\_147,3NEE\_B72\_B\_1,3NX7\_NHK\_A\_0,3O84\_HTJ\_A\_995,3OF2\_NAD\_A\_4345,  
3OLT\_ACD\_A\_620,3OO6\_GAL\_B\_405,3OXV\_478\_A\_200,3OZJ\_BGV\_A\_1,3P3C\_3P3\_A\_501,3PD2\_A3S  
\_B\_501,3Q8H\_AO9\_A\_165,3QND\_SIA\_A\_1,3QUG\_GIX\_B\_700,3QYY\_C2E\_B\_486,3R5W\_F42\_C\_201,3R  
5W\_F42\_O\_201,3RHQ\_NAP\_B\_903,3RS8\_APR\_A\_495,3RYV\_RYV\_B\_1,3SAX\_E50\_A\_263,3SFG\_2TU\_  
A\_601,3SHZ\_5CO\_A\_1,3TI1\_B49\_A\_299,3TIF\_ADP\_B\_1,3TNZ\_IYR\_B\_302,3UFV\_HW9\_B\_800,3UG2\_I  
RE\_A\_1,3ULK\_NDP\_A\_492,3VJC\_ZGA\_E\_400,3VJC\_ZGA\_F\_400,3WQM\_B29\_A\_402,3WTL\_N1Y\_C\_30  
1,3WTN\_N2Y\_I\_301,3WTO\_N2Y\_D\_301,3WYQ\_BTN\_A\_1001,3WZQ\_ZOF\_D\_1001,3ZHX\_FM6\_A\_501,  
3ZHY\_FM6\_B\_501,3ZYF\_147\_A\_1001,3ZYU\_1GH\_B\_1171,4A22\_TD4\_B\_1344,4A4V\_YFD\_B\_999,4AD6  
\_GSY\_A\_1159,4AGQ\_P96\_B\_1290,4AHS\_AKH\_B\_1218,4A15\_ADK\_D\_400,4AJH\_88S\_A\_1334,4AJL\_88  
W\_A\_1333,4AL4\_W7E\_B\_1332,4AQH\_TB7\_A\_1380,4AVK\_FVQ\_B\_201,4AYR\_IFL\_A\_504,4B0J\_3MQ\_  
C\_1172,4B0J\_3MQ\_F\_1172,4B0J\_3MQ\_G\_1172,4B0J\_3MQ\_P\_1172,4B2I\_LZ1\_A\_1351,4B74\_1LH\_A\_172  
1,4BHI\_RUJ\_A\_401,4C4S\_GRX\_A\_1219,4C6X\_TLM\_A\_1419,4CGJ\_NZL\_A\_1216,4CO3\_ATP\_A\_113,4C  
P5\_EOI\_D\_1156,4CS0\_ACO\_B\_1128,4CWW\_HW9\_A\_800,4CWW\_HW9\_B\_800,4D1J\_DGJ\_F\_600,4DAI\_  
0J5\_A\_301,4DCU\_GDP\_A\_501,4DET\_KMP\_A\_201,4DQE\_017\_B\_101,4DUE\_SRO\_A\_501,4DUH\_RLI\_B\_  
301,4DY6\_A22\_A\_301,4EJD\_1F1\_A\_102,4EJG\_NCT\_B\_501,4EJJ\_NCT\_D\_501,4EK8\_16K\_A\_301,4EO3\_F  
MN\_A\_401,4FAK\_SAM\_A\_201,4FCQ\_2N6\_A\_301,4FE9\_MTT\_A\_508,4FKP\_LS5\_A\_301,4FKW\_62K\_A\_  
301,4FL2\_ANP\_A\_702,4FVQ\_ATP\_A\_901,4FZJ\_0W1\_B\_402,4GV8\_DUP\_F\_201,4H7Q\_COI\_A\_402,4HB  
M\_0Y7\_B\_201,4HMQ\_FCE\_B\_401,4I8X\_6P3\_B\_401,4I9H\_1E4\_B\_401,4I9N\_1E6\_G\_401,4IBD\_1DL\_A\_4  
01,4IGT\_3ZA\_A\_801,4IPJ\_LMR\_A\_402,4IQ9\_1GB\_A\_410,4IRX\_INS\_A\_401,4J0M\_BLD\_A\_804,4J0R\_1H  
2\_A\_205,4J93\_1JR\_A\_202,4JDF\_SPD\_A\_401,4JZB\_P2H\_A\_405,4K7N\_MCT\_C\_201,4KM0\_CP6\_B\_201,4  
KMZ\_FOL\_A\_301,4KN0\_MTX\_A\_301,4KOX\_CLS\_A\_205,4KP8\_E1G\_B\_302,4KUB\_COA\_A\_201,4L06\_  
NAP\_A\_502,4L06\_NAP\_F\_502,4L4V\_1VY\_C\_301,4LAR\_1WE\_L\_300,4LOL\_1YE\_A\_401,4LOL\_1YE\_A\_  
402,4LOV\_KGM\_A\_201,4LPH\_YL3\_F\_402,4LUO\_1DZ\_A\_202,4LY1\_20Y\_A\_407,4LZS\_L46\_A\_201,4M0  
Z\_M0Z\_A\_701,4M2R\_BZ1\_A\_302,4MJO\_2C1\_H\_401,4MMM\_BP7\_A\_201,4N5D\_2FQ\_A\_401,4N6H\_EJ4  
A\_1219,4N9I\_PCG\_C\_301,4NKW\_PLO\_B\_601,4NO4\_LAT\_C\_203,4NXU\_ADP\_D\_501,4OAS\_2SW\_A\_20  
1,4OCC\_2TZ\_A\_201,4OGJ\_2TA\_B\_202,4OMK\_SQL\_A\_305,4PD6\_URI\_A\_501,4PIN\_AVI\_B\_401,4Q1X\_0  
17\_A\_101,4Q3U\_NNH\_C\_405,4Q4P\_2YO\_A\_405,4Q4Q\_SAQ\_A\_406,4QAC\_KK3\_I\_304,4QIJ\_1HA\_I\_401  
4,4QJW\_WWO\_D\_302,4QYA\_LU2\_B\_201,4R06\_3E7\_A\_501,4R57\_ACO\_F\_201,4RPN\_PCI\_A\_402,4RPO\_  
T6C\_C\_401,4RT0\_C2E\_A\_201,4TQ3\_GPP\_D\_401,4TQK\_NAG\_B\_502,4U54\_3C5\_A\_501,4UGB\_QJ7\_A\_9  
04,4UGK\_7S9\_A\_904,4UGL\_S90\_A\_904,4UGO\_1QF\_A\_904,4UGY\_EXI\_A\_904,4UHI\_VFV\_B\_600,4UHL  
\_VFV\_F\_600,4URZ\_VJP\_R\_1167,4UYG\_73B\_F\_1456,4W9D\_3JK\_L\_301,4W9H\_3JF\_F\_301,4W9K\_3JO\_I  
\_301,4WET\_WEF\_A\_201,4WF4\_WF4\_B\_201,4WW8\_VD9\_D\_304,4WYC\_3VS\_A\_502,4X1G\_3WG\_A\_50  
2,4X3T\_45E\_F\_101,4X5R\_3XO\_A\_301,4XJ2\_FMN\_A\_501,4XO8\_KGM\_B\_501,4XOE\_KGM\_A\_301,4XT  
W\_44M\_B\_300,4XU0\_44N\_B\_301,4XZJ\_NAD\_A\_700,4YEE\_4CQ\_G\_201,4YM3\_LAT\_A\_401,4ZEI\_LAO  
\_A\_601,4ZGK\_4NX\_B\_201,4ZHG\_4OL\_F\_202,5A7B\_KMN\_A\_1001,5AB7\_MLC\_D\_1411,5ABP\_GLA\_A\_  
307,5ADV\_EHS\_B\_1313,5AQY\_ADN\_A\_1389,5B25\_4QJ\_A\_603,5B2D\_SLT\_A\_606,5B5F\_6F3\_B\_200,5B  
PL\_ADP\_A\_401,5BT4\_2LO\_A\_201,5BT4\_2LO\_B\_201,5BVB\_DOG\_A\_201,5BVB\_DOG\_B\_201,5C3Q\_AK  
G\_D\_402,5C3Q\_TDR\_D\_403,5C3S\_FYU\_A\_403,5CHR\_4NC\_A\_204,5D3X\_4IP\_B\_501,5D75\_FK5\_A\_301,  
5DW1\_5GD\_A\_500,5E58\_CPZ\_A\_503,5E58\_CPZ\_B\_503,5E58\_CPZ\_E\_502,5E70\_RCD\_D\_801,5EFA\_MG  
T\_A\_501,5EOU\_ATP\_B\_401,5ETK\_5RU\_A\_202,5F60\_5VZ\_A\_201,5F62\_5W1\_A\_201,5F8Y\_X6X\_A\_201,

5FB7\_ACD\_D\_302,5FE9\_5WS\_A\_901,5FLO\_J4K\_A\_1263,5FNJ\_YI6\_A\_1267,5FOG\_VRT\_C\_1542,5GIN\_PAL\_E\_3226,5G61\_FNY\_A\_544,5GLZ\_BGC\_C\_800,5GWE\_GWM\_D\_502,5H1T\_7FF\_C\_1103,5H2U\_1N1\_D\_504,5H9R\_TGZ\_A\_301,5H9S\_TGZ\_B\_201,5I3B\_HQE\_B\_303,5I3W\_68L\_A\_406,5I6D\_AU6\_B\_402,5I7A\_68Q\_C\_401,5I9X\_DB8\_A\_1001,5IA2\_L66\_A\_1001,5IA5\_GV0\_A\_1001,5IN4\_6CK\_D\_401,5IVC\_6E7\_A\_601,5IVJ\_6ED\_A\_601,5J5F\_6GH\_J\_302,5J5G\_6GF\_E\_303,5J5G\_6GF\_I\_302,5JAI\_NAI\_A\_401,5JH7\_6K9\_B\_503,5JSJ\_6PD\_A\_301,5K2B\_ZMA\_A\_1201,5KAU\_RHQ\_A\_201,5KGS\_6SR\_A\_502,5KQX\_ROC\_A\_101,5KVA\_SAM\_A\_301,5L3U\_6NG\_E\_409,5L9G\_MO0\_A\_401,5LJD\_RTL\_A\_201,5M7U\_XHA\_A\_1001,5MAM\_SRO\_Q\_101,5MB4\_NAG\_A\_508,5MEH\_DMJ\_A\_506,5MF6\_7M2\_B\_408,5NF7\_8VZ\_A\_301,5NK3\_92Q\_A\_1001,5NK4\_90E\_A\_1001,5NK8\_90Z\_A\_1001,5NW1\_9BH\_F\_301,5NW2\_9B8\_F\_301,5OFW\_9TW\_A\_401,5TCO\_79Q\_A\_401,5TF9\_7AV\_B\_501,5TRF\_7HC\_E\_201,5U8V\_FAD\_D\_501,5VJG\_0BP\_A\_403,5VSD\_9HJ\_A\_3006,5X67\_UMP\_B\_401,5XKR\_BZE\_C\_202,8ABP\_GAL\_A\_308,8ABP\_GLA\_A\_307

### Validation set

186L\_N4B\_A\_400,188L\_OXE\_A\_400,1A0T\_SUC\_Q\_1,1A99\_PUT\_A\_371,1ADO\_13P\_B\_1053,1B55\_4IP\_B\_172,1BCJ\_NGA\_3\_1,1BUP\_ADP\_A\_486,1BWN\_4IP\_B\_172,1BZY\_IMU\_A\_300,1CT8\_TAA\_B\_550,1D2E\_GDP\_D\_1304,1D2V\_BR\_A\_843,1D6V\_HOP\_H\_401,1DIH\_NDP\_A\_301,1DJX\_I3P\_B\_1,1DRH\_NAP\_A\_164,1DZK\_PRZ\_B\_700,1E3V\_DXC\_B\_801,1E8G\_FAD\_A\_600,1EL5\_DMG\_A\_801,1EL5\_DMG\_B\_811,1EWJ\_BLM\_B\_1002,1EWJ\_BLM\_G\_2004,1EYN\_2AN\_A\_550,1F4X\_MGS\_H\_301,1FL3\_SPB\_A\_226,1G4J\_FB\_A\_666,1G7V\_PAI\_A\_300,1GAF\_NPE\_H\_218,1GGD\_FAF\_C\_301,1GNI\_OLA\_A\_1004,1GPY\_G6P\_A\_998,1GT3\_3OM\_B\_1158,1GT4\_UNA\_B\_1158,1GT5\_BZQ\_B\_1158,1GWV\_LAT\_B\_1371,1H46\_RNP\_X\_1433,1H6H\_PIB\_A\_150,1H9Z\_RWF\_A\_3001,1HN4\_MJI\_A\_397,1HQ5\_S2C\_A\_551,1I7Z\_COC\_A\_301,1IF4\_FBS\_A\_555,1IXI\_2HP\_A\_322,1J00\_AZM\_A\_1400,1JIF\_BLM\_B\_402,1JPZ\_140\_B\_2470,1JQV\_ORO\_A\_1313,1JR0\_A24\_D\_104,1JR0\_A24\_F\_104,1JR0\_A24\_G\_104,1K6T\_XN1\_B\_509,1KMY\_BPY\_A\_300,1KNU\_YPA\_A\_1001,1L7X\_700\_A\_862,1LAH\_ORN\_E\_240,1LHV\_NOG\_A\_301,1LKE\_DOG\_A\_500,1LRH\_NLA\_A\_5190,1LRH\_NLA\_B\_6190,1LRH\_NLA\_D\_8190,1LUQ\_BTN\_A\_5100,1LV8\_9PP\_B\_3002,1LV8\_9PP\_C\_3003,1M5W\_DXP\_C\_1003,1M8D\_CLW\_A\_906,1M9J\_CLW\_B\_907,1M9K\_7NI\_B\_907,1MI4\_S3P\_A\_1001,1MJJ\_HAL\_H\_1002,1MPW\_TMH\_A\_1450,1MRW\_K57\_A\_1001,1MRX\_K57\_B\_1001,1MSN\_JE2\_B\_1001,1N0S\_FLU\_B\_501,1N43\_BTN\_A\_5100,1N8U\_BDD\_A\_413,1NF3\_GNP\_B\_202,1NFS\_DED\_A\_301,1NG\_B\_ADP\_A\_486,1NJJ\_ORX\_B\_603,1NKI\_PPF\_A\_5001,1O7O\_UDP\_B\_2371,1O7Q\_UDP\_A\_1375,1OAR\_A\_ZN\_H\_500,1OBO\_FMN\_B\_2170,1ODI\_ADN\_B\_1237,1ODJ\_GMP\_C\_1237,1OFZ\_FUL\_A\_1314,1OFZ\_FUL\_A\_1315,1OIF\_IFM\_A\_1447,1ORK\_ATC\_A\_222,1OWB\_NAD\_A\_3000,1P19\_IMP\_C\_3300,1P28\_HBR\_B\_1004,1P28\_HBS\_A\_1001,1PK8\_ATP\_H\_807,1POY\_SPD\_4\_400,1PX2\_ATP\_B\_800,1PY5\_PY1\_A\_700,1PZI\_1DM\_E\_105,1QKT\_EST\_A\_600,1QYG\_BCG\_H\_401,1R0X\_ATP\_D\_4,1R4W\_GSH\_C\_801,1RBP\_RTL\_A\_183,1RNT\_2GP\_A\_105,1RZ0\_FAD\_G\_7200,1RZ1\_FAD\_A\_1200,1RZ1\_FAD\_B\_2200,1S5Z\_SON\_A\_1160,1SBR\_VIB\_A\_502,1SQN\_NDR\_B\_2001,1SW1\_PBE\_B\_302,1SWE\_BTN\_B\_400,1SWE\_BTN\_C\_500,1SWG\_BTN\_B\_700,1SWK\_BTN\_B\_5200,1SWK\_BTQ\_C\_5300,1SWN\_BTN\_C\_500,1SWP\_BTN\_B\_400,1SWR\_BTN\_A\_300,1SZ0\_M6P\_A\_500,1T64\_TSN\_A\_387,1TI7\_NAP\_A\_400,1TJP\_HPF\_A\_1001,1TLC\_DGP\_A\_265,1TOX\_NAD\_B\_536,1TQ4\_GDP\_A\_500,1TTM\_667\_A\_264,1U27\_4IP\_A\_101,1U72\_MTX\_A\_188,1U\_GW\_GAL\_E\_2200,1UGW\_GAL\_G\_3200,1UTM\_PEA\_A\_246,1UV6\_CCE\_C\_1206,1UZV\_FUC\_A\_999,1V\_KJ\_A3P\_A\_602,1VKJ\_A3P\_A\_603,1VYP\_TNF\_X\_500,1W3J\_OXZ\_B\_1445,1WBJ\_G3P\_A\_1268,1WCB\_P\_E1\_A\_1215,1WDQ\_MAL\_A\_496,1WPG\_TG1\_D\_1303,1WS4\_GYP\_C\_502,1X7Y\_TDP\_A\_901,1XAP\_TTB\_A\_1,1XBB\_STI\_A\_1,1XH7\_R96\_A\_351,1XH9\_R69\_A\_351,1Y0L\_HAN\_H\_501,1YC3\_4BC\_A\_237,1YDA\_AZM\_A\_264,1YKL\_DHB\_B\_550,1YKP\_DHB\_A\_550,1YKP\_DHB\_F\_2550,1Z10\_COU\_C\_501,1Z3T\_CBI\_A\_500,1Z95\_198\_A\_501,1ZDQ\_MSM\_A\_1507,1ZZ1\_SHH\_B\_2552,2A06\_SMA\_C\_2001,2A2I\_A5P\_B\_2269,2A4L\_RRC\_A\_300,2AA5\_STR\_B\_302,2AAC\_FCB\_A\_1,2AMT\_1AA\_D\_6901,2AY2\_CXP\_B\_414,2BGD\_T1D\_A\_1298,2BMK\_PDD\_B\_1217,2BMZ\_XLM\_A\_1143,2BOJ\_ARW\_B\_1115,2BYR\_MLK\_G\_301,2BYR\_MLK\_J\_301,2BYS\_LOB\_E\_301,2BYS\_LOB\_F\_301,2BYS\_LOB\_J\_301,2C4V\_CIT\_A\_1159,2C7G\_ODP\_A\_502,2C92\_TP6\_E\_701,2C94\_TSF\_A\_701,2C94\_TSF\_E\_701,2C97\_JCL\_A\_701,2CB8\_MYA\_B\_1088,2CBO\_TH2\_A\_121,2CIS\_TA6\_A\_1290,2CLM\_F6F\_A\_1268,2D4N\_DUP\_A\_777,2DKN\_NAI\_A\_4000,2E7F\_C2F\_A\_3000,2EUN\_LG3\_A\_296,2F78\_BEZ\_B\_1004,2F8I\_205\_A\_1002,2FAV\_APR\_B\_477,2FLH\_ZEA\_C\_705,2FLH\_ZEA\_D\_707,2FLR\_7NH\_H\_258,2FOV\_B30\_A\_303,2FOY\_B30\_B\_316,2FVD\_LIA\_A\_299,2FW6\_CIT\_B\_1002,2FWP\_ICR\_A\_1001,2FXE\_DR7\_A\_102,2FXV\_5GP\_B\_201,2GCE\_SFC\_D\_1754,2GFD\_RDA\_A\_1001,2GYU\_HI6\_B\_602,2GYW\_OBI\_B\_953,2GZ1\_NAP\_B\_701,2H8Z\_8CM\_A\_803,2HA3\_CHT\_A\_952,2HA6\_SCK\_A\_901,2HDK\_COI\_B\_900,2HF9\_GSP\_B\_300,2HMU\_ATP\_A\_601,2HR6\_DUD\_A\_777,2HS2\_017\_B\_203,2HZI\_JIN\_A\_600,2HZL\_PYR\_B\_603,2I6B\_89I\_B\_500,2IJ7\_TPF\_F\_2474,2IME\_2C2\_A\_305,2IW4\_2PN\_A\_1315,2IZH\_BTN\_B\_300,2IZJ\_BTN\_A\_300,2J4K\_U5P\_E\_227,2J7B\_NTZ\_A\_1446,2J7D\_GI1\_A\_1446,2J7G\_GI4\_B\_1446,2J9L\_ATP\_B\_1754,2J9L\_ATP\_E\_1752,2JDP\_MFU\_D\_1115,2JDY\_MMA\_D\_1115,2JFZ\_003\_A\_1256,2JFZ\_DGL\_A\_1257,2JJ3\_JJ3\_A\_1499,2NN1\_M28\_A\_311,2NNV\_M29\_A\_301,2NSJ\_C2R\_A\_242,2NX3\_A5P\_I\_269,2O4N\_TPV\_A\_300,2O4R\_VD5\_A\_500,2OU0\_MR3\_X\_303,2P15\_EZT

\_A\_600,2PD9\_FID\_A\_600,2PDG\_47D\_A\_600,2PDI\_ZST\_A\_600,2PFY\_PCA\_D\_302,2PQB\_GG9\_A\_501,2P  
QC\_RC1\_A\_601,2PZV\_IPH\_B\_402,2Q89\_6CS\_A\_501,2QM9\_TDZ\_B\_202,2QPU\_QPU\_A\_4000,2QRY\_TP  
S\_D\_400,2QS4\_LY5\_A\_260,2QS4\_LY5\_B\_259,2QS4\_LY5\_D\_260,2QWN\_AD\_P\_A\_487,2QX0\_PH2\_A\_181  
,2QX0\_PH2\_B\_182,2QX6\_ML1\_B\_233,2R1W\_KDB\_A\_217,2R1Y\_KDR\_B\_213,2RDE\_C2E\_B\_301,2RFY\_  
CBI\_D\_431,2RTD\_BTN\_D\_300,2RTE\_BTN\_D\_301,2UZJ\_E64\_A\_1254,2UZW\_SS4\_E\_1351,2V57\_PRL\_C  
\_1187,2V8W\_MGO\_E\_1218,2VKU\_DBE\_A\_1448,2VO4\_4NM\_B\_1221,2VPO\_6CS\_B\_1312,2VRJ\_NCW\_  
B\_1446,2VYT\_MLZ\_B\_1244,2W09\_CM9\_A\_1451,2W92\_NGT\_A\_1809,2W9G\_TOP\_A\_1159,2W9S\_NDP\_  
A\_1159,2W9S\_TOP\_A\_1160,2W9S\_TOP\_C\_1160,2WBD\_RO5\_A\_1337,2WC4\_AMF\_B\_1446,2WC4\_AMF\_  
\_D\_1446,2WCV\_FUC\_A\_1141,2WCV\_FUC\_H\_1141,2WEO\_FBW\_A\_1263,2WGG\_TLM\_B\_1419,2WGG\_  
TLM\_D\_1417,2WH8\_II2\_B\_460,2WH8\_II2\_C\_460,2WI9\_1D2\_B\_1409,2WN9\_ZY5\_A\_301,2WNC\_TKT\_B  
\_300,2WPU\_KYT\_A\_400,2WQ4\_SFU\_A\_200,2WTV\_ZZL\_D\_1390,2WVA\_TPU\_X\_600,2WVT\_FHN\_A\_1  
473,2X00\_GYN\_C\_301,2X00\_GYN\_D\_301,2X5W\_K2B\_A\_1429,2XCG\_XCG\_A\_602,2XI7\_XI7\_C\_1186,2  
XI7\_XI7\_D\_1186,2XJJ\_L81\_A\_1225,2XP7\_4F8\_A\_1164,2XZW\_AKG\_C\_201,2Y34\_UN9\_A\_602,2Y7P\_SA  
L\_A\_1001,2YAZ\_UMP\_B\_1265,2YDW\_WSH\_A\_1183,2YEK\_EAM\_C\_1183,2YFA\_LMR\_A\_501,2YFE\_Y  
FE\_B\_999,2Y10\_Y10\_A\_1225,2YKI\_YKI\_A\_1224,2YMD\_SRO\_E\_1213,2YMD\_SRO\_H\_1206,2ZDL\_45U\_  
A\_501,2ZFS\_12U\_A\_501,2ZIF\_SAM\_A\_298,2ZKJ\_AD\_P\_A\_501,2ZM3\_575\_B\_1,2ZM3\_575\_D\_1,2ZYM\_A  
CX\_A\_901,3A1C\_ACP\_A\_997,3A1D\_AD\_P\_B\_997,3A5Y\_KAA\_C\_1992,3A5Y\_KAA\_D\_1993,3A6R\_FM\_N  
\_C\_123,3A73\_PJ2\_A\_1011,3AD7\_MTG\_B\_801,3ADS\_IMN\_A\_2,3AJ6\_NGA\_B\_2000,3AKM\_11D\_A\_132,  
3ALT\_MLB\_C\_301,3AO5\_BBY\_B\_1,3AP4\_LBT\_D\_155,3AR4\_TG1\_A\_1003,3ARV\_SAU\_A\_606,3ARW\_  
CTI\_A\_606,3B24\_B2J\_B\_2,3B26\_B2L\_A\_1,3B28\_B2X\_B\_2,3B4Y\_FLC\_A\_337,3B6H\_MXD\_B\_551,3B8H\_  
\_NAD\_F\_702,3BBF\_GDP\_A\_160,3BPX\_SAL\_B\_258,3BWJ\_ARX\_A\_351,3BXE\_13P\_A\_401,3C2F\_PR\_P\_A  
\_300,3C2V\_PHT\_A\_301,3C39\_3PG\_B\_417,3C79\_IM4\_A\_301,3C79\_IM4\_D\_304,3CAQ\_NDP\_A\_327,3CB0  
\_FMN\_B\_300,3CCT\_3HI\_D\_3,3CCW\_4HI\_C\_4,3CD5\_7HI\_A\_2,3CD7\_882\_A\_1,3CFT\_5NS\_B\_1,3COW\_5  
2H\_A\_401,3CR5\_PNT\_X\_95,3CS9\_NIL\_D\_600,3CYZ\_9OD\_B\_122,3D20\_017\_A\_201,3DKJ\_PR\_P\_B\_501,3  
DSU\_FPP\_B\_334,3DSZ\_LIZ\_B\_187,3E6K\_ABH\_A\_552,3EEB\_IHP\_B\_210,3EFS\_ATP\_B\_1001,3EFS\_BTN  
\_A\_2001,3EKP\_478\_B\_200,3EKS\_CY9\_A\_903,3EL1\_DR7\_A\_100,3EW2\_BTN\_B\_500,3EW2\_BTN\_E\_800,  
3EXE\_TPP\_A\_1005,3EXE\_TPP\_C\_1002,3F3U\_1AW\_B\_1,3FH7\_25P\_A\_612,3FQL\_79Z\_A\_571,3FUC\_9D9  
\_A\_301,3FUC\_9D9\_C\_301,3FZM\_3GO\_A\_401,3FZN\_D7K\_A\_601,3FZN\_D7K\_D\_603,3G3E\_G3E\_A\_353,  
3GCQ\_1BU\_A\_401,3GCU\_R48\_A\_401,3GF4\_UPG\_A\_392,3GFD\_IYR\_A\_302,3GI3\_B10\_A\_391,3GR6\_TC  
L\_J\_258,3GUS\_N11\_A\_211,3GUZ\_PAF\_A\_177,3GW9\_VNI\_D\_490,3GZ8\_APR\_D\_302,3HAD\_NAD\_B\_75  
0,3HCM\_S45\_B\_94,3HDQ\_GDU\_E\_500,3HJO\_EAA\_B\_211,3HKY\_IX6\_A\_579,3HMP\_CX4\_A\_1,3HP8\_S  
UC\_B\_108,3HQU\_UN9\_A\_500,3HT7\_JZ1\_A\_167,3HU3\_AGS\_A\_800,3HUB\_469\_A\_361,3HUC\_G97\_A\_3  
62,3HWW\_AKG\_D\_557,3I7S\_PYR\_A\_298,3IAI\_AZM\_A\_263,3IES\_M24\_A\_552,3ILQ\_1O2\_C\_286,3IMG\_  
BZ3\_B\_402,3ISJ\_A8D\_A\_308,3IUB\_FG2\_A\_302,3IVC\_FG4\_A\_302,3JRS\_A8S\_C\_3,3JUK\_UPG\_B\_282,3J  
UK\_UPG\_D\_284,3JZJ\_ACR\_A\_405,3K1J\_AD\_P\_A\_642,3K2P\_JTH\_A\_1001,3K5I\_AIR\_B\_402,3K5V\_STI\_  
B\_2,3K87\_FAD\_A\_600,3K8Q\_22A\_A\_290,3KDB\_006\_B\_100,3KDM\_TES\_B\_226,3KE1\_829\_C\_164,3KJD  
\_78P\_B\_1,3KPU\_ES1\_B\_290,3KPW\_1SQ\_B\_290,3KQP\_SAH\_B\_2002,3KQY\_ESO\_B\_290,3KR8\_XAV\_C\_  
1163,3KRY\_3KR\_D\_4800,3KZL\_ACO\_B\_266,3L66\_COU\_A\_801,3L66\_COU\_A\_802,3L68\_COU\_A\_802,3  
LB4\_FPN\_B\_192,3LBO\_LDT\_A\_600,3LBZ\_Z89\_B\_203,3LD5\_LDT\_A\_600,3LFF\_Z83\_A\_362,3LGS\_ADE  
\_D\_269,3LK0\_Z80\_D\_92,3LM1\_LEC\_G\_134,3LM1\_LEC\_K\_134,3LUD\_AMP\_A\_600,3LUJ\_U5P\_A\_1,3LU  
J\_U5P\_C\_1,3LZ5\_LDT\_A\_600,3M3R\_BCD\_G\_664,3M4H\_388\_A\_600,3M6R\_BB2\_C\_194,3MAG\_3MA\_A  
\_600,3MDT\_VOR\_A\_506,3MG5\_BTN\_B\_5200,3MHL\_J71\_A\_265,3MIY\_B49\_A\_1,3MIY\_B49\_B\_2,3MO5  
\_E72\_C\_1236,3MWL\_8OX\_B\_209,3N75\_G4P\_E\_716,3N7A\_FA1\_H\_148,3N7A\_FA1\_K\_147,3N7A\_FA1\_S  
\_147,3N7S\_3N6\_A\_1,3N8K\_D1X\_P\_147,3N8K\_D1X\_U\_147,3NCR\_AD\_P\_A\_120,3NDT\_ROC\_A\_101,3NH  
T\_U46\_A\_1,3NJQ\_NJQ\_B\_199,3NM6\_TRS\_B\_232,3NQ9\_OCA\_A\_1111,3O75\_FIX\_A\_1,3O75\_FIX\_B\_1,  
3O8T\_BMU\_A\_361,3OZC\_4CT\_A\_284,3P2V\_DOY\_A\_700,3P5O\_EAM\_A\_1,3PD3\_A3T\_A\_148,3PMA\_S  
CR\_D\_248,3PXF\_2AN\_A\_305,3PXZ\_2AN\_A\_300,3PYY\_STI\_A\_3,3Q7Q\_GNP\_B\_1,3Q9U\_COA\_B\_1070,  
3QO3\_ATP\_B\_66,3QPS\_CHD\_A\_211,3QRJ\_919\_A\_2,3QT7\_FM0\_B\_328,3QXV\_MTX\_A\_2000,3R52\_GY  
P\_B\_200,3R5R\_F42\_C\_1,3R5R\_F42\_D\_1,3R9C\_ECL\_A\_452,3RBU\_G88\_A\_1800,3RE4\_TO1\_A\_259,3RH  
Q\_NAP\_D\_903,3RJ9\_NAD\_C\_850,3RJ9\_NAD\_F\_850,3RM4\_3RM\_B\_1,3RU1\_3RU\_A\_398,3RW9\_DSH\_A  
\_303,3RY2\_BTN\_B\_5001,3RZ1\_RZ1\_B\_1,3S0D\_CTV\_A\_120,3S71\_EVD\_B\_263,3S9T\_E49\_A\_266,3SJT\_5  
AB\_A\_551,3SMR\_NP7\_C\_1000,3SW4\_18K\_A\_299,3T2C\_13P\_A\_411,3T2T\_MQT\_A\_135,3TKG\_ROC\_B\_  
801,3U10\_CMP\_A\_701,3U15\_03M\_B\_1,3U5J\_08H\_A\_1,3U9N\_09H\_A\_301,3U9W\_28P\_A\_7001,3UD5\_J1  
A\_A\_171,3UDH\_091\_A\_501,3UEW\_PLM\_A\_1000,3UEX\_STE\_A\_163,3UFV\_HW9\_A\_800,3UH4\_XAV\_A  
\_1,3UJB\_SAH\_A\_502,3UJB\_SAH\_B\_502,3UQ8\_NAD\_A\_1,3UUG\_BDP\_B\_331,3UVQ\_FS8\_A\_361,3V2J\_  
AZM\_A\_302,3VVH\_4BM\_A\_703,3VWS\_VWS\_A\_1003,3W9R\_A8S\_A\_201,3WTL\_N1Y\_D\_301,3WTN\_N  
2Y\_B\_301,3WTN\_N2Y\_D\_301,3WYP\_BTN\_D\_1001,3WZD\_LEV\_A\_1201,3WZN\_BTN\_A\_1001,3ZKP\_E  
RB\_A\_413,3ZLL\_4WF\_A\_400,3ZLR\_X0B\_B\_1204,3ZP9\_9TH\_A\_1001,3ZSO\_O2N\_A\_1219,3ZSY\_OM3\_  
B\_1214,43CA\_NPO\_G\_924,4A4V\_YFD\_A\_999,4AB8\_VXU\_A\_1253,4AB9\_VXQ\_A\_1251,4ABK\_AR6\_A\_  
2389,4ABU\_FT1\_A\_1125,4ABU\_FT1\_B\_1125,4ACI\_CIT\_A\_1189,4AGM\_P86\_B\_400,4AGQ\_P96\_A\_1291,

4AHV\_Z5P\_B\_1216,4AI5\_ADK\_E\_400,4AIA\_ADK\_E\_400,4AJ1\_AJ1\_A\_1333,4AJ1\_AJ1\_B\_1333,4AJ2\_52  
C\_A\_1333,4AJ2\_52C\_B\_1333,4AJ4\_VAB\_D\_1334,4AJJ\_88S\_D\_1332,4AJL\_88W\_B\_1333,4AJO\_88N\_C\_1  
334,4AL4\_W7E\_A\_1334,4ALG\_1GH\_A\_1146,4ANS\_VGH\_A\_9000,4AQH\_TB7\_B\_1380,4AQH\_TB7\_C\_1  
380,4ARW\_HNR\_B\_400,4ASJ\_N6A\_D\_1294,4AT5\_MUJ\_A\_1839,4AVJ\_J73\_B\_201,4AVV\_GHE\_E\_1207,  
4AWJ\_V6F\_C\_1201,4AZB\_OAN\_A\_1606,4AZG\_OAN\_A\_2040,4B0J\_3MQ\_K\_1172,4B0J\_3MQ\_N\_1172,4  
B2L\_TR7\_A\_1351,4B32\_03V\_A\_1351,4B3C\_5H1\_A\_1351,4B3D\_5MI\_A\_1351,4B5T\_2KT\_A\_4000,4B5W  
\_PYR\_D\_1256,4B5W\_PYR\_F\_1257,4B74\_1LH\_B\_1721,4B76\_PW1\_A\_1721,4B7S\_QLE\_A\_1408,4BCQ\_TJ  
F\_A\_1296,4BJ8\_BTN\_A\_1123,4BJ8\_BTN\_F\_1123,4BQP\_VMY\_B\_1271,4BR3\_U85\_B\_1458,4BTJ\_ATP\_B  
\_1338,4BV9\_NDP\_B\_1312,4C6X\_TLM\_B\_1418,4C9X\_VHS\_A\_1157,4CET\_FAD\_A\_1225,4CNZ\_ADP\_A\_  
1113,4CO3\_ATP\_B\_113,4CQE\_CQE\_A\_1721,4CSD\_MFU\_A\_306,4CX1\_HW9\_A\_800,4D81\_ADP\_A\_1364  
\_4D86\_ADP\_A\_1202,4DCS\_GDP\_A\_501,4DCY\_L2M\_A\_629,4DDH\_MS0\_A\_403,4DDK\_OHN\_B\_401,4DD  
M\_OHO\_A\_406,4DEU\_NAR\_B\_202,4DO1\_ANN\_D\_502,4DUF\_SRO\_C\_501,4DUF\_SRO\_D\_501,4DUH\_R  
LI\_A\_301,4DZY\_WJ1\_A\_404,4E0X\_KAI\_B\_301,4EAR\_IM5\_A\_301,4EAR\_IM5\_C\_301,4EDF\_UPG\_D\_50  
1,4EFK\_OOC\_A\_401,4EGK\_RDC\_A\_301,4EGN\_TWO\_C\_506,4EII\_ZMA\_A\_2401,4EJG\_NCT\_A\_501,4EJ  
H\_OQA\_E\_502,4EJJ\_NCT\_C\_501,4EKQ\_NPO\_B\_202,4EMF\_M7G\_A\_304,4ER0\_AW1\_A\_501,4ER3\_OQK  
\_A\_401,4ERF\_OR3\_A\_201,4EUO\_ABU\_A\_404,4F2W\_TDI\_B\_301,4FEM\_ACX\_A\_401,4FIL\_OUE\_A\_401,4  
FIL\_OUE\_D\_401,4FVR\_ATP\_A\_901,4FZJ\_OW1\_A\_405,4G47\_TZF\_A\_406,4G48\_PZB\_A\_405,4G5F\_15N  
\_B\_402,4G5Y\_OOC\_A\_403,4G8R\_96P\_B\_403,4GAH\_OET\_B\_601,4GE1\_TSS\_A\_201,4GGZ\_BTN\_A\_900,4  
GJ8\_OLU\_A\_1002,4GUJ\_SKM\_B\_303,4GV8\_DUP\_B\_201,4GWK\_3PG\_A\_504,4H5D\_POP\_F\_402,4H5E\_Y  
S4\_F\_401,4HBM\_OY7\_A\_201,4HBM\_OY7\_D\_201,4HFP\_15U\_B\_402,4HU1\_V13\_A\_302,4I54\_1C1\_B\_501,  
4I7E\_PEP\_C\_401,4I7E\_PEP\_D\_401,4I7J\_BNZ\_A\_202,4I8X\_6P3\_C\_401,4I8X\_6P3\_H\_401,4I9N\_1E6\_D\_40  
1,4I9N\_1E6\_H\_401,4ID1\_LF0\_A\_301,4IDN\_GNP\_B\_501,4IH7\_1ER\_B\_602,4JKW\_IPE\_A\_201,4JLH\_0L9  
\_A\_301,4JN4\_ATP\_B\_1002,4JSZ\_FB2\_A\_302,4JV8\_1M1\_B\_201,4JV8\_1M1\_B\_202,4JZX\_476\_A\_402,4JZX  
\_476\_B\_402,4K55\_H6P\_A\_201,4K6I\_9RA\_A\_500,4K7O\_EKZ\_B\_201,4K9Y\_K9Y\_A\_701,4KCX\_1QK\_A\_  
201,4KKH\_1RQ\_A\_501,4KP5\_EIF\_C\_302,4KPA\_140\_A\_502,4L23\_X6K\_A\_1101,4L40\_DCR\_A\_502,4L4V  
\_1VY\_A\_301,4L6S\_1WQ\_B\_1100,4LH5\_LF0\_A\_301,4LHV\_GDP\_B\_201,4LHV\_GDP\_C\_201,4LK7\_04G\_  
\_A\_202,4LK7\_04G\_C\_202,4LL3\_017\_A\_201,4LL3\_017\_A\_202,4LOQ\_SB4\_D\_401,4LPS\_GDP\_B\_302,4LU3  
\_AZM\_A\_302,4LUV\_1XS\_A\_201,4LUW\_QJ8\_A\_503,4LUZ\_1XT\_A\_201,4LV4\_8HC\_A\_403,4LV9\_20J\_B  
\_602,4M13\_1E0\_A\_701,4M2V\_BZ1\_A\_302,4M49\_22Y\_D\_802,4MHW\_OYN\_A\_201,4MJO\_2C1\_B\_401,4M  
JO\_2C1\_F\_401,4MMP\_SLB\_A\_401,4MP7\_PFT\_A\_501,4MSU\_2EU\_A\_701,4NG2\_OHN\_B\_201,4NJ3\_2KD  
\_A\_301,4NKW\_PLO\_A\_601,4NO4\_LAT\_D\_201,4NP9\_I3P\_A\_601,4OAG\_ADP\_B\_502,4OAS\_2SW\_C\_201  
\_4ONC\_40B\_A\_500,4OOF\_FOM\_A\_402,4OUJ\_LBT\_A\_401,4PIN\_AVI\_A\_401,4POP\_2VY\_A\_201,4POV\_2  
VY\_A\_201,4PP3\_2VZ\_A\_500,4PYY\_V14\_A\_302,4Q1W\_017\_A\_104,4Q26\_NLC\_A\_201,4Q3Q\_ABH\_C\_40  
5,4Q3S\_X7A\_A\_403,4Q3S\_X7A\_D\_403,4Q3U\_NNH\_A\_405,4QAC\_KK3\_J\_302,4QIJ\_1HA\_B\_401,4QIJ\_1  
HA\_E\_401,4QIJ\_1HA\_H\_401,4QIJ\_1HA\_K\_401,4QIZ\_WWX\_B\_303,4QJ0\_WWX\_B\_303,4QMS\_1N1\_A\_4  
01,4QMU\_SKE\_A\_401,4QO7\_36V\_D\_802,4QSI\_EWZ\_A\_305,4QSI\_EWZ\_B\_302,4QXQ\_1YE\_A\_401,4Q  
XR\_1YE\_B\_401,4R57\_ACO\_L\_201,4RPN\_PCI\_B\_401,4RQL\_SNE\_A\_505,4RR7\_A3S\_A\_201,4RR9\_A3S  
\_A\_201,4RRD\_A3T\_A\_501,4RRG\_A3T\_A\_501,4RRG\_A3T\_B\_201,4RT1\_C2E\_B\_201,4RUS\_NAG\_E\_304,4  
RX8\_3YX\_A\_703,4S1B\_2BA\_D\_803,4TQ3\_GPP\_A\_401,4TQ3\_GPP\_B\_401,4TQK\_NAG\_A\_506,4TYL\_39  
O\_A\_1203,4U0F\_3A8\_A\_302,4U0W\_16G\_A\_301,4U5J\_RXT\_A\_601,4U5S\_3D0\_A\_502,4U7F\_K25\_B\_301,  
4U7G\_K17\_B\_303,4UGC\_1Q6\_A\_904,4UGD\_Q14\_A\_904,4UGW\_HW1\_A\_904,4UHI\_VFV\_A\_600,4UHI  
\_VFV\_C\_600,4UHL\_VFV\_B\_580,4UHL\_VFV\_G\_600,4UHL\_VFV\_H\_580,4UR9\_BK9\_B\_1717,4URY\_RV1  
\_S\_2046,4UU0\_TG1\_A\_1003,4W54\_PYJ\_A\_200,4W6Z ETF\_A\_404,4W9F\_3JU\_F\_301,4W9H\_3JF\_L\_301,  
4W9K\_3JO\_C\_301,4WF5\_WF4\_A\_201,4WGI\_3M6\_A\_402,4WIV\_3P2\_A\_201,4W00\_AGI\_B\_201,4W0E\_  
ADP\_A\_802,4W0E\_ADP\_B\_801,4W0E\_ADP\_B\_802,4WOP\_CTP\_A\_301,4WUP\_3UF\_A\_302,4WUP\_3UF  
\_B\_302,4WYG\_3W1\_B\_506,4WYP\_AMP\_A\_401,4X50\_3X8\_B\_301,4X5R\_3XO\_C\_301,4XOO\_FMN\_A\_5  
01,4XTW\_44M\_A\_301,4XTY\_44L\_B\_301,4XTZ\_594\_A\_301,4XU2\_44Q\_A\_300,4XU3\_44R\_A\_301,4XV4\_  
25T\_A\_302,4Y24\_TD2\_A\_201,4Y5D\_MT6\_A\_200,4YEE\_4CQ\_D\_202,4YEE\_4CQ\_H\_203,4YEE\_4CQ\_J\_2  
01,4YMH\_SAH\_B\_1001,4YMQ\_ZBD\_A\_603,4YRD\_3IT\_A\_402,4Z69\_DIF\_A\_1006,4ZB6\_GDS\_A\_300,4Z  
HF\_4OL\_F\_202,4ZHG\_4OL\_C\_202,4ZHG\_4OL\_E\_202,4ZJI\_4OQ\_A\_601,4ZLA\_BES\_E\_505,4ZME\_ADN  
\_B\_902,4ZOG\_VX6\_A\_601,4ZS4\_ATP\_A\_903,4ZVI\_4S4\_A\_401,4ZVN\_AO\_B\_303,4ZZD\_RBF\_A\_201,4Z  
ZX\_FSU\_B\_1584,5A14\_LQ5\_A\_1298,5AAB\_VGH\_A\_9000,5AB7\_MLC\_E\_1411,5AB7\_MLC\_F\_1412,5AD  
B\_XEB\_A\_800,5AFV\_JH5\_B\_1459,5AIV\_M1W\_A\_1200,5AM6\_38O\_B\_1763,5BVB\_DOG\_D\_201,5C3Q\_  
TDR\_B\_403,5C3Q\_TDR\_C\_403,5C3R\_HMU\_A\_403,5C6C\_CMP\_A\_304,5C7N\_BMF\_A\_801,5C8W\_PCG\_  
A\_302,5CC2\_CKA\_A\_301,5CFM\_4BW\_A\_401,5CHR\_4NC\_B\_202,5CP5\_EB0\_A\_201,5CSD\_ACD\_B\_201,  
5CSD\_ACD\_D\_201,5D1J\_56H\_A\_4000,5D25\_56M\_A\_201,5D3J\_L33\_A\_201,5D3N\_L40\_A\_201,5D7X\_XZ  
8\_A\_802,5DN9\_NAD\_A\_501,5DOH\_5DU\_B\_304,5DPV\_SKE\_A\_402,5DTW\_5F9\_D\_301,5DUW\_5GO\_C\_  
201,5DVI\_BGC\_A\_501,5DW1\_5GD\_D\_501,5E58\_CPZ\_C\_503,5E5G\_DTR\_A\_503,5E5G\_DTR\_A\_504,5E8  
A\_5KS\_A\_302,5EH7\_5O5\_A\_303,5ETP\_5RZ\_A\_209,5ETR\_5RW\_B\_202,5F1R\_42O\_A\_301,5F3Z\_5V5\_A\_  
1003,5F8Y\_X6X\_B\_203,5FE7\_5WU\_A\_902,5FG5\_5XF\_B\_802,5FNR\_XMS\_A\_1614,5FV9\_Y6W\_E\_1572,5

FWR\_3X8\_B\_182,5G1A\_7H1\_A\_373,5G1N\_PAL\_A\_3226,5G1N\_PAL\_F\_3226,5G46\_6VD\_A\_1510,5GGK  
\_MBE\_B\_301,5GGL\_6ZC\_A\_301,5GIC\_DLC\_A\_501,5GIE\_VDP\_A\_501,5GLZ\_BGC\_A\_800,5GMN\_949\_  
A\_302,5GVK\_G45\_C\_502,5GWE\_GWM\_A\_502,5H1T\_7FF\_A\_1103,5H1T\_7FF\_D\_1103,5H1V\_7FU\_A\_11  
03,5H2U\_1N1\_B\_501,5HF9\_HI6\_A\_607,5HIS\_60P\_A\_403,5HJG\_XDI\_B\_201,5I3X\_68J\_A\_401,5I6D\_AU6  
\_D\_402,5I7O\_S16\_B\_402,5I8P\_VQ7\_A\_501,5IBI\_69U\_A\_404,5IGM\_BMF\_A\_301,5IHH\_6B5\_B\_201,5IM3  
\_DTP\_A\_1002,5IM3\_DTP\_A\_1005,5IPC\_6CE\_A\_201,5IVY\_6EO\_A\_601,5IW8\_6EC\_A\_401,5J5G\_6GF\_J\_  
304,5J5I\_6GM\_I\_303,5JOX\_EDG\_B\_601,5JQ2\_140\_A\_502,5JSJ\_6PD\_B\_301,5K2D\_ZMA\_A\_1201,5KCP\_  
NAJ\_B\_377,5KHD\_C2E\_R\_201,5KHG\_CC7\_A\_701,5KLP\_IHP\_C\_401,5KO8\_IYR\_B\_302,5KQY\_017\_B\_1  
01,5L1W\_7PF\_A\_401,5L7V\_GNL\_A\_601,5L91\_C0R\_B\_504,5L94\_TES\_A\_502,5L9I\_SNW\_B\_401,5L9L\_G  
OP\_A\_401,5L9R\_OGA\_A\_503,5L9V\_OGA\_B\_502,5LBF\_UN9\_A\_502,5LDK\_ATP\_B\_201,5LDM\_2AM\_A  
\_201,5LJC\_RTL\_A\_201,5LOF\_70R\_A\_401,5LPK\_XDM\_F\_1201,5LVL\_537\_A\_401,5LWD\_79E\_E\_411,5M  
28\_MLR\_A\_401,5M5F\_7GR\_E\_408,5M9W\_7GR\_A\_412,5MAM\_SRO\_2\_101,5MAM\_SRO\_3\_103,5MB4\_  
NAG\_A\_513,5ML4\_RRQ\_B\_201,5MOE\_OQC\_B\_408,5MQE\_PKU\_B\_1201,5MZ8\_SIN\_D\_502,5NOF\_7K2\_  
A\_401,5N18\_8HZ\_A\_501,5N55\_8NN\_B\_502,5N5S\_NAP\_C\_501,5NKA\_91H\_A\_1001,5NKC\_90T\_A\_1001,  
5NKH\_8ZQ\_A\_1001,5NW0\_9BK\_F\_301,5NW1\_9BH\_L\_301,5NW2\_9B8\_C\_301,5O0B\_9FE\_C\_202,5SYN\_  
71T\_A\_301,5T46\_MGP\_A\_301,5T52\_NGA\_A\_303,5T7I\_LAT\_A\_401,5TB6\_77X\_A\_1201,5TCY\_5LC\_B\_4  
02,5TMP\_Z5A\_A\_214,5U00\_7OV\_A\_1001,5U00\_7OV\_D\_1001,5UNY\_8FD\_A\_804,5UT6\_8MY\_A\_901,5V  
5Y\_8X7\_A\_601,5VB5\_92A\_A\_602,5VCY\_DB8\_A\_401,5VSF\_9HG\_A\_3006,5VW8\_NAP\_A\_402,5W10\_C  
MP\_C\_201,5WBO\_A1Y\_B\_301,5WL0\_21G\_A\_801,5X66\_UMP\_B\_401,5X66\_UMP\_F\_401,6RNT\_2AM\_A  
\_105,7ABP\_FCA\_A\_307,8GPB\_AMP\_A\_940,9ABP\_GAL\_A\_308,  
3LFA\_1N1\_A\_361,3LGS\_ADE\_A\_269,3LGS\_ADE\_B\_269,3LGS\_ADE\_C\_269,3LHS\_SF8\_A\_501,3LI2\_SF  
8\_A\_501,3LI2\_SF8\_B\_501,3LJJ\_10U\_A\_501,3LJO\_11U\_A\_501,3LK0\_Z80\_B\_92,3LK1\_JKE\_A\_93,3LK8\_  
Z79\_A\_0,3LLE\_SGE\_A\_94,3LLE\_SGE\_B\_94,3LM1\_LEC\_A\_134,3LM1\_LEC\_C\_134,3LM1\_LEC\_E\_134,3  
LM1\_LEC\_I\_134,3LM1\_LEC\_M\_134,3LN1\_CEL\_A\_682,3LN1\_CEL\_B\_682,3LN1\_CEL\_C\_682,3LN1\_CE  
L\_D\_682,3LP7\_HAR\_A\_906,3LP7\_HAR\_B\_908,3LQ2\_TDP\_A\_887,3LQ2\_TDP\_B\_887,3LQ4\_TDP\_A\_887,  
3LQ4\_TDP\_B\_887,3LQG\_388\_A\_600,3LQL\_LDT\_A\_600,3LUD\_AMP\_B\_600,3LUD\_AMP\_C\_600,3LUJ\_  
U5P\_B\_1,3LXI\_CAM\_A\_423,3LXI\_CAM\_B\_423,3LXK\_MI1\_A\_1125,3LXN\_MI1\_A\_1,3LXO\_T3P\_A\_601  
,3LZU\_017\_A\_200,3LZV\_017\_A\_200,3LZW\_NAP\_A\_2000,3LZX\_NAP\_A\_2000,3LZX\_NAP\_B\_2001,3LZ  
Z\_GDP\_B\_173,3M0I\_ZST\_A\_600,3M3R\_BCD\_F\_663,3M3X\_JS7\_A\_264,3M3Z\_3F5\_A\_401,3M40\_J45\_A\_  
263,3M5E\_JDR\_A\_264,3M64\_393\_A\_600,3M67\_E36\_A\_262,3M6P\_BB2\_A\_194,3M6Q\_BB2\_A\_194,3M6R  
\_BB2\_A\_194,3M8U\_GDS\_A\_1,3M94\_M7M\_A\_1,3M96\_E38\_A\_265,3M98\_E02\_A\_263,3M9X\_XYP\_A\_40  
0,3MA0\_XYP\_A\_400,3MA0\_XYP\_B\_401,3MA0\_XYP\_C\_402,3MAM\_BET\_A\_1,3MB9\_ZST\_A\_600,3MB  
M\_717\_A\_165,3MBM\_717\_C\_163,3MC5\_393\_A\_600,3MCT\_3MC\_A\_600,3MDT\_VOR\_B\_506,3MDV\_CL  
6\_A\_506,3MDV\_CL6\_B\_506,3MDZ\_EZL\_A\_264,3MF5\_HJZ\_B\_571,3MG5\_BTN\_A\_5100,3MG5\_BTN\_C\_  
5300,3MG5\_BTN\_D\_5400,3MHI\_J90\_A\_263,3MHI\_J90\_A\_264,3MHO\_J43\_A\_265,3MJ1\_614\_A\_1,3MJ2\_  
MJG\_A\_1,3ML5\_AZM\_A\_264,3MMR\_ABH\_A\_551,3MNE\_DEX\_A\_784,3MNO\_DEX\_A\_784,3MNP\_DEX  
\_A\_784,3MO2\_E67\_A\_1,3MO2\_E67\_B\_2,3MO2\_E67\_C\_1236,3MO2\_E67\_D\_4,3MO2\_SAH\_C\_103,3MO2  
\_SAH\_D\_104,3MO5\_E72\_A\_1236,3MO5\_E72\_D\_4,3MO5\_SAH\_C\_103,3MO5\_SAH\_D\_104,3MS9\_STI\_A  
\_1,3MS9\_STI\_B\_1,3MSS\_MS7\_A\_516,3MSS\_MS7\_B\_516,3MSS\_MS7\_C\_516,3MSS\_MS7\_D\_516,3MSS\_  
STI\_A\_1,3MSS\_STI\_B\_1,3MSS\_STI\_C\_1,3MSS\_STI\_D\_1,3MUF\_S3P\_A\_201,3MYG\_EML\_A\_1,3MYQ\_E  
27\_A\_266,3N0M\_ACO\_A\_266,3N0M\_ACO\_B\_266,3N0S\_ACO\_A\_266,3N0S\_ACO\_B\_266,3N0S\_ACO\_C\_  
266,3N0S\_ACO\_D\_266,3N1C\_F6P\_A\_400,3N1C\_F6P\_B\_402,3N1C\_F6P\_C\_401,3N1C\_F6P\_D\_403,3N35\_  
A2G\_A\_401,3N3I\_ROC\_A\_201,3N5K\_TG1\_B\_1000,3N6K\_BFH\_F\_1,3N75\_G4P\_A\_716,3N75\_G4P\_B\_716  
,3N75\_G4P\_C\_716,3N75\_G4P\_D\_716,3N7A\_FA1\_A\_147,3N7A\_FA1\_B\_148,3N7A\_FA1\_C\_147,3N7A\_FA  
1\_D\_147,3N7A\_FA1\_E\_148,3N7A\_FA1\_F\_147,3N7A\_FA1\_G\_148,3N7A\_FA1\_I\_148,3N7A\_FA1\_J\_147,3  
N7A\_FA1\_L\_148,3N7A\_FA1\_M\_147,3N7A\_FA1\_N\_147,3N7A\_FA1\_O\_148,3N7A\_FA1\_P\_148,3N7A\_FA1  
\_Q\_148,3N7A\_FA1\_R\_147,3N7A\_FA1\_T\_148,3N7A\_FA1\_V\_148,3N7A\_FA1\_X\_148,3N7H\_DE3\_A\_129,3  
N7H\_DE3\_B\_132,3N8K\_D1X\_A\_147,3N8K\_D1X\_B\_147,3N8K\_D1X\_D\_147,3N8K\_D1X\_E\_147,3N8K\_D  
1X\_F\_147,3N8K\_D1X\_G\_147,3N8K\_D1X\_H\_147,3N8K\_D1X\_I\_147,3N8K\_D1X\_J\_147,3N8K\_D1X\_K\_14  
7,3N8K\_D1X\_M\_150,3N8K\_D1X\_N\_147,3N8K\_D1X\_O\_147,3N8K\_D1X\_R\_147,3N8K\_D1X\_S\_147,3N8K  
\_D1X\_T\_147,3N8K\_D1X\_V\_147,3N8K\_D1X\_W\_147,3N9S\_TD4\_A\_308,3N9S\_TD4\_B\_311,3NCQ\_ATP\_A  
\_201,3NCQ\_ATP\_B\_202,3NCQ\_ATP\_C\_200,3NCR\_ADP\_B\_120,3NCR\_ADP\_C\_120,3NDT\_ROC\_D\_100,3  
NDU\_ROC\_A\_101,3NDU\_ROC\_D\_100,3NDW\_RIT\_A\_100,3NDX\_RIT\_A\_100,3NEE\_B72\_A\_1,3NEO\_G2  
4\_A\_1,3NEO\_G24\_B\_1,3NES\_B72\_A\_1,3NES\_B72\_B\_1,3NEX\_G24\_A\_126,3NEX\_G24\_B\_126,3NHI\_EA  
H\_A\_1,3NJQ\_NJQ\_A\_197,3NJQ\_NJQ\_B\_198,3NK8\_JKZ\_A\_1,3NKK\_JLZ\_A\_1,3NPC\_B96\_A\_365,3NPC\_  
B96\_B\_365,3NQ3\_DKA\_A\_3053,3NRZ\_HPA\_C\_1,3NRZ\_HPA\_L\_1,3NU3\_478\_B\_401,3NU4\_478\_B\_401,  
3NU5\_478\_B\_401,3NU6\_478\_B\_401,3NU9\_478\_A\_401,3NUJ\_478\_B\_401,3NUO\_478\_B\_478,3NV6\_CAM  
\_A\_422,3NW3\_MU2\_D\_5369,3O4K\_LTC\_C\_172,3O4V\_4CT\_A\_233,3O4V\_4CT\_B\_234,3O56\_ZG1\_A\_506  
,3O73\_O73\_A\_239,3O73\_O73\_A\_240,3O84\_HTJ\_B\_995,3O8P\_BMU\_A\_361,3O8U\_BMU\_A\_361,3O9P\_M  
HI\_A\_516,3OAP\_9CR\_A\_500,3OBJ\_BMU\_A\_361,3OCP\_CMP\_A\_250,3OCP\_CMP\_B\_250,3OCS\_746\_A\_9

99,3OCT\_1N1\_A\_663,3OEW\_NAD\_A\_4345,3OEY\_NAD\_A\_4345,3OEZ\_STI\_A\_601,3OEZ\_STI\_B\_601,3O  
J8\_OJ8\_A\_1,3OJ8\_OJ8\_B\_1,3OKC\_GDP\_A\_601,3OLT\_ACD\_B\_1,3OO6\_GAL\_A\_405,3OOB\_KDH\_A\_40  
2,3OOB\_KDH\_A\_403,3OTF\_CMP\_A\_725,3OUJ\_AKG\_A\_417,3OVN\_MPV\_A\_213,3OVN\_MPV\_B\_213,3  
OXC\_ROC\_A\_401,3OXV\_478\_B\_200,3OXV\_478\_C\_200,3OXX\_DR7\_A\_100,3OXX\_DR7\_C\_100,3OXZ\_0  
LI\_A\_1,3OY4\_017\_B\_200,3OYW\_TDG\_A\_600,3OYW\_TDG\_B\_601,3OZD\_4CT\_A\_284,3OZD\_4CT\_B\_28  
4,3OZJ\_BGV\_C\_1,3OZU\_X89\_A\_411,3OZV\_ECN\_A\_411,3OZV\_ECN\_B\_411,3OZW\_KKK\_A\_413,3OZW  
\_KKK\_B\_413,3P2E\_SAH\_A\_6732,3P2E\_SAH\_B\_6732,3P2H\_NOO\_A\_300,3P2V\_DOY\_A\_600,3P3R\_3M1  
\_A\_128,3P3R\_3M1\_B\_128,3P3S\_3M2\_A\_128,3P3S\_3M2\_B\_128,3P3S\_3M2\_B\_129,3P3  
T\_3M3\_A\_128,3P3T\_3M3\_B\_128,3P7I\_P7I\_A\_313,3P8E\_LN7\_A\_286,3P8E\_LN7\_B\_286,3P8P\_LN6\_A\_28  
6,3P8P\_LN6\_B\_286,3P9T\_TCL\_A\_221,3P9T\_TCL\_A\_222,3PB3\_SAH\_A\_6732,3PB3\_SAH\_B\_6732,3PCJ\_I  
NO\_M\_550,3PCJ\_INO\_N\_550,3PCJ\_INO\_O\_550,3PCJ\_INO\_P\_550,3PCJ\_INO\_Q\_550,3PCJ\_INO\_R\_550,3  
PCK\_NNO\_M\_550,3PCK\_NNO\_N\_550,3PCK\_NNO\_O\_550,3PCK\_NNO\_P\_550,3PCK\_NNO\_Q\_550,3PCK  
\_NNO\_R\_550,3PCN\_DHY\_M\_550,3PCN\_DHY\_N\_550,3PCN\_DHY\_O\_550,3PCN\_DHY\_P\_550,3PCN\_DH  
Y\_Q\_550,3PCN\_DHY\_R\_550,3PCU\_LX8\_A\_1,3PD2\_A3S\_A\_500,3PD3\_A3T\_B\_148,3PD4\_A3G\_A\_500,3  
PD4\_A3G\_B\_501,3PG3\_DG7\_A\_362,3PJU\_C2E\_A\_2256,3PMA\_SCR\_B\_248,3PN4\_BB2\_A\_501,3PO1\_M  
KY\_C\_1,3PPP\_BET\_A\_401,3PPP\_BET\_B\_401,3PPQ\_CHT\_A\_401,3PPQ\_CHT\_B\_401,3PPR\_4CS\_A\_401,3  
PPR\_4CS\_B\_401,3PTY\_AFO\_A\_1,3PWM\_017\_B\_402,3PWR\_ROC\_A\_401,3PXF\_2AN\_A\_304,3PXQ\_2AN  
\_A\_300,3PXQ\_2AN\_A\_301,3PXQ\_2AN\_A\_302,3PXZ\_2AN\_A\_299,3PXZ\_JWS\_A\_301,3PY1\_2AN\_A\_301,  
3PY1\_2AN\_A\_302,3PY1\_SU9\_A\_300,3PYY\_3YY\_A\_538,3PYY\_3YY\_B\_532,3PYY\_STI\_B\_4,3Q6W\_Q6  
W\_A\_1,3Q6Z\_APR\_A\_1,3Q71\_AR6\_A\_800,3Q72\_GNP\_A\_256,3Q72\_GNP\_B\_256,3Q7P\_GNP\_A\_256,3Q7  
P\_GNP\_B\_256,3Q7Q\_GNP\_A\_1,3Q8H\_AO9\_A\_164,3Q8H\_AO9\_B\_165,3Q9N\_COA\_A\_1072,3Q9N\_COA  
\_B\_1072,3Q9O\_NAD\_A\_700,3Q9U\_COA\_A\_1070,3QBC\_B55\_A\_159,3QBC\_B55\_B\_163,3QDD\_94M\_A\_  
999,3QIN\_P1Y\_A\_700,3QIO\_QID\_A\_700,3QIP\_P4Y\_A\_900,3QKD\_HI0\_A\_218,3QKD\_HI0\_B\_218,3QLM  
\_PLM\_A\_127,3QND\_SIA\_B\_1,3QND\_SIA\_C\_1,3QND\_SIA\_E\_1,3QND\_SIA\_F\_1,3QND\_SIA\_G\_1,3QO3\_  
ATP\_A\_66,3QO3\_ATP\_C\_66,3QO3\_ATP\_D\_66,3QOA\_QO\_A\_501,3QOX\_SAH\_A\_417,3QQA\_TCH\_A\_2  
11,3QRI\_919\_A\_500,3QRI\_919\_B\_2,3QRJ\_919\_B\_1,3QSE\_SAR\_A\_401,3QSE\_SAR\_B\_401,3QSS\_MTG\_A  
\_405,3QSS\_MTG\_B\_405,3QT7\_FM0\_A\_328,3QUG\_GIX\_A\_700,3QUY\_QUY\_A\_291,3QUZ\_QUV\_A\_286,  
3QX8\_GTG\_A\_28,3QX8\_GTG\_B\_28,3QX8\_GTG\_C\_28,3QX9\_ATP\_A\_1,3QX9\_ATP\_B\_1,3QX9\_ATP\_C\_  
1,3QXC\_ATP\_A\_221,3QXH\_ADP\_A\_222,3QXT\_MTX\_A\_2000,3QXT\_MTX\_B\_2000,3QXV\_MTX\_B\_200  
0,3QXV\_MTX\_D\_2000,3QXV\_MTX\_E\_2000,3QYY\_C2E\_A\_487,3R0Y\_RSZ\_A\_301,3R1V\_AZB\_A\_128,3  
R1V\_AZB\_B\_128,3R24\_SAM\_A\_302,3R32\_4CO\_A\_152,3R32\_4CO\_A\_170,3R35\_4CO\_A\_170,3R35\_4CO  
\_B\_170,3R37\_4CO\_A\_152,3R37\_4CO\_B\_152,3R3B\_4CO\_A\_170,3R3B\_4CO\_B\_170,3R3C\_4CO\_A\_152,3R  
3C\_4CO\_B\_152,3R3D\_4CO\_A\_152,3R3D\_4CO\_B\_152,3R3F\_4CO\_A\_152,3R3F\_4CO\_B\_152,3R51\_MMA  
\_A\_200,3R52\_GYP\_A\_200,3R52\_GYP\_C\_200,3R52\_GYP\_D\_200,3R5N\_MLO\_A\_1,3R5N\_MLO\_A\_2,3R5  
R\_F42\_A\_1,3R5R\_F42\_B\_1,3R5R\_F42\_E\_1,3R5T\_VBN\_A\_1,3R5W\_F42\_A\_201,3R5W\_F42\_B\_201,3R5W  
\_F42\_D\_201,3R5W\_F42\_E\_201,3R5W\_F42\_K\_201,3R5W\_F42\_L\_201,3R5W\_F42\_M\_201,3R5W\_F42\_N\_2  
01,3R6U\_CHT\_A\_285,3R7O\_M61\_A\_1,3R8I\_XCX\_A\_1,3R96\_AMP\_A\_500,3R96\_AMP\_B\_500,3R9C\_EC  
L\_A\_451,3RDM\_BTN\_A\_300,3RDO\_BTN\_A\_300,3RDQ\_DTB\_A\_300,3RE4\_TO1\_B\_259,3RGF\_BAX\_A\_  
465,3RHJ\_NAP\_A\_101,3RHJ\_NAP\_B\_101,3RHJ\_NAP\_C\_101,3RHJ\_NAP\_D\_101,3RHO\_NAP\_A\_903,3RH  
O\_NAP\_B\_903,3RHO\_NAP\_C\_903,3RHO\_NAP\_D\_903,3RHQ\_NAP\_A\_903,3RHQ\_NAP\_C\_903,3RHR\_N  
DP\_A\_903,3RHR\_NDP\_B\_903,3RHR\_NDP\_C\_903,3RHR\_NDP\_D\_903,3RI1\_3RH\_A\_2,3RI1\_3RH\_B\_1,3R  
J5\_NAD\_A\_850,3RJ9\_NAD\_A\_850,3RJ9\_NAD\_B\_850,3RJ9\_NAD\_D\_850,3RJ9\_NAD\_E\_850,3RLB\_VIB\_  
A\_191,3RLB\_VIB\_B\_187,3RLP\_3RP\_A\_901,3RLP\_3RP\_B\_901,3RM4\_3RM\_A\_1,3RM9\_613\_A\_1,3RM9\_  
613\_B\_1,3RS8\_APR\_A\_493,3RS8\_APR\_A\_494,3RSR\_N5P\_A\_841,3RSX\_RSV\_A\_397,3RT4\_LP5\_C\_501,3  
RUG\_DB6\_A\_303,3RUG\_DB6\_C\_303,3RUX\_BS5\_A\_1001,3RUX\_BS5\_B\_1002,3RW9\_DSH\_B\_303,3RY2  
\_BTN\_A\_5001,3RY8\_FLC\_A\_1,3RYJ\_RYJ\_B\_1,3RYX\_RYX\_B\_1,3RYY\_RYY\_A\_262,3RYY\_RYY\_A\_26  
3,3RYZ\_RYZ\_A\_262,3RZ0\_RZ0\_B\_1,3RZ5\_RZ5\_A\_262,3RZ7\_RZ7\_A\_262,3RZ8\_RZ8\_A\_262,3S0B\_FNA  
\_A\_120,3S0E\_EOL\_A\_120,3S43\_478\_A\_401,3S53\_017\_A\_201,3S53\_017\_B\_203,3S54\_017\_B\_201,3S56\_R  
OC\_A\_201,3S56\_ROC\_B\_101,3S71\_EVD\_B\_1,3S72\_EVE\_B\_1,3S73\_EVF\_B\_1,3S73\_EVF\_B\_263,3S74\_03  
T\_B\_1,3S74\_03T\_B\_263,3S75\_EVG\_B\_1,3S75\_EVG\_B\_263,3S76\_EVH\_A\_262,3S77\_EVI\_B\_1,3S77\_EVI  
\_B\_263,3S78\_EVJ\_B\_1,3S78\_EVJ\_B\_263,3S7B\_NH5\_A\_439,3S8X\_E59\_A\_266,3SAP\_E2I\_A\_266,3SBH\_E6  
5\_A\_266,3SBI\_E90\_A\_266,3SFG\_2TU\_B\_601,3SFG\_2TU\_C\_601,3SIE\_5BO\_A\_1,3SIE\_5BO\_B\_1,3SJ7\_N  
DP\_A\_245,3SJ7\_NDP\_B\_245,3SJT\_5AB\_B\_552,3SK2\_GRI\_A\_130,3SKK\_4U7\_A\_551,3SKK\_4U7\_B\_552,  
3SL1\_FB6\_A\_414,3SMQ\_TDU\_A\_1,3SMR\_NP7\_A\_1000,3SMR\_NP7\_B\_1000,3SMR\_NP7\_D\_1000,3SW7\_  
19K\_A\_299,3SXR\_1N1\_A\_1,3SXR\_1N1\_B\_2,3SYU\_2GP\_A\_105,3T0W\_DIW\_A\_204,3T0X\_DIW\_A\_201,3  
TIM\_DQT\_A\_1,3T2C\_13P\_A\_412,3T2W\_BTN\_A\_600,3T3Q\_9PL\_A\_501,3T3Q\_9PL\_B\_501,3T3Q\_9PL\_C  
\_501,3T3Q\_9PL\_D\_501,3T3R\_9PL\_A\_501,3T3R\_9PL\_B\_501,3T3R\_9PL\_C\_501,3T3R\_9PL\_D\_501,3T4N\_  
ADP\_C\_324,3T6F\_BTN\_A\_5100,3T6F\_BTN\_B\_5200,3TAO\_PGH\_A\_268,3TAO\_PGH\_A\_269,3TAY\_MN0  
\_A\_1000,3TAY\_MN0\_B\_1000,3TB6\_ARB\_A\_400,3TB6\_ARB\_B\_400,3TC5\_3T5\_A\_164,3TCT\_3MI\_A\_12  
8,3TCT\_3MI\_B\_128,3TD4\_API\_A\_401,3TD4\_API\_B\_401,3TD4\_API\_C\_401,3TD4\_API\_D\_401,3TD4\_API



\_E\_401,3TD4\_API\_F\_401,3TD4\_API\_G\_401,3TD4\_API\_H\_401,3TDH\_AMP\_C\_323,3TE5\_NAI\_C\_324,3T  
EA\_4CO\_A\_152,3TEA\_4CO\_A\_200,3TIF\_AD\_P\_236,3TKG\_ROC\_C\_901,3TKM\_GW0\_A\_1,3TKW\_017  
\_B\_401,3TL9\_ROC\_A\_401,3TMK\_T5A\_A\_217,3TMK\_T5A\_B\_217,3TMK\_T5A\_C\_217,3TMK\_T5A\_D\_21  
7,3TMK\_T5A\_E\_217,3TMK\_T5A\_F\_217,3TMK\_T5A\_G\_217,3TMK\_T5A\_H\_217,3TNZ\_IYR\_A\_302,3TSK  
\_QEG\_A\_306,3TTC\_AD\_P\_747,3TTC\_AD\_P\_748,3TTM\_PUT\_A\_367,3TTM\_PUT\_B\_367,3TTN\_SPD\_  
\_A\_363,3TTN\_SPD\_B\_363,3TVL\_3PO\_A\_231,3TVL\_3PO\_B\_231,3TZ0\_03H\_A\_389,3TZ4\_03H\_A\_390,3TZ  
I\_ACD\_A\_1,3TZI\_ACD\_B\_1,3TZM\_085\_A\_1,3U15\_03M\_A\_1,3U15\_03M\_C\_1,3U15\_03M\_D\_1,3U3U\_EA  
H\_C\_236,3U5L\_08K\_A\_1,3U6W\_KIV\_A\_427,3U6W\_KIV\_B\_427,3U90\_SDS\_A\_175,3UA1\_08Y\_A\_600,3  
UBD\_SL0\_A\_400,3UCB\_017\_A\_201,3UCB\_017\_B\_202,3UDD\_34M\_A\_1,3UDD\_34M\_B\_1,3UDV\_JIC\_A  
\_171,3UE4\_DB8\_A\_601,3UE4\_DB8\_B\_601,3UEU\_DAO\_A\_2871,3UEV\_MYR\_A\_5412,3UFN\_ROC\_A\_40  
1,3UFN\_ROC\_A\_402,3UFU\_HW8\_A\_800,3UFU\_HW8\_B\_800,3UH4\_XAV\_B\_1,3UIL\_DAO\_D\_202,3UJ9\_  
PC\_A\_301,3UJC\_PC\_A\_301,3UJD\_PC\_A\_301,3ULK\_NDP\_B\_492,3UMQ\_BUA\_A\_172,3UN3\_G16\_A\_399  
,3UN3\_G16\_C\_399,3U00\_G16\_A\_398,3U04\_OC0\_A\_1,3UOD\_OC3\_A\_1,3UOL\_OC7\_A\_2,3UOL\_OC7\_B\_1  
,3UP2\_OC8\_A\_1,3UPK\_UD1\_A\_427,3USX\_MYR\_B\_172,3UUG\_BDP\_A\_331,3V2M\_AZM\_A\_303,3V2N\_  
MYR\_A\_1,3V2P\_STE\_A\_1,3V2Q\_PLM\_A\_101,3V2Q\_PLM\_E\_101,3V3L\_V3L\_A\_1,3V3L\_V3L\_B\_1,3V3  
Q\_TMY\_A\_301,3V3Q\_TMY\_A\_302,3V4T\_UD1\_A\_501,3V4T\_UD1\_B\_501,3V4T\_UD1\_C\_501,3V4T\_UD1  
\_D\_501,3V4T\_UD1\_E\_501,3V4T\_UD1\_F\_501,3V4T\_UD1\_G\_501,3V4T\_UD1\_H\_501,3V78\_ET\_A\_301,3V  
78\_ET\_B\_301,3VHA\_VHA\_A\_237,3VHC\_VHC\_A\_1,3VHD\_VHE\_A\_1,3VHD\_VHE\_B\_1,3VHE\_42Q\_A\_1  
170,3VJC\_ZGA\_A\_400,3VJC\_ZGA\_B\_400,3VJC\_ZGA\_C\_400,3VJC\_ZGA\_D\_400,3VJE\_ZGA\_A\_301,3VJ  
E\_ZGA\_B\_301,3VQH\_IQB\_A\_401,3VSP\_EK8\_A\_501,3VVH\_4BM\_B\_503,3VVH\_4BM\_C\_503,3VVY\_ET  
\_A\_301,3VVY\_ET\_B\_301,3VVY\_ET\_C\_301,3VVY\_ET\_D\_301,3VW1\_CVI\_B\_301,3VW1\_CVI\_D\_301,3V  
W2\_BER\_A\_301,3VW2\_BER\_B\_301,3VW2\_BER\_C\_301,3VW2\_BER\_D\_301,3VWS\_VWS\_A\_1004,3VX3  
\_ADP\_A\_301,3VX3\_AD\_P\_B\_301,3W07\_U5P\_A\_301,3W5N\_RAM\_A\_1202,3W5N\_RAM\_A\_1203,3W5N\_  
RAM\_A\_1204,3W5N\_RAM\_A\_1205,3W5N\_RAM\_A\_1206,3W9K\_MYR\_A\_201,3WB4\_0B3\_A\_507,3WB5  
\_0B4\_A\_507,3WHA\_WHA\_A\_302,3WHA\_WHA\_B\_301,3WIS\_FMN\_A\_201,3WIS\_FMN\_A\_202,3WQM\_  
B29\_A\_401,3WTJ\_TH4\_A\_301,3WTJ\_TH4\_B\_301,3WTJ\_TH4\_C\_301,3WTJ\_TH4\_D\_301,3WTJ\_TH4\_E\_3  
01,3WTL\_N1Y\_A\_301,3WTL\_N1Y\_B\_301,3WTL\_N1Y\_E\_301,3WTM\_N1Y\_A\_301,3WTM\_N1Y\_B\_301,3  
WTM\_N1Y\_C\_301,3WTM\_N1Y\_D\_301,3WTM\_N1Y\_E\_301,3WTN\_N2Y\_A\_301,3WTN\_N2Y\_C\_301,3W  
TN\_N2Y\_E\_301,3WTN\_N2Y\_F\_301,3WTN\_N2Y\_G\_301,3WTN\_N2Y\_H\_301,3WTN\_N2Y\_J\_301,3WTO\_  
N2Y\_A\_301,3WTO\_N2Y\_B\_301,3WTO\_N2Y\_C\_301,3WTO\_N2Y\_E\_301,3WYP\_BTN\_A\_1001,3WYQ\_B  
TN\_B\_1001,3WZE\_BAX\_A\_1201,3WZN\_BTN\_B\_1001,3WZQ\_ZOF\_A\_1001,3WZQ\_ZOF\_B\_1001,3WZQ\_  
\_ZOF\_C\_1001,3ZBF\_VGH\_A\_3000,3ZCM\_PX3\_A\_1214,3ZCM\_PX3\_B\_1216,3ZCW\_4A2\_A\_1366,3ZCW  
\_4A2\_A\_1367,3ZHY\_FM6\_A\_501,3ZHZ\_FM7\_A\_1390,3ZI0\_FM8\_A\_501,3ZK5\_Z18\_A\_1408,3ZK5\_Z18\_  
B\_1408,3ZK6\_H11\_A\_1198,3ZK6\_H11\_B\_1198,3ZLL\_4WF\_B\_400,3ZLL\_4WF\_C\_400,3ZLL\_4WF\_D\_400,  
3ZLN\_H0Y\_A\_1197,3ZLR\_X0B\_A\_1198,3ZM9\_QMQ\_A\_1458,3ZM9\_QMQ\_B\_1458,3ZNN\_4WL\_A\_360,  
3ZNN\_4WL\_B\_360,3ZNO\_SE5\_A\_360,3ZNO\_SE5\_B\_360,3ZNP\_SE2\_A\_360,3ZQE\_DXC\_B\_1079,3ZSH\_  
469\_A\_400,3ZSI\_52P\_A\_1000,3ZSO\_O2N\_B\_1217,3ZSQ\_O4N\_A\_1215,3ZSQ\_O4N\_B\_1213,3ZSX\_N44\_  
A\_1215,3ZSX\_N44\_B\_1217,3ZSY\_OM3\_A\_1214,3ZSZ\_OM2\_A\_1215,3ZSZ\_OM2\_B\_1216,3ZT0\_ZT0\_A\_  
1213,3ZT0\_ZT0\_B\_1213,3ZT1\_OM1\_A\_1215,3ZT1\_OM1\_B\_1216,3ZT2\_ZT2\_A\_1216,3ZT2\_ZT2\_A\_  
1216,3ZT2\_ZT2\_B\_1214,3ZT2\_ZT2\_B\_1215,3ZT3\_ZT4\_A\_1216,3ZT3\_ZT4\_B\_1216,3ZT4\_ZT4\_A\_  
1216,3ZT4\_  
ZT2\_A\_1217,3ZT4\_ZT2\_B\_1214,3ZT4\_ZT2\_B\_1215,3ZVU\_A8S\_A\_192,3ZXE\_PGZ\_A\_1,3ZXE\_PGZ\_B\_1  
,3ZY2\_GDP\_A\_1381,3ZY3\_GDP\_A\_1384,3ZY3\_GDP\_B\_1381,3ZY5\_GFB\_A\_1386,3ZY6\_GFB\_A\_1381,3  
ZYF\_147\_B\_1002,3ZYF\_147\_C\_1003,3ZYF\_147\_D\_1004,3ZYU\_1GH\_A\_1173,43CA\_NPO\_A\_921,43CA\_  
NPO\_C\_922,43CA\_NPO\_E\_923,4A22\_TD4\_A\_1344,4A4W\_YFB\_A\_999,4A4W\_YFB\_B\_999,4A6S\_GS9\_A\_  
1123,4A6S\_GS9\_B\_1123,4A6S\_GS9\_C\_1123,4A6S\_GS9\_D\_1123,4ABA\_SW1\_A\_1256,4ABB\_K9S\_A\_12  
52,4ABD\_SW2\_A\_1252,4ABE\_913\_A\_1254,4ABF\_513\_A\_1252,4ABG\_91B\_A\_1255,4ABH\_7Z3\_A\_1253,  
4ABV\_FT2\_A\_1125,4ABV\_FT2\_B\_1125,4ACI\_CIT\_B\_1190,4AD6\_GSY\_B\_1159,4AGM\_P86\_A\_400,4AG  
N\_NXG\_A\_1294,4AGN\_NXG\_B\_1292,4AGO\_P74\_A\_1292,4AGO\_P74\_B\_1290,4AGP\_P51\_A\_1292,4AGP\_  
P51\_B\_1291,4AH9\_OMB\_A\_218,4AH9\_OMB\_B\_218,4AHR\_I2E\_A\_1218,4AHR\_I2E\_B\_1217,4AHS\_AKH  
\_A\_1216,4AHU\_ICO\_A\_1217,4AHU\_ICO\_B\_1220,4AHV\_Z5P\_A\_1219,4AI5\_ADK\_A\_400,4AI5\_ADK\_B\_  
400,4AI5\_ADK\_C\_400,4AIA\_ADK\_A\_400,4AIA\_ADK\_B\_400,4AIA\_ADK\_C\_400,4AIA\_ADK\_D\_400,4AI  
C\_FOM\_A\_1390,4AJ1\_AJ1\_C\_1333,4AJ1\_AJ1\_D\_1334,4AJ1\_OXM\_D\_1332,4AJ2\_52C\_C\_1333,4AJ2\_52C\_  
\_D\_1332,4AJ4\_VAB\_A\_1333,4AJ4\_VAB\_B\_1333,4AJ4\_VAB\_C\_1334,4AJE\_2B4\_A\_1332,4AJE\_2B4\_B\_1  
333,4AJE\_2B4\_C\_1333,4AJE\_2B4\_D\_1333,4AJH\_2B4\_B\_1334,4AJH\_2B4\_C\_1336,4AJH\_88S\_B\_1333,4A  
JH\_88S\_C\_1335,4AJH\_88S\_D\_1335,4AJI\_88R\_A\_1332,4AJI\_88R\_B\_1332,4AJI\_88R\_C\_1332,4AJI\_88R\_D\_  
\_1332,4AJJ\_88R\_B\_1333,4AJJ\_88R\_C\_1335,4AJJ\_88S\_A\_1332,4AJJ\_88S\_B\_1332,4AJJ\_88S\_C\_1334,4AJ  
K\_88S\_A\_1332,4AJK\_88S\_B\_1333,4AJK\_88S\_C\_1333,4AJK\_88S\_D\_1333,4AJL\_88W\_C\_1336,4AJL\_88W\_  
\_D\_1333,4AJN\_88V\_A\_1332,4AJN\_88V\_B\_1333,4AJN\_88V\_C\_1332,4AJN\_88V\_D\_1332,4AJO\_88N\_A\_1  
332,4AJO\_88N\_B\_1333,4AJO\_88N\_D\_1333,4AL4\_W7E\_A\_1333,4AL4\_W7E\_B\_1333,4AL4\_W7E\_C\_1332  
,4AL4\_W7E\_C\_1333,4AL4\_W7E\_D\_1332,4ANQ\_VGH\_A\_9000,4AQ4\_G3P\_A\_1415,4ARA\_C56\_A\_600,4

ARA\_C56\_B\_600,4ARB\_C57\_A\_1543,4ARB\_C57\_B\_1544,4ARO\_IHS\_A\_501,4ARO\_IHS\_A\_502,4ARW\_HNR\_A\_400,4ARW\_HNR\_C\_400,4ARW\_HNR\_D\_400,4AS7\_6LX\_A\_1375,4ASD\_BAX\_A\_1500,4ASJ\_N6\_A\_A\_1294,4ASJ\_N6A\_B\_1294,4ASJ\_N6A\_C\_1294,4AU7\_SAH\_A\_1247,4AUJ\_HNW\_A\_201,4AUY\_HNW\_A\_201,4AUY\_HNW\_B\_201,4AV0\_HNV\_A\_201,4AV0\_HNV\_B\_201,4AV4\_FVQ\_A\_201,4AV5\_FYZ\_A\_201,4AV5\_FYZ\_B\_201,4AV5\_FYZ\_C\_201,4AV5\_FYZ\_D\_201,4AVH\_FK9\_A\_201,4AVH\_FK9\_B\_201,4AVI\_XNS\_A\_201,4AVI\_XNS\_B\_201,4AVJ\_J73\_A\_201,4AVK\_FVQ\_A\_201,4AVV\_GHE\_A\_1207,4AVV\_GHE\_B\_1207,4AVV\_GHE\_C\_1207,4AVV\_GHE\_D\_1207,4AW8\_ZN\_A\_1193,4AWJ\_V6F\_F\_1205,4AWJ\_V6F\_I\_1206,4AWJ\_V6F\_L\_1206,4AXD\_ANP\_A\_600,4AYP\_SMD\_A\_503,4AYQ\_MVL\_A\_503,4AYR\_IFL\_A\_503,4AYU\_N8P\_A\_499,4AYU\_N8P\_B\_499,4AYU\_N8P\_C\_499,4AYU\_N8P\_D\_499,4AYU\_N8P\_E\_499,4AZ5\_NGW\_A\_1615,4AZC\_NGW\_A\_2042,4AZC\_NGW\_B\_2044,4AZC\_NGW\_C\_2041,4AZC\_NGW\_D\_2040,4AZG\_OAN\_B\_2041,4AZI\_OAN\_A\_2038,4AZI\_OAN\_B\_2040,4B0B\_54F\_A\_1172,4B0B\_54F\_B\_1172,4B0J\_3MQ\_A\_1172,4B0J\_3MQ\_B\_1172,4B0J\_3MQ\_D\_1172,4B0J\_3MQ\_E\_1172,4B0J\_3MQ\_H\_1172,4B0J\_3MQ\_I\_1172,4B0J\_3MQ\_J\_1172,4B0J\_3MQ\_L\_1172,4B0J\_3MQ\_M\_1172,4B0J\_3MQ\_O\_1172,4B0J\_3MQ\_Q\_1172,4B0J\_3MQ\_R\_1172,4B0J\_3MQ\_S\_1172,4B0J\_3MQ\_T\_1172,4B1J\_A1R\_A\_1966,4B1L\_FRU\_A\_1678,4B33\_1NP\_A\_1351,4B34\_ABV\_A\_1351,4B35\_4ME\_A\_1351,4B3D\_5MI\_A\_1352,4B3D\_5MI\_C\_1351,4B3D\_5MI\_D\_1352,4B5S\_PYR\_A\_1256,4B5S\_PYR\_B\_1256,4B5T\_2KT\_B\_4000,4B5W\_PYR\_A\_1259,4B5W\_PYR\_B\_1255,4B5W\_PYR\_C\_1255,4B5W\_PYR\_E\_1258,4B73\_4VA\_A\_1721,4B73\_4VA\_B\_1721,4B76\_PW1\_B\_1721,4B7P\_9UN\_A\_1226,4B7S\_QLE\_B\_1408,4BB9\_F1P\_A\_702,4BCQ\_TJF\_C\_1295,4BCS\_BTN\_A\_1128,4BCS\_BTN\_B\_1128,4BDR\_KAI\_A\_900,4BDR\_KAI\_B\_900,4BHF\_MZT\_A\_401,4B16\_PGA\_A\_401,4BI7\_PGA\_A\_401,4BJ8\_BTN\_B\_1123,4BJ8\_BTN\_C\_1123,4BJ8\_BTN\_D\_1123,4BJ8\_BTN\_E\_1123,4BJ8\_BTN\_G\_1123,4BJ8\_BTN\_H\_1123,4BJ8\_BTN\_I\_1123,4BJ8\_BTN\_J\_1123,4BJ8\_BTN\_K\_1123,4BJ8\_BTN\_L\_1125,4BJ8\_BTN\_M\_1124,4BJ8\_BTN\_N\_1123,4BJ8\_BTN\_O\_1123,4BJ8\_BTN\_P\_1124,4BJX\_73B\_A\_1169,4BK1\_3HB\_A\_1400,4BKJ\_STI\_A\_1000,4BKJ\_STI\_B\_1000,4BKS\_X6C\_C\_1203,4BKS\_X6C\_F\_1203,4BKS\_X6C\_I\_1206,4BKS\_X6C\_L\_1206,4BLJ\_70B\_A\_1251,4BMB\_LAT\_A\_1155,4BQG\_50Q\_A\_1225,4BQH\_9VU\_A\_1539,4BQJ\_XKL\_A\_1225,4BQO\_COA\_A\_1312,4BQO\_COA\_B\_1312,4BQP\_VMY\_A\_1272,4BQP\_VMY\_C\_1271,4BQP\_VMY\_D\_1271,4BQP\_VMY\_E\_1271,4BQP\_VMY\_F\_1271,4BQX\_UN9\_A\_601,4BR3\_U85\_A\_1458,4BTK\_DTQ\_A\_1337,4BUP\_SAM\_A\_500,4BUP\_SAM\_B\_500,4BUQ\_KGM\_A\_201,4BUQ\_KGM\_B\_201,4BV3\_OCZ\_A\_1394,4BV9\_NDP\_A\_1312,4BVA\_T3\_A\_1314,4BVA\_T3\_B\_1314,4C0C\_WVH\_A\_1460,4C1D\_X8Z\_A\_350,4C1D\_X8Z\_B\_350,4C1M\_NIH\_A\_606,4C1M\_NIH\_B\_606,4C4R\_YO5\_A\_1220,4C6U\_TLG\_A\_1421,4C71\_7RD\_A\_1423,4C71\_7RD\_B\_1419,4C73\_TLH\_A\_1427,4C73\_TLH\_B\_1421,4CB5\_93G\_A\_1484,4CC5\_L5V\_A\_1311,4CEB\_ZSV\_B\_1215,4CEB\_ZSV\_B\_1216,4CFK\_LY2\_A\_1170,4CFL\_8DQ\_A\_1169,4CGI\_NZL\_A\_1215,4CGI\_NZL\_B\_1214,4CGJ\_NZL\_B\_1214,4CIG\_X0P\_A\_1217,4CIG\_X0P\_B\_1217,4CJ4\_S3G\_A\_1217,4CJ4\_S3G\_B\_1215,4CJ5\_4VW\_A\_1216,4CJ5\_4VW\_B\_1214,4CJN\_QNZ\_B\_1673,4CJQ\_VXO\_A\_1214,4CJQ\_VXO\_B\_1216,4CJR\_FYM\_A\_1215,4CJR\_FYM\_B\_1216,4CK3\_K1T\_A\_1213,4CK3\_K1T\_B\_1216,4CKL\_SM8\_A\_1522,4CL6\_7SB\_A\_501,4CL6\_7SB\_B\_501,4CL6\_7SB\_C\_501,4CL6\_7SB\_D\_501,4CL6\_7SB\_E\_501,4CNK\_MEU\_A\_1393,4CNK\_MEU\_B\_1393,4CNK\_MEU\_B\_1394,4CNZ\_AD\_DP\_B\_1113,4CNZ\_ADP\_C\_1113,4CNZ\_ADP\_D\_1113,4CNZ\_ADP\_E\_1113,4CNZ\_ADP\_F\_1113,4CO0\_AD\_P\_A\_113,4CO0\_ADP\_B\_113,4CO1\_ADP\_A\_113,4CO1\_ADP\_B\_113,4CO1\_ADP\_C\_113,4CO2\_ADP\_A\_113,4CO2\_ADP\_B\_113,4CO4\_ATP\_A\_120,4CO4\_ATP\_B\_120,4COH\_T9H\_A\_1460,4COH\_T9H\_B\_1460,4CP5\_EOI\_A\_1156,4CP5\_EOI\_B\_1156,4CP5\_EOI\_C\_1156,4CP5\_EOI\_D\_1156,4CP5\_EOI\_E\_1156,4CP5\_EOI\_F\_1156,4CQE\_CQE\_B\_1721,4CQM\_NA\_P\_B\_301,4CQM\_NAP\_F\_301,4CQM\_NAP\_J\_301,4CQM\_NAP\_N\_301,4CQM\_NAP\_O\_301,4CRJ\_YH5\_A\_1163,4CRL\_C1I\_A\_1360,4CRZ\_ACO\_B\_1129,4CSD\_MFU\_A\_301,4CSD\_MFU\_A\_302,4CSD\_MFU\_A\_303,4CSD\_MFU\_A\_304,4CSD\_MFU\_A\_305,4CSD\_MFU\_B\_301,4CSD\_MFU\_B\_302,4CSD\_MFU\_B\_303,4CSD\_MFU\_B\_304,4CSD\_MFU\_B\_305,4CSD\_MFU\_B\_306,4CSS\_CWX\_A\_1159,4CU7\_GIF\_A\_1985,4CWB\_X6L\_A\_1163,4CWV\_HW8\_A\_800,4CWV\_HW8\_B\_800,4CWZ\_HW9\_A\_800,4CWZ\_HW9\_B\_800,4CX1\_HW9\_B\_800,4CX3\_HW8\_A\_800,4CX3\_HW8\_B\_800,4CX4\_HW9\_A\_800,4CX4\_HW9\_B\_800,4CX5\_HW8\_A\_800,4CX5\_HW8\_B\_800,4CYD\_CMP\_A\_1228,4CYD\_CMP\_B\_1228,4CYD\_CMP\_C\_1228,4CYD\_CMP\_D\_1226,4D1J\_DGJ\_A\_600,4D1J\_DGJ\_B\_600,4D1J\_DGJ\_C\_600,4D1J\_DGJ\_D\_600,4D1J\_DGJ\_E\_600,4D1J\_DGJ\_G\_600,4D1J\_DGJ\_H\_600,4D3H\_2BA\_A\_110,4D3H\_2BA\_B\_110,4D3H\_2BA\_C\_110,4D4U\_FUC\_A\_950,4D4U\_FUC\_B\_950,4D62\_SIA\_A\_1455,4D63\_SIA\_A\_1455,4D75\_PK9\_A\_600,4D7B\_TCW\_A\_1126,4D7B\_TCW\_B\_1126,4D86\_ADP\_A\_1201,4D8Z\_OJ2\_A\_305,4D8Z\_OJ2\_B\_306,4DAF\_OJ4\_A\_301,4DAF\_OJ4\_B\_301,4DAI\_OJ5\_B\_301,4DB7\_Z25\_A\_301,4DB7\_Z25\_B\_301,4DBM\_OJ0\_A\_302,4DBM\_OJ0\_B\_300,4DBM\_OJ0\_C\_300,4DBM\_OJ0\_D\_300,4DBM\_OJ0\_E\_306,4DCH\_4DC\_A\_502,4DCT\_GDP\_A\_501,4DCT\_GDP\_A\_502,4DCU\_GDP\_A\_502,4DCX\_L2D\_A\_630,4DCX\_L2D\_B\_620,4DCY\_L2M\_B\_611,4DDH\_MS0\_B\_401,4DDK\_OHN\_A\_401,4DDK\_OHN\_B\_402,4DDM\_OHO\_B\_401,4DDN\_AMG\_A\_200,4DDN\_AMG\_B\_200,4DDN\_AMG\_C\_200,4DDN\_AMG\_D\_200,4DE5\_OJD\_A\_401,4DE5\_OJD\_B\_401,4DEC\_3PG\_A\_403,4DEL\_PGH\_A\_404,4DER\_AGI\_A\_201,4DER\_AGI\_B\_201,4DES\_57D\_A\_201,4DES\_57D\_B\_201,4DET\_KMP\_B\_201,4DEU\_NAR\_A\_205,4DEW\_LU2\_A\_201,4DEW\_LU2\_B\_201,4DID\_GDP\_A\_200,4DKO\_OLM\_A\_513,4DKO\_OLM\_C\_513,4DKP\_OLL\_A\_513,4DKP\_OLL\_C\_513,4DKQ\_OLK\_A\_613,4DKR\_OLJ\_A\_513,4DKR\_OLJ\_C\_513,4DLI\_IRG\_A\_401,4DLI\_IRG\_A\_402,4DM6\_TTB\_A\_501,4DM6\_TTB\_B\_1501,4DM8\_REA\_A\_501,

4DM8\_REA\_B\_1501,4DMN\_0L9\_A\_305,4DMW\_UDP\_A\_602,4DN0\_C2E\_A\_501,4DN0\_C2E\_A\_502,4DO1\_ANN\_A\_502,4DO1\_ANN\_B\_502,4DO1\_ANN\_C\_502,4DON\_3PF\_A\_201,4DPR\_X8Z\_A\_702,4DQB\_017\_B\_101,4DQC\_017\_A\_101,4DQF\_017\_B\_101,4DQH\_017\_B\_101,4DRU\_0LN\_A\_601,4DST\_9LI\_A\_201,4DSU\_BZI\_A\_203,4DTW\_SRO\_A\_501,4DTW\_SRO\_B\_502,4DTZ\_LDP\_A\_501,4DTZ\_LDP\_B\_501,4DU2\_LD\_P\_A\_501,4DU2\_LDP\_B\_501,4DUB\_LDP\_A\_501,4DUB\_LDP\_B\_501,4DUE\_SRO\_B\_501,4DUF\_SRO\_A\_501,4DUF\_SRO\_B\_501,4DVE\_BTN\_A\_201,4DVE\_BTN\_B\_201,4DVE\_BTN\_C\_201,4E0X\_KAI\_A\_301,4E1K\_ON5\_A\_505,4E70\_N7I\_A\_403,4E70\_N7I\_B\_1402,4E96\_ONS\_A\_201,4EAR\_IM5\_B\_301,4EDF\_UPG\_A\_501,4EDF\_UPG\_B\_501,4EDF\_UPG\_C\_501,4EF4\_C2E\_A\_401,4EF6\_I2E\_A\_404,4EF6\_I2E\_B\_406,4EFK\_0OC\_A\_402,4EFK\_0OC\_B\_401,4EGN\_TWO\_A\_504,4EGN\_TWO\_B\_505,4EGN\_TWO\_D\_506,4EGO\_1F1\_A\_502,4EGO\_1F1\_A\_503,4EGO\_1F1\_A\_504,4EGO\_1F1\_B\_502,4EGO\_1F1\_B\_503,4EGO\_1F1\_C\_502,4EGO\_1F1\_C\_503,4EGO\_1F1\_D\_501,4EGO\_1F1\_D\_503,4EIN\_NOH\_A\_501,4EIN\_NOH\_B\_501,4EIP\_FAD\_A\_602,4EIP\_FAD\_B\_600,4EJ8\_1F1\_A\_106,4EJG\_NCT\_C\_501,4EJG\_NCT\_D\_501,4EJH\_0QA\_A\_502,4EJH\_0QA\_B\_502,4EJH\_0QA\_C\_502,4EJH\_0QA\_D\_502,4EJH\_0QA\_F\_502,4EJI\_0QA\_A\_502,4EJI\_0QA\_B\_503,4EJJ\_NCT\_A\_501,4EJJ\_NCT\_B\_501,4EJK\_IOP\_A\_101,4EJL\_IOP\_A\_106,4EK6\_10K\_A\_301,4EKQ\_NPO\_A\_202,4EKQ\_NPO\_A\_203,4EKV\_BTN\_A\_201,4EMI\_NAD\_A\_502,4EMR\_MGP\_A\_301,4EMT\_C2E\_A\_401,4EO3\_FMN\_B\_401,4EO6\_OS2\_A\_600,4EO6\_OS2\_B\_600,4EO8\_OS3\_A\_600,4EO8\_OS3\_B\_600,4EPY\_OQ\_Y\_A\_203,4ER6\_AW2\_A\_502,4ERF\_OR3\_C\_201,4ERF\_OR3\_E\_201,4ETZ\_C2E\_A\_501,4ETZ\_C2E\_B\_501,4EU0\_C2E\_A\_501,4EUV\_C2E\_A\_501,4EWN\_OVR\_D\_400,4EYR\_RIT\_B\_301,4EZ7\_2AN\_A\_302,4EZ7\_2AN\_A\_303,4EZ8\_NOH\_A\_401,4F1L\_ORY\_A\_1801,4F1L\_ORY\_B\_1801,4F1L\_ORY\_C\_1801,4F1L\_ORY\_D\_1801,4F1Y\_CNI\_A\_401,4F1Y\_CNI\_C\_401,4F2W\_TDI\_A\_301,4F3H\_C2E\_A\_501,4F3I\_0S6\_A\_203,4F5Y\_C2E\_A\_402,4F7V\_J1D\_A\_201,4F8J\_HC4\_A\_404,4F9Y\_GG5\_A\_401,4F9Y\_GG5\_A\_402,4F9Y\_LM3\_A\_403,4FCR\_0TM\_A\_301,4FFS\_BIG\_A\_301,4FHT\_DHB\_A\_201,4FHT\_DHB\_B\_201,4FIA\_0U9\_A\_601,4FIA\_198\_A\_602,4FIL\_0UE\_B\_401,4FIL\_0UE\_C\_401,4FKI\_09K\_A\_301,4FKL\_CK2\_A\_300,4FKO\_20K\_A\_301,4FKU\_60K\_A\_301,4FKU\_60K\_A\_303,4FL1\_ANP\_A\_701,4FL3\_ANP\_A\_701,4FLP\_JQ1\_A\_201,4FLP\_JQ1\_B\_201,4FMU\_0UM\_A\_1804,4FNN\_STE\_B\_201,4FQO\_AZ3\_A\_103,4FR3\_0V4\_A\_301,4FUT\_ATP\_A\_608,4FXP\_ADX\_A\_301,4FXP\_ADX\_B\_301,4FXP\_ADX\_C\_301,4FXQ\_G9L\_A\_501,4FXQ\_G9L\_B\_501,4FZJ\_0W1\_B\_401,4G0P\_U5P\_A\_801,4G0Q\_C5P\_A\_801,4G0Y\_AMP\_A\_801,4G0Z\_5GP\_A\_801,4G1X\_TQU\_A\_409,4G1X\_TQU\_A\_410,4G2G\_TDH\_A\_408,4G2R\_H1L\_A\_501,4G2R\_H1L\_A\_502,4G2R\_H1L\_B\_501,4G2R\_H1L\_B\_502,4G44\_TZM\_A\_405,4G44\_TZM\_A\_406,4G45\_MQN\_A\_407,4G45\_MQN\_A\_408,4G46\_TTY\_A\_406,4G5F\_0JD\_A\_402,4G5F\_15N\_A\_403,4G5Y\_0OC\_B\_403,4G5Y\_0OC\_B\_404,4G8M\_G8M\_A\_301,4G8M\_G8M\_B\_901,4G8N\_G8M\_A\_301,4G8R\_96P\_B\_402,4GAH\_0ET\_A\_301,4GD9\_BTN\_A\_5001,4GD9\_BTN\_B\_5001,4GD9\_BTN\_C\_5001,4GD9\_BTN\_D\_5001,4GDA\_BTN\_A\_5001,4GDA\_BTN\_B\_5001,4GE1\_TS\_S\_B\_201,4GE1\_TSS\_C\_201,4GE1\_TSS\_D\_201,4GGZ\_BTN\_B\_900,4GGZ\_BTN\_C\_900,4GGZ\_BTN\_D\_900,4GH8\_MTX\_A\_201,4GH8\_MTX\_B\_201,4GH8\_NDP\_A\_202,4GH8\_NDP\_B\_202,4GHI\_0X3\_A\_401,4GJ8\_0LU\_A\_1001,4GLW\_0XT\_A\_402,4GLW\_0XT\_B\_402,4GNY\_SDS\_A\_201,4GQ4\_0RT\_A\_601,4GQP\_B40\_H\_1201,4GS9\_0XB\_A\_401,4GU6\_10N\_A\_701,4GU6\_10N\_B\_701,4GU9\_4GU\_A\_701,4GU9\_4GU\_B\_701,4GUE\_QCT\_A\_401,4GUI\_QIC\_A\_301,4GUI\_QIC\_B\_301,4GUJ\_SKM\_A\_301,4GV8\_DUP\_A\_201,4GV8\_DUP\_C\_201,4GV8\_DUP\_D\_201,4GV8\_DUP\_E\_201,4GVM\_LF2\_A\_303,4GWI\_BDZ\_A\_205,4GWK\_3PG\_A\_501,4GZW\_SIA\_D\_502,4GZX\_SIA\_C\_801,4GZX\_SIA\_D\_801,4H5D\_YS4\_F\_401,4H5T\_ADP\_A\_401,4H81\_WJ2\_A\_404,4H85\_HRI\_A\_404,4HBM\_0Y7\_C\_201,4HBM\_0Y7\_E\_201,4HBM\_0Y7\_F\_201,4HBM\_0Y7\_G\_201,4HBM\_0Y7\_H\_201,4HFP\_15U\_D\_402,4HIQ\_16V\_A\_201,4HIQ\_16V\_B\_201,4HIS\_3MI\_A\_201,4HJ2\_LZ6\_A\_301,4HJ2\_LZ6\_B\_301,4HLA\_017\_A\_200,4HMQ\_FCE\_A\_401,4HSE\_ADP\_A\_602,4HT0\_V50\_A\_304,4HT2\_V50\_A\_302,4HT2\_V50\_B\_302,4HT2\_V50\_C\_302,4HT2\_V50\_D\_302,4HU1\_V13\_B\_302,4HVA\_4HV\_A\_401,4HVA\_4HV\_B\_401,4I3Z\_ADP\_A\_301,4I3Z\_ADP\_C\_301,4I4I\_PEP\_A\_401,4I4I\_PEP\_B\_401,4I4I\_PEP\_C\_401,4I4I\_PEP\_D\_401,4I53\_1C1\_A\_501,4I53\_1C1\_B\_501,4I54\_1C1\_A\_501,4I5M\_R78\_A\_401,4I60\_B1R\_A\_203,4I6G\_FAD\_A\_900,4I6G\_FAD\_B\_900,4I7E\_PEP\_A\_401,4I7E\_PEP\_B\_401,4I7J\_BNZ\_B\_202,4I7K\_MBN\_A\_202,4I7K\_MBN\_B\_204,4I7L\_IPH\_A\_202,4I7L\_IPH\_B\_202,4I7M\_2LP\_A\_202,4I7M\_2LP\_B\_202,4I7P\_ES3\_A\_202,4I7P\_ES3\_B\_202,4I89\_1FL\_A\_201,4I89\_1FL\_B\_201,4I8X\_6P3\_A\_401,4I8X\_6P3\_D\_401,4I8X\_6P3\_E\_401,4I8X\_6P3\_F\_401,4I8X\_6P3\_G\_401,4I91\_TMH\_A\_506,4I9H\_1E4\_A\_401,4I9H\_1E4\_C\_401,4I9H\_1E4\_D\_401,4I9H\_1E4\_E\_401,4I9H\_1E4\_F\_401,4I9H\_1E4\_G\_401,4I9H\_1E4\_H\_401,4I9N\_1E5\_A\_402,4I9N\_1E5\_B\_402,4I9N\_1E5\_C\_402,4I9N\_1E5\_D\_402,4I9N\_1E5\_E\_402,4I9N\_1E5\_F\_402,4I9N\_1E5\_G\_402,4I9N\_1E5\_H\_402,4I9N\_1E6\_A\_401,4I9N\_1E6\_B\_401,4I9N\_1E6\_C\_401,4I9N\_1E6\_E\_401,4I9N\_1E6\_F\_401,4I9Q\_K1I\_A\_701,4I9U\_1E7\_A\_401,4I9U\_1E7\_B\_401,4I9U\_1E7\_C\_401,4I9U\_1E7\_D\_401,4I9U\_1E7\_E\_401,4I9U\_1E7\_F\_401,4I9U\_1E7\_G\_401,4I9U\_1E7\_H\_401,4IA9\_IA9\_A\_401,4IBB\_1DK\_A\_401,4IBB\_1DK\_B\_401,4IBC\_12G\_A\_401,4IBC\_12G\_B\_401,4IBD\_1DL\_B\_401,4IBE\_11Y\_A\_401,4IBE\_11Y\_B\_401,4IBF\_1D5\_A\_401,4IBF\_1D5\_B\_401,4IBG\_1D6\_A\_401,4IBG\_1D6\_B\_401,4IBI\_1D8\_A\_401,4IBI\_1D8\_B\_401,4IBJ\_1D9\_A\_401,4IBJ\_1D9\_B\_401,4IBK\_1DE\_A\_401,4IBK\_1DE\_B\_401,4ICT\_1ED\_A\_406,4IDN\_GNP\_A\_501,4IDO\_GDP\_A\_501,4IDO\_GDP\_B\_501,4IEH\_1E9\_A\_201,4IH5\_12R\_A\_601,4IH5\_12R\_B\_601,4IH6\_1EP\_A\_601,4IH6\_1EP\_B\_601,4IH7\_1ER\_A\_602,4IJH\_1EJ\_A\_201,4IJH\_1EJ\_A\_202,4IJH\_1EJ\_A\_203,4IJH\_1EJ\_A\_204,4IJH\_1EJ\_A\_205,4IJL\_1EK\_A\_201,4IJL\_1EK\_A\_202,4IPI\_LMR\_A\_402,4IPI\_LM

R\_A\_403,4IPN\_1FT\_B\_501,4IPN\_1FT\_E\_501,4IPS\_1G4\_A\_404,4IPW\_1G7\_A\_406,4IQ7\_1G9\_A\_406,4IQ  
K\_IQK\_A\_701,4IRW\_BTN\_A\_213,4IRX\_INS\_B\_401,4IUE\_AJ4\_A\_1204,4IUO\_QIC\_A\_301,4IUO\_QIC\_B\_  
301,4JOM\_BLD\_B\_801,4JOS\_1H3\_A\_205,4J14\_X2N\_A\_602,4J1P\_1K0\_A\_501,4J21\_AJ6\_A\_1204,4J22\_AJ7  
\_A\_1204,4J22\_AJ7\_B\_1204,4J36\_1HR\_B\_402,4J3I\_1K0\_A\_201,4J3L\_AJ5\_A\_1204,4J74\_I18\_A\_201,4J74\_I  
18\_A\_202,4J7E\_I29\_A\_201,4J8T\_DOG\_A\_201,4J8T\_DOG\_B\_201,4J8T\_DOG\_C\_201,4J8T\_DOG\_D\_201,4J  
AL\_SAH\_A\_201,4JAL\_SAH\_B\_203,4JBQ\_VX6\_A\_501,4JE7\_BB2\_A\_201,4JE7\_BB2\_B\_201,4JFK\_JFK\_A\_  
201,4JFL\_1KY\_A\_201,4JFM\_1KZ\_A\_201,4JIN\_1L7\_A\_301,4JIQ\_1L5\_A\_402,4JLT\_8PR\_A\_505,4JMZ\_1  
M2\_A\_302,4JN4\_ATP\_A\_1002,4JNE\_ATP\_A\_1002,4JNE\_ATP\_B\_1002,4JNJ\_BTN\_A\_201,4JNJ\_BTN\_B\_2  
01,4JNJ\_BTN\_C\_201,4JNJ\_BTN\_D\_201,4JNK\_ZHK\_A\_803,4JNK\_ZHK\_C\_803,4JNK\_ZHK\_D\_802,4JSA\_  
FB2\_A\_303,4JSA\_FB2\_A\_304,4JSA\_SO4\_A\_305,4JSZ\_FB2\_A\_303,4JV6\_18F\_B\_201,4JV6\_18F\_B\_202,4J  
VB\_1M0\_B\_201,4JVF\_17X\_B\_201,4JWK\_CTN\_A\_201,4JWL\_HRC\_A\_301,4JX9\_URI\_A\_201,4JXH\_HRC  
\_A\_301,4JYB\_GNP\_A\_401,4JYB\_GNP\_B\_401,4JYC\_GDP\_D\_501,4JYM\_KKN\_A\_301,4JYM\_KKN\_B\_30  
1,4JZB\_P2H\_B\_402,4K0S\_AZM\_A\_302,4K10\_NI9\_A\_406,4K10\_NI9\_B\_405,4K10\_NI9\_C\_405,4K10\_NI9\_  
D\_405,4K13\_ETS\_A\_304,4K3H\_1OM\_A\_201,4K3H\_1OM\_D\_201,4K3H\_1OM\_E\_201,4K3H\_1OM\_G\_201,  
4K4J\_1O8\_A\_500,4K7I\_CAO\_A\_201,4K7I\_CAO\_B\_201,4K7N\_MCT\_A\_201,4K7N\_MCT\_B\_201,4K7O\_E  
KZ\_A\_201,4K7O\_EKZ\_C\_202,4K9T\_1RD\_A\_602,4K9T\_1RD\_A\_603,4K9W\_7AW\_A\_602,4K9W\_7AW\_B\_110  
1,4KAX\_GTP\_A\_201,4KBY\_C2E\_A\_401,4KCX\_IQK\_B\_201,4KEW\_1C6\_A\_502,4KEW\_1C6\_B\_502,4KE  
Y\_1C6\_A\_502,4KEY\_1C6\_B\_502,4KII\_RHL\_A\_201,4KLV\_KLV\_A\_216,4KM0\_CP6\_A\_201,4KM2\_TOP\_  
A\_202,4KM2\_TOP\_B\_202,4KN1\_04J\_A\_301,4KNE\_1CY\_A\_201,4KNE\_1CY\_B\_201,4KNI\_E1E\_A\_305,4  
KNJ\_E1F\_A\_302,4KNM\_E1E\_A\_302,4KNM\_E1E\_B\_302,4KNN\_E1F\_A\_302,4KNN\_E1F\_B\_302,4KO8\_A  
GS\_A\_800,4KO8\_AGS\_B\_800,4KOT\_CE3\_A\_205,4KOV\_KOV\_A\_204,4KOW\_CFX\_A\_204,4KP5\_E1F\_A\_  
302,4KP5\_E1F\_B\_302,4KP5\_E1F\_D\_302,4KP8\_E1G\_A\_302,4KP8\_E1G\_D\_302,4KS1\_2H8\_A\_502,4KS8\_  
B49\_A\_701,4KSY\_1SY\_A\_500,4KTF\_1TM\_A\_406,4KTJ\_KTJ\_A\_404,4KTK\_KTK\_A\_404,4KTK\_KTK\_A\_  
405,4KTL\_1CQ\_A\_407,4KU7\_PCG\_A\_425,4KV9\_GDP\_A\_500,4KV9\_GDP\_B\_500,4KVA\_GTP\_A\_500,4K  
VA\_GTP\_B\_500,4KZO\_NAP\_A\_502,4KZO\_NAP\_B\_502,4KZO\_NAP\_C\_502,4KZQ\_DFL\_A\_1201,4KZQ\_  
DFL\_B\_1201,4L03\_NAP\_A\_501,4L03\_NAP\_B\_501,4L03\_NAP\_C\_501,4L06\_NAP\_B\_502,4L06\_NAP\_C\_5  
02,4L06\_NAP\_D\_502,4L06\_NAP\_E\_502,4L4Z\_D5X\_A\_501,4L4Z\_D5X\_B\_401,4L50\_D8X\_A\_501,4L50\_D  
8X\_B\_401,4L51\_HSX\_A\_501,4L51\_HSX\_B\_401,4L5M\_HRC\_A\_302,4L6G\_CNL\_A\_502,4L6G\_CNL\_B\_50  
2,4L6S\_1WQ\_A\_1100,4L77\_CNL\_A\_502,4L77\_CNL\_B\_502,4L8A\_COA\_A\_204,4L9I\_8PR\_A\_601,4L9I\_8  
PR\_B\_601,4LBP\_1WG\_A\_201,4LCE\_KMT\_A\_402,4LHT\_CNL\_A\_502,4LHT\_CNL\_B\_502,4LHV\_GDP\_A\_  
201,4LHV\_GDP\_D\_201,4LHV\_GDP\_E\_201,4LJ3\_C2E\_A\_401,4LJ3\_C2E\_B\_401,4LK7\_04G\_B\_202,4LK7  
\_04G\_D\_202,4LMU\_QUE\_A\_401,4LNW\_T3\_A\_501,4LNW\_T3\_A\_502,4LNX\_T3\_A\_502,4LO1\_GAL\_A\_3  
01,4LO1\_GAL\_B\_301,4LOH\_1SY\_A\_401,4LOI\_1YC\_B\_401,4LOJ\_1SY\_B\_401,4LOK\_1YD\_B\_401,4LOO  
\_SB4\_A\_401,4LOP\_SB4\_A\_401,4LOP\_SB4\_B\_401,4LOP\_SB4\_C\_401,4LOP\_SB4\_D\_401,4LOQ\_SB4\_A\_4  
01,4LOQ\_SB4\_B\_401,4LOQ\_SB4\_C\_401,4LPG\_1MV\_F\_402,4LPS\_GDP\_A\_302,4LUO\_1DZ\_A\_201,4LUV  
\_1DZ\_A\_202,4LUW\_QJ8\_B\_503,4LUX\_QJ8\_A\_803,4LUX\_QJ8\_B\_803,4LV9\_20J\_A\_601,4LV9\_20J\_A\_60  
2,4LV9\_20J\_B\_601,4LVB\_20N\_A\_601,4LVB\_20N\_B\_601,4LVD\_1EB\_A\_603,4LVD\_1EB\_B\_603,4LW1\_1  
XS\_A\_201,4LW1\_1XS\_A\_202,4LWA\_Q13\_A\_902,4LWB\_QJ8\_A\_902,4LWC\_1XU\_A\_201,4LWP\_SAH\_A\_  
401,4LWP\_SAH\_B\_407,4LXZ\_SHH\_A\_407,4LXZ\_SHH\_B\_408,4LXZ\_SHH\_C\_406,4LY1\_20Y\_B\_408,4L  
Y1\_20Y\_C\_406,4LY9\_1YY\_A\_714,4LY9\_1YY\_B\_716,4LYW\_21Q\_A\_1001,4LZR\_LOC\_A\_201,4M0Y\_M  
0Y\_A\_701,4M0Y\_M0Y\_A\_702,4M0Z\_M0Z\_A\_702,4M12\_1YZ\_A\_701,4M2U\_ETS\_A\_302,4M2W\_ETS\_A\_  
302,4M49\_22Y\_A\_803,4M49\_22Y\_C\_803,4M5G\_YH1\_A\_302,4M5H\_YH2\_A\_302,4M5I\_YH6\_A\_205,4M  
5J\_YH5\_A\_302,4M5K\_YH3\_A\_305,4M5L\_YH4\_A\_306,4M5M\_DX4\_A\_401,4M5N\_YH7\_A\_504,4M5N\_Y  
H7\_B\_204,4M8E\_29V\_A\_500,4M8H\_R4M\_A\_500,4MES\_26G\_A\_203,4MES\_26G\_B\_206,4MHW\_0YN\_B\_  
201,4MJO\_2C1\_A\_401,4MJO\_2C1\_C\_401,4MJO\_2C1\_D\_401,4MJO\_2C1\_E\_401,4MJO\_2C1\_G\_401,4MLX  
\_TM7\_A\_303,4MME\_29Q\_A\_603,4MME\_29Q\_B\_603,4MMM\_BP7\_C\_201,4MNP\_SLB\_A\_401,4MO4\_AC  
P\_B\_500,4MO4\_ACP\_C\_500,4MO4\_ACP\_D\_500,4MP2\_PV1\_A\_501,4MPC\_PV2\_A\_502,4MPE\_PV8\_A\_50  
1,4MPN\_PV0\_A\_501,4MR4\_1K0\_A\_204,4MR6\_1K0\_A\_505,4MRE\_2C9\_A\_202,4MRF\_2CK\_A\_203,4MR  
G\_24W\_A\_201,4MRH\_2CQ\_A\_201,4MSU\_2EU\_B\_701,4MUV\_PCG\_A\_401,4MUV\_PCG\_B\_401,4MXO\_  
DB8\_A\_601,4MXO\_DB8\_B\_601,4MXP\_DB4\_A\_701,4MYD\_164\_A\_301,4MYD\_164\_B\_301,4N4D\_XX8\_  
A\_201,4N4D\_XX8\_B\_201,4N7M\_2GQ\_A\_401,4N7U\_2JA\_A\_501,4N9C\_2ZM\_A\_601,4N9C\_2ZM\_B\_601,4  
N9I\_PCG\_A\_301,4N9I\_PCG\_B\_301,4N9I\_PCG\_D\_301,4NBK\_2J5\_A\_401,4NBL\_2J6\_A\_401,4NBN\_2J7\_B  
\_401,4NG2\_OHN\_A\_201,4NG2\_OHN\_C\_201,4NG2\_OHN\_D\_201,4NJV\_RIT\_A\_500,4NJV\_RIT\_D\_500,4N  
KA\_2K7\_A\_805,4NKA\_2K7\_B\_803,4NKS\_2M2\_A\_801,4NKS\_2M2\_B\_801,4NKT\_2KH\_A\_401,4NKT\_2K  
H\_B\_401,4NKW\_PLO\_C\_601,4NKW\_PLO\_D\_601,4NO4\_LAT\_A\_205,4NO4\_LAT\_B\_202,4NO4\_LAT\_E\_  
203,4NO4\_LAT\_F\_203,4NON\_GDP\_A\_301,4NON\_GDP\_B\_301,4NP2\_2L1\_A\_201,4NP3\_2L2\_A\_201,4NR  
7\_2LO\_A\_1204,4NRA\_2LW\_A\_2006,4NVP\_7CH\_A\_800,4NXU\_ADP\_A\_501,4NXU\_ADP\_B\_501,4NXU\_  
ADP\_C\_501,4NXV\_GDP\_A\_501,4NXV\_GDP\_B\_501,4NXV\_GDP\_C\_501,4NXV\_GDP\_D\_501,4NYF\_4BI\_  
A\_301,4NYT\_PC\_A\_303,4NZ2\_2QJ\_A\_504,4NZ2\_2QJ\_B\_504,4O0J\_LF8\_A\_301,4O2A\_2RR\_B\_504,4O2A

\_2RR\_D\_604,4O33\_TZN\_A\_501,4O3F\_TZN\_A\_501,4O74\_R78\_A\_201,4O74\_R78\_B\_201,4OAG\_ADP\_A\_501,4OAS\_2SW\_E\_201,4OCC\_2TZ\_C\_201,4OCC\_2TZ\_E\_201,4OCJ\_NDG\_A\_401,4OCQ\_A2G\_A\_401,4O CX\_MT1\_L\_301,4OEW\_5IO\_A\_903,4OEX\_5EO\_A\_901,4OGI\_R78\_A\_202,4OGI\_R78\_B\_202,4OGJ\_2TA\_A\_203,4OIC\_A8S\_A\_301,4OIV\_XX9\_A\_501,4OIV\_XX9\_B\_501,4OMJ\_2TX\_A\_310,4OMJ\_2TX\_B\_308,4O MK\_SQL\_B\_305,4OOE\_FOM\_A\_500,4OOE\_FOM\_B\_500,4OOE\_FOM\_C\_500,4OOE\_FOM\_D\_500,4OOF\_FOM\_B\_402,4OQR\_2UO\_A\_502,4OTI\_MII\_A\_1001,4OUJ\_LBT\_B\_401,4OVH\_2VE\_A\_405,4OWK\_NGA\_A\_501,4OWK\_NGA\_B\_501,4OWK\_NGA\_C\_501,4OWK\_NGA\_D\_501,4OWK\_NGA\_E\_501,4OWK\_NGA\_F\_501,4OWK\_NGA\_G\_501,4P5Y\_NGA\_A\_201,4P5Z\_Q7M\_A\_1001,4PB2\_5UD\_A\_501,4PFT\_MAB\_A\_601,4PFT\_MAB\_B\_601,4PFU\_MAB\_A\_602,4PFU\_MAB\_B\_602,4PHU\_2YB\_A\_2401,4PIO\_AVI\_A\_402,4PIO\_AVI\_B\_402,4PIO\_SAH\_A\_401,4PIO\_SAH\_B\_401,4PMM\_31V\_A\_801,4PMP\_31W\_A\_801,4PNU\_2VD\_A\_405,4PNU\_2VD\_B\_404,4PNW\_2VM\_B\_402,4POH\_2VR\_A\_501,4POJ\_2VP\_A\_501,4POP\_2VY\_B\_201,4POV\_2VY\_B\_201,4POW\_OP1\_A\_303,4POW\_OP1\_B\_301,4POX\_2W2\_A\_301,4POX\_2W2\_B\_301,4PP5\_2W0\_A\_500,4PSB\_GA3\_A\_201,4PUJ\_CKR\_A\_407,4PUK\_2WU\_A\_405,4PUL\_2WU\_A\_403,4PUM\_2WU\_A\_404,4PV0\_CG4\_A\_701,4PYX\_V90\_A\_304,4PZH\_V13\_A\_305,4PZV\_J1D\_A\_501,4Q06\_V90\_A\_304,4Q07\_V14\_A\_303,4Q08\_V90\_A\_305,4Q09\_V14\_A\_302,4Q0A\_4OA\_C\_501,4Q0A\_4OA\_C\_502,4Q0K\_GA3\_A\_201,4Q0L\_V14\_A\_302,4Q0L\_V14\_B\_302,4Q0L\_V14\_C\_302,4Q0L\_V14\_D\_302,4Q1Y\_017\_A\_106,4Q26\_NLC\_B\_201,4Q26\_NLC\_G\_202,4Q26\_NLC\_H\_201,4Q3Q\_ABH\_A\_405,4Q3Q\_ABH\_B\_405,4Q3Q\_ABH\_D\_403,4Q3R\_XA2\_A\_407,4Q3R\_XA2\_B\_409,4Q3R\_XA2\_C\_407,4Q3R\_XA2\_D\_404,4Q3S\_X7A\_B\_403,4Q3S\_X7A\_C\_403,4Q3T\_HAR\_A\_405,4Q3T\_HAR\_B\_405,4Q3T\_HAR\_C\_405,4Q3T\_HAR\_D\_401,4Q3U\_NNH\_B\_405,4Q3U\_NNH\_D\_403,4Q4O\_2YM\_A\_406,4Q4R\_SQO\_A\_405,4Q5M\_ROC\_A\_1101,4Q6D\_WW3\_A\_304,4Q6E\_KR5\_A\_305,4Q9M\_2ZW\_A\_301,4Q9M\_2ZW\_B\_301,4Q9O\_2ZW\_A\_301,4Q9O\_2ZW\_B\_301,4QA0\_SHH\_A\_404,4QA0\_SHH\_B\_404,4QA2\_SHH\_A\_404,4QA2\_SHH\_B\_404,4QAC\_KK3\_A\_304,4QAC\_KK3\_B\_303,4QAC\_KK3\_C\_301,4QAC\_KK3\_D\_304,4QAC\_KK3\_E\_302,4QAC\_KK3\_F\_304,4QAC\_KK3\_G\_302,4QAC\_KK3\_H\_303,4QB3\_30M\_A\_201,4QBK\_3NZ\_A\_202,4QD3\_5AE\_A\_201,4QGI\_ROC\_A\_101,4QIJ\_1HA\_A\_401,4QIJ\_1HA\_C\_401,4QIJ\_1HA\_D\_401,4QIJ\_1HA\_F\_401,4QIJ\_1HA\_G\_401,4QIJ\_1HA\_J\_401,4QIJ\_1HA\_L\_401,4QIY\_WWX\_A\_302,4QIY\_WWX\_B\_302,4QIY\_WWX\_C\_302,4QIY\_WWX\_D\_302,4QIZ\_WWX\_A\_304,4QJ0\_WWX\_A\_303,4QJ0\_WWX\_C\_303,4QJ0\_WWX\_D\_305,4QJM\_V1F\_A\_302,4QJO\_V1F\_A\_303,4QJO\_V1F\_B\_304,4QJO\_V1F\_C\_302,4QJO\_V1F\_D\_302,4QJP\_V1F\_A\_303,4QJP\_V1F\_B\_303,4QJR\_PIZ\_A\_501,4QJW\_WWO\_A\_302,4QJW\_WWO\_B\_302,4QJW\_WWO\_C\_302,4QJX\_WWO\_A\_304,4QMN\_DB8\_A\_401,4QMZ\_B49\_A\_401,4QNB\_1B0\_A\_301,4QO7\_36V\_A\_803,4QO7\_36V\_C\_803,4QO8\_36U\_A\_804,4QO8\_36U\_C\_804,4QO8\_36U\_D\_803,4QOH\_STL\_A\_302,4QOH\_STL\_B\_302,4QOJ\_STL\_A\_302,4QOJ\_STL\_B\_302,4QP2\_36R\_A\_401,4QPL\_V3L\_A\_201,4QPL\_V3L\_C\_201,4QS7\_BGC\_A\_501,4QS9\_BGC\_A\_501,4QSA\_EWW\_A\_302,4QSB\_EWY\_A\_302,4QSJ\_EWW\_A\_302,4QTA\_38Z\_A\_411,4QTB\_38Z\_A\_418,4QTB\_38Z\_B\_412,4QTC\_38Z\_A\_804,4QTE\_390\_A\_430,4QTL\_WWO\_A\_304,4QXO\_1YE\_A\_401,4QXQ\_1YE\_B\_401,4QXR\_1YE\_A\_401,4QXV\_LU2\_A\_201,4QXV\_LU2\_B\_201,4QYA\_LU2\_A\_201,4QYN\_RTL\_B\_201,4QYY\_3G7\_A\_401,4QZS\_JQ1\_A\_201,4QZT\_RTL\_A\_201,4QZT\_RTL\_C\_201,4QZU\_RTL\_A\_201,4QZU\_RTL\_B\_201,4QZU\_RTL\_C\_201,4R07\_URI\_A\_901,4R07\_URI\_B\_901,4R07\_URI\_C\_901,4R07\_URI\_D\_901,4R08\_URI\_A\_901,4R08\_URI\_B\_901,4R08\_URI\_C\_902,4R08\_URI\_D\_901,4R0A\_URI\_A\_901,4R43\_GDP\_A\_701,4R57\_ACO\_A\_201,4R57\_ACO\_B\_201,4R57\_ACO\_C\_201,4R57\_ACO\_D\_201,4R57\_ACO\_E\_201,4R57\_ACO\_G\_201,4R57\_ACO\_H\_201,4R57\_ACO\_I\_201,4R57\_ACO\_J\_201,4R57\_ACO\_K\_201,4R5E\_AO3\_A\_403,4R6W\_SAH\_A\_302,4R6W\_SAH\_B\_302,4R73\_G6P\_A\_401,4R73\_G6P\_B\_401,4R73\_M6P\_A\_402,4R73\_M6P\_B\_402,4R74\_F6P\_A\_401,4R74\_F6P\_B\_401,4R74\_F6P\_C\_401,4R74\_F6P\_D\_401,4R75\_S7P\_A\_401,4RA1\_ALX\_A\_601,4RA1\_BNX\_A\_602,4RD0\_GDP\_A\_501,4RD0\_GDP\_A\_503,4RD6\_GDP\_A\_501,4RFR\_RHN\_B\_301,4RFW\_3RB\_A\_500,4RG2\_3OO\_A\_1701,4RJD\_TFP\_A\_203,4RJD\_TFP\_A\_204,4RJD\_TFP\_B\_203,4RJD\_TFP\_B\_204,4RLT\_FSE\_A\_201,4RMD\_3SW\_A\_500,4RME\_3T2\_A\_500,4RP8\_ASC\_A\_501,4RP8\_ASC\_C\_501,4RP9\_ASC\_A\_501,4RPN\_PCI\_A\_401,4RPN\_PCI\_B\_402,4RPN\_PCI\_C\_401,4RPN\_PCI\_C\_402,4RPN\_PCI\_D\_401,4RPN\_PCI\_D\_402,4RPO\_T6C\_A\_401,4RPO\_T6C\_B\_401,4RPO\_T6C\_D\_402,4RQL\_SNE\_B\_502,4RQU\_NAD\_B\_403,4RR6\_A3S\_A\_500,4RR8\_A3S\_A\_201,4RRA\_A3T\_A\_201,4RRB\_A3T\_A\_500,4RRC\_A3T\_A\_500,4RRF\_A3S\_A\_501,4RRF\_A3S\_B\_201,4RRF\_A3S\_C\_201,4RRF\_A3S\_D\_201,4RRF\_A3S\_E\_201,4RRF\_A3S\_F\_201,4RRG\_A3T\_C\_201,4RRT\_3V4\_A\_502,4RRT\_3V4\_B\_502,4RSK\_U3P\_A\_125,4RT0\_C2E\_A\_202,4RT0\_C2E\_B\_201,4RT0\_C2E\_B\_202,4RT0\_C2E\_C\_201,4RT0\_C2E\_C\_202,4RT1\_C2E\_A\_201,4RT1\_C2E\_C\_201,4RUS\_NAG\_C\_304,4RUS\_NAG\_C\_305,4RUS\_NDG\_A\_304,4RUS\_NDG\_B\_304,4RUS\_NDG\_B\_305,4RUS\_NDG\_D\_304,4RUS\_NDG\_F\_304,4RUS\_NDG\_F\_305,4RVJ\_478\_B\_101,4RVJ\_478\_D\_101,4RWJ\_66T\_A\_801,4RWJ\_66T\_B\_801,4RWL\_3ZC\_B\_801,4S1B\_2BA\_A\_803,4TMK\_T5A\_A\_214,4TMW\_GTP\_A\_901,4TMW\_GTP\_B\_901,4TMZ\_GSP\_A\_901,4TMZ\_GSP\_B\_901,4TPW\_33R\_A\_302,4TPW\_MGP\_A\_301,4TPW\_MGP\_B\_301,4TQ3\_GPP\_C\_401,4TQK\_NAG\_A\_501,4TQK\_NAG\_A\_502,4TQK\_NAG\_A\_503,4TQK\_NAG\_A\_504,4TQK\_NAG\_A\_505,4TQK\_NAG\_B\_501,4TQK\_NAG\_B\_503,4TQK\_NAG\_B\_504,4TQK\_NAG\_B\_505,4TQN\_UL4\_A\_1201,4TSX\_LF0\_A\_301,4TTE\_36Z\_A\_1204,4TU4\_37N\_A\_1204,4TVJ\_09L\_A\_601,4TVJ\_09L\_B\_601,4TWN\_B96\_A\_1001,4TXC\_38G\_A\_301,4TZ2\_39R\_A\_1205,4TZ8\_39U\_A\_1204,4U0E\_1B0\_A\_302,4U0S\_ADP\_A\_501,4U0S\_ADP\_B\_501,4U0W\_16G\_B\_301,

4U0X\_ZXM\_A\_401,4U0X\_ZXM\_B\_401,4U0X\_ZXM\_C\_401,4U0X\_ZXM\_D\_401,4U43\_3D8\_A\_401,4U5J\_RXT\_B\_601,4U5N\_3D4\_A\_501,4U5O\_3D5\_A\_501,4U5S\_3D0\_A\_501,4U5U\_3D2\_A\_501,4U5U\_3D2\_A\_502,4U5V\_RH2\_A\_501,4U5V\_RH2\_A\_502,4U6Q\_3CR\_A\_402,4U7F\_K25\_B\_304,4U7G\_K17\_A\_303,4U7H\_K25\_B\_301,4U7H\_K25\_B\_304,4U7W\_NDP\_A\_1601,4U7W\_NDP\_B\_1601,4UA8\_MLR\_A\_501,4UAC\_AC\_R\_A\_501,4UAP\_NGA\_A\_201,4UAP\_NGA\_B\_201,4UBS\_DIF\_A\_502,4UBS\_DIF\_A\_503,4UCC\_ZKW\_A\_301,4UCC\_ZKW\_B\_301,4UCM\_X6W\_A\_1423,4UCP\_9X3\_A\_1422,4UD9\_FQI\_H\_1257,4UDC\_DEX\_A\_1778,4UDW\_N6L\_H\_1249,4UE7\_MRZ\_H\_1258,4UEH\_BEN\_H\_1249,4UG5\_XFK\_A\_904,4UG6\_XFJ\_A\_904,4UG7\_1EV\_A\_904,4UG8\_HW1\_A\_904,4UG9\_1EW\_A\_904,4UGA\_Q05\_A\_904,4UGG\_S5D\_A\_904,4UGH\_4V4\_A\_1367,4UGI\_SKO\_A\_904,4UGM\_1QE\_A\_804,4UGN\_H49\_A\_904,4UGR\_6E5\_A\_904,4UGS\_H36\_A\_904,4UHI\_VFV\_A\_580,4UHI\_VFV\_B\_580,4UHI\_VFV\_C\_580,4UHI\_VFV\_D\_580,4UHI\_VFV\_D\_600,4UHL\_VFV\_A\_580,4UHL\_VFV\_A\_600,4UHL\_VFV\_B\_600,4UHL\_VFV\_C\_580,4UHL\_VFV\_C\_600,4UHL\_VFV\_D\_580,4UHL\_VFV\_D\_600,4UHL\_VFV\_E\_580,4UHL\_VFV\_E\_600,4UHL\_VFV\_F\_580,4UHL\_VFV\_G\_580,4UHL\_VFV\_H\_600,4UIN\_QI9\_H\_1226,4UNP\_TXW\_A\_1211,4UP5\_94W\_A\_1385,4UQH\_25S\_A\_1485,4UR9\_BK9\_A\_1717,4URX\_FK1\_S\_2046,4URX\_HXY\_S\_2047,4URY\_RV1\_R\_1167,4USW\_ATP\_A\_1471,4UWD\_UN9\_A\_601,4UXQ\_OLI\_A\_1752,4UYF\_73B\_A\_1191,4UYF\_73B\_B\_1185,4UYF\_73B\_C\_1183,4UYG\_73B\_A\_1456,4UYG\_73B\_B\_1456,4UYG\_73B\_C\_1456,4UYG\_73B\_D\_1456,4UYG\_73B\_E\_1456,4UYW\_H1S\_A\_1453,4V04\_OLI\_A\_1772,4V04\_OLI\_B\_1771,4W52\_BNZ\_A\_200,4W53\_MBN\_A\_200,4W55\_3H0\_A\_200,4W57\_N4B\_A\_200,4W6Z\_8ID\_A\_403,4W6Z\_8ID\_C\_403,4W6Z ETF\_B\_404,4W6Z ETF\_C\_404,4W6Z ETF\_D\_404,4W97\_UCA\_A\_301,4W9C\_3JG\_C\_301,4W9C\_3JG\_F\_301,4W9C\_3JG\_I\_301,4W9C\_3JG\_L\_301,4W9D\_3JK\_C\_301,4W9D\_3JK\_F\_301,4W9D\_3JK\_I\_301,4W9F\_3JU\_C\_301,4W9F\_3JU\_I\_301,4W9F\_3JU\_L\_301,4W9H\_3JF\_C\_301,4W9H\_3JF\_I\_301,4W9I\_3JS\_C\_301,4W9I\_3JS\_F\_301,4W9I\_3JS\_I\_301,4W9I\_3JS\_L\_301,4W9J\_3JH\_C\_301,4W9J\_3JH\_F\_301,4W9J\_3JH\_I\_301,4W9J\_3JH\_L\_301,4W9K\_3JO\_F\_301,4W9K\_3JO\_L\_301,4W9L\_3JJ\_C\_301,4W9L\_3JJ\_F\_301,4W9L\_3JJ\_I\_301,4W9L\_3JJ\_L\_301,4WF2\_B\_TX\_A\_501,4WF5\_WF4\_A\_202,4WK1\_2BA\_A\_201,4WKN\_TDI\_A\_301,4WMU\_19H\_A\_402,4WMX\_3R7\_A\_402,4WMY\_3S6\_A\_404,4WMY\_3S6\_B\_404,4WMZ\_TPF\_A\_602,4WO0\_AGI\_A\_201,4WOE\_ADP\_A\_801,4WOP\_CTP\_C\_301,4WOP\_CTP\_D\_301,4WR7\_3TV\_A\_302,4WR7\_3TV\_B\_302,4WR7\_ACT\_A\_304,4WR7\_ACT\_B\_304,4WT2\_3UD\_A\_201,4WUP\_ACT\_A\_303,4WW6\_3TV\_A\_306,4WW6\_3TV\_A\_307,4WW8\_VD9\_A\_305,4WW8\_VD9\_B\_308,4WW8\_VD9\_C\_304,4WYA\_3VQ\_B\_501,4WYA\_3VQ\_D\_501,4WYC\_3VS\_B\_502,4WYD\_3VR\_A\_502,4WYD\_3VR\_B\_502,4WYE\_3VW\_A\_502,4WYE\_3VW\_B\_501,4WYF\_3VX\_A\_501,4WYG\_3W1\_A\_503,4WYG\_3W1\_B\_503,4WYP\_AMP\_B\_401,4WYZ\_U3P\_A\_401,4WYZ\_U3P\_B\_401,4WZ6\_ATP\_A\_701,4X1G\_3WF\_A\_501,4X21\_3WH\_A\_501,4X21\_3WH\_B\_501,4X3T\_45E\_A\_101,4X3T\_45E\_B\_101,4X3T\_45E\_C\_101,4X3T\_45E\_D\_101,4X3T\_45E\_E\_101,4X50\_3X8\_A\_301,4X5R\_3XO\_B\_301,4X60\_3XV\_A\_702,4X8O\_AP5\_A\_301,4X8O\_AP5\_B\_301,4XJO\_41O\_A\_502,4XJO\_41O\_B\_502,4XJP\_41N\_A\_502,4XJP\_41N\_B\_502,4XLI\_1N1\_A\_601,4XLI\_1N1\_B\_600,4XO8\_KGM\_A\_501,4XOC\_KGM\_A\_501,4XOC\_KGM\_B\_501,4XOO\_FMN\_B\_501,4XOO\_FMN\_C\_501,4XOO\_FMN\_D\_501,4XQA\_423\_B\_401,4XQ\_B\_425\_A\_401,4XRQ\_1B0\_A\_301,4XT2\_43L\_A\_401,4XT2\_43L\_C\_401,4XTV\_44K\_A\_301,4XTV\_44K\_B\_301,4XTX\_590\_A\_301,4XTX\_590\_B\_300,4XTY\_44L\_A\_301,4XTZ\_594\_B\_301,4XU0\_44N\_A\_301,4XU1\_44O\_A\_301,4XU1\_44O\_B\_301,4XU2\_44Q\_B\_300,4XU3\_44R\_B\_300,4XV4\_25T\_A\_303,4XX9\_RF4\_A\_402,4XXH\_T6P\_A\_401,4XXH\_T6P\_B\_401,4XY9\_43U\_A\_202,4XYA\_43S\_A\_201,4XZ6\_TMO\_A\_401,4XZ6\_TMO\_B\_401,4XZH\_48I\_A\_402,4XZH\_48I\_B\_402,4XZI\_F49\_A\_402,4Y24\_TD2\_B\_201,4Y38\_OA9\_A\_411,4Y3J\_HIC\_A\_415,4Y3Y\_DCL\_A\_412,4Y4J\_LNR\_A\_412,4Y4V\_DAL\_A\_401,4Y4V\_DAL\_A\_402,4Y4V\_DAL\_B\_402,4Y59\_T21\_A\_200,4Y59\_T21\_B\_200,4Y59\_T21\_C\_200,4Y59\_T21\_D\_200,4Y5D\_MT6\_B\_200,4Y5D\_MT6\_D\_200,4Y8D\_49J\_A\_401,4Y8D\_49J\_B\_401,4Y93\_746\_A\_702,4Y94\_IHP\_A\_501,4Y94\_IHP\_A\_502,4Y94\_IHP\_B\_201,4Y94\_IHP\_C\_201,4Y94\_IHP\_D\_201,4Y94\_IHP\_D\_202,4Y95\_746\_A\_701,4Y95\_746\_B\_701,4Y95\_746\_C\_1001,4Y95\_746\_D\_701,4YBK\_4B7\_A\_601,4YCA\_NDP\_A\_800,4YCA\_NDP\_B\_800,4YEE\_4CQ\_A\_203,4YEE\_4CQ\_B\_203,4YEE\_4CQ\_C\_203,4YEE\_4CQ\_E\_202,4YEE\_4CQ\_F\_202,4YEE\_4CQ\_I\_203,4YEE\_4CQ\_K\_202,4YEE\_4CQ\_L\_202,4YEE\_4CQ\_M\_202,4YEE\_4CQ\_N\_203,4YEE\_4CQ\_O\_201,4YEE\_4CQ\_P\_202,4YEE\_4CQ\_Q\_201,4YEE\_4CQ\_R\_201,4YJ1\_ADP\_A\_701,4YM3\_LAT\_B\_401,4YM3\_LAT\_C\_401,4YM3\_LAT\_D\_401,4YMG\_SAM\_A\_1001,4YMG\_SAM\_B\_1001,4YMH\_SAH\_A\_1001,4YMH\_SAH\_C\_1001,4YMH\_SAH\_D\_1001,4YRD\_3IT\_B\_402,4YSL\_GSH\_A\_302,4YSL\_GSH\_B\_302,4YUX\_4JT\_A\_502,4YUX\_4JT\_B\_502,4YV5\_SVR\_A\_205,4YV5\_SVR\_B\_207,4YVB\_BTN\_A\_5001,4YVB\_BTN\_B\_201,4YVB\_BTN\_C\_201,4YVB\_BTN\_D\_201,4YW7\_4J0\_C\_201,4YW7\_4J0\_I\_202,4YWA\_4J9\_A\_202,4YWA\_4J9\_C\_201,4YWP\_SUC\_A\_302,4YX4\_FB2\_A\_303,4YXI\_4J8\_A\_303,4YXI\_4J8\_A\_304,4YXO\_4JC\_A\_304,4YXO\_4JC\_A\_305,4YXU\_4JE\_A\_304,4YXU\_4JE\_A\_305,4YYT\_S2O\_A\_305,4Z1J\_4KC\_A\_302,4Z69\_DIF\_A\_1007,4Z69\_DIF\_A\_1008,4Z69\_DIF\_I\_1006,4Z6H\_4L2\_A\_201,4Z6H\_4L2\_B\_201,4Z93\_4LD\_A\_501,4ZAF\_4LR\_A\_301,4ZAG\_4LR\_A\_301,4ZAL\_4LR\_A\_301,4ZAN\_4LR\_A\_301,4ZB6\_GDS\_B\_300,4ZB6\_GDS\_C\_300,4ZB6\_GDS\_D\_300,4ZB8\_GDS\_A\_300,4ZB9\_GDS\_A\_300,4ZB9\_GDS\_D\_300,4ZBA\_GDS\_A\_300,4ZBA\_GDS\_B\_300,4ZBA\_GDS\_C\_300,4ZBA\_GDS\_D\_301,4ZBD\_GSH\_A\_300,4ZBD\_GSH\_A\_301,4ZBD\_GSH\_B\_300,4ZBD\_GSH\_B\_301,4ZCC\_NAI\_A\_402,4ZCC\_NAI\_B\_402,4ZCC\_NAI\_C\_402,4ZCC\_NAI\_D\_402,4ZDY\_1YN\_A\_602,4ZDZ\_TPF\_A\_602,4ZE0\_VOR\_A\_602,4ZE1\_X2N\_A\_602,4ZE2\_1YN\_A\_602,4Z

E3\_TPF\_A\_602,4ZE6\_011\_A\_416,4ZFI\_4NJ\_A\_201,4ZFI\_4NJ\_B\_201,4ZFI\_4NJ\_C\_201,4ZFI\_4NJ\_D\_201,4ZGK\_4NX\_A\_201,4ZHF\_4OL\_A\_202,4ZHF\_4OL\_B\_202,4ZHF\_4OL\_C\_202,4ZHF\_4OL\_D\_202,4ZHF\_4OL\_E\_202,4ZHG\_4OL\_A\_202,4ZHG\_4OL\_B\_202,4ZHG\_4OL\_D\_202,4ZIJ\_SFQ\_A\_201,4ZJI\_4OQ\_B\_601,4ZJI\_4OQ\_C\_601,4ZJI\_4OQ\_D\_601,4ZJJ\_4OR\_A\_601,4ZJJ\_4OR\_B\_601,4ZJJ\_4OR\_C\_601,4ZJJ\_4OR\_D\_601,4ZLA\_BES\_A\_505,4ZLA\_BES\_B\_505,4ZLA\_BES\_C\_505,4ZLA\_BES\_D\_505,4ZLA\_BES\_F\_505,4ZME\_ADN\_A\_1002,4ZMF\_AMP\_A\_901,4ZMF\_AMP\_B\_901,4ZOG\_VX6\_B\_601,4ZOW\_CLM\_A\_500,4ZPG\_4QF\_A\_501,4ZS4\_ATP\_B\_903,4ZS9\_RAF\_A\_501,4ZS9\_RAF\_B\_501,4ZSH\_4XW\_A\_501,4ZVL\_AO\_A\_303,4ZVL\_AO\_B\_301,4ZVM\_DM2\_A\_303,4ZVM\_DM2\_B\_303,4ZVN\_AO\_A\_303,4ZYF\_4T4\_A\_201,4ZZX\_FSU\_A\_1584,4ZZY\_D7N\_A\_1584,4ZZZ\_FSU\_A\_2019,4ZZZ\_FSU\_B\_2015,5A14\_LQ5\_A\_1297,5A4C\_XOJ\_A\_1774,5A4C\_XOJ\_B\_1772,5A4K\_FAD\_A\_1274,5A4K\_FAD\_B\_1274,5A4K\_FAD\_C\_1274,5A4K\_FAD\_D\_1274,5A5D\_5LC\_A\_500,5A5Q\_6XC\_A\_2111,5A5V\_PXJ\_A\_500,5A7B\_KMN\_B\_1001,5A81\_78J\_A\_2111,5A82\_YEJ\_A\_2112,5A83\_YD3\_A\_1112,5A8E\_XTK\_A\_501,5AAA\_VGH\_A\_9000,5AAC\_VGH\_A\_9000,5AAN\_XOC\_A\_1189,5AB6\_CAA\_A\_1409,5AB6\_CAA\_B\_1409,5AB6\_CAA\_C\_1409,5AB6\_CAA\_D\_1409,5AB6\_CAA\_E\_1409,5AB6\_CAA\_F\_1409,5AB7\_MLC\_A\_1410,5AB7\_MLC\_B\_1410,5AB7\_MLC\_C\_1413,5AB9\_92O\_A\_1292,5AB9\_92O\_B\_1292,5AB9\_92O\_C\_1293,5ABA\_UL7\_A\_1291,5ABA\_UL7\_B\_1291,5ABP\_GAL\_A\_308,5ACW\_RHU\_A\_1298,5ACW\_RHU\_B\_1299,5ACW\_RHU\_C\_1299,5ACW\_RHU\_D\_1299,5ACX\_WL3\_A\_1298,5ACX\_WL3\_B\_1298,5ACY\_9S3\_A\_1172,5ACY\_9S3\_B\_1169,5AD1\_8LC\_A\_500,5AD2\_ETU\_A\_1169,5AD3\_K6K\_B\_1169,5ADB\_XEB\_B\_800,5ADW\_EHS\_A\_312,5ADW\_EHS\_B\_312,5AF9\_SJR\_H\_1250,5AFV\_JH5\_A\_1463,5AFV\_JH5\_B\_1460,5AFZ\_UEH\_H\_1248,5AHW\_CMP\_A\_1148,5AHW\_CMP\_B\_1148,5AHW\_CMP\_C\_1148,5AHW\_CMP\_D\_1148,5AHW\_CMP\_E\_1148,5AHW\_CMP\_F\_1148,5AII\_EQU\_A\_1128,5AIP\_4HP\_B\_1146,5AIS\_CWC\_A\_1200,5AIS\_CWC\_B\_1200,5AIS\_CWC\_C\_1200,5AIS\_CWC\_D\_1200,5AIV\_M1W\_B\_1200,5AIV\_M1W\_C\_1200,5AIV\_M1W\_D\_1200,5AIX\_KRX\_B\_1201,5AIX\_KRX\_C\_1201,5AJQ\_DB8\_A\_800,5AJQ\_DB8\_B\_800,5AM6\_38O\_A\_1766,5AM7\_38O\_A\_1000,5AM7\_38O\_B\_1000,5AOI\_RZH\_B\_1292,5AOJ\_Y0V\_A\_1291,5AOJ\_Y0V\_B\_1292,5AOL\_UFV\_A\_1293,5AOM\_FY8\_A\_1291,5AOM\_FY8\_B\_1290,5AQF\_ADN\_A\_1382,5AQF\_ADN\_C\_1382,5AQZ\_SGV\_A\_1389,5AR0\_GB8\_A\_1384,5AUT\_2AN\_A\_301,5AVF\_TAU\_A\_501,5AVF\_TAU\_B\_501,5B25\_4QJ\_B\_603,5B25\_4QJ\_C\_603,5B25\_4QJ\_D\_603,5B2D\_SLT\_B\_606,5B5F\_6F3\_A\_200,5B5F\_6F3\_C\_200,5B5F\_6F3\_D\_200,5B5G\_6FX\_C\_202,5B5G\_6FX\_D\_202,5BIR\_2GP\_A\_105,5BIR\_2GP\_B\_306,5BN9\_ADP\_A\_401,5BOJ\_4TX\_A\_201,5BOJ\_4TX\_B\_201,5BQX\_4UR\_A\_401,5BRV\_9TH\_A\_302,5BT3\_2LO\_A\_1201,5BT4\_2LO\_C\_201,5BTX\_CMP\_A\_201,5BTX\_CMP\_B\_201,5BV3\_M7G\_A\_401,5BV3\_M7G\_C\_401,5BV6\_35G\_A\_501,5BVB\_DOG\_C\_201,5BVV\_1N1\_A\_1009,5BW4\_SAM\_A\_301,5BW4\_SAM\_B\_301,5BXJ\_NPO\_A\_201,5BXV\_MGP\_A\_301,5BXV\_MGP\_C\_301,5C03\_AGS\_A\_901,5C03\_AGS\_B\_901,5C3P\_AKG\_A\_402,5C3P\_AKG\_B\_402,5C3P\_AKG\_C\_402,5C3P\_AKG\_D\_402,5C3Q\_AKG\_A\_402,5C3Q\_AKG\_B\_402,5C3Q\_AKG\_C\_402,5C3Q\_TDR\_A\_403,5C3R\_AKG\_A\_402,5C3R\_AKG\_B\_402,5C3R\_AKG\_C\_402,5C3R\_AKG\_D\_402,5C3R\_HMU\_B\_403,5C3R\_HMU\_C\_403,5C3R\_HMU\_D\_403,5C3S\_AKG\_A\_402,5C3S\_AKG\_B\_402,5C3S\_AKG\_C\_402,5C3S\_AKG\_D\_402,5C3S\_FYU\_B\_404,5C3S\_FYU\_C\_404,5C3S\_FYU\_D\_404,5C4L\_SIS\_B\_401,5C5A\_NUT\_A\_201,5C5A\_NUT\_B\_201,5C5T\_AKG\_A\_301,5C5T\_AKG\_B\_301,5C6C\_CMP\_B\_304,5C79\_PBU\_A\_800,5C79\_PBU\_B\_502,5C79\_PBU\_C\_503,5C85\_4YO\_A\_802,5C8W\_PCG\_B\_303,5C8W\_PCG\_C\_302,5C8W\_PCG\_D\_302,5C8W\_PCG\_E\_302,5C8W\_PCG\_F\_302,5CBR\_4ZK\_A\_301,5CBS\_E42\_A\_301,5CBS\_E42\_B\_301,5CBS\_E42\_C\_301,5CBS\_E42\_D\_301,5CC2\_CKA\_A\_302,5CC2\_CKA\_B\_303,5CF8\_50V\_A\_4000,5CF8\_50V\_B\_4000,5CFL\_C2E\_A\_401,5CFQ\_1SY\_B\_401,5CFW\_53W\_A\_201,5CGP\_53W\_A\_4000,5CHQ\_NPO\_A\_204,5CHQ\_NPO\_B\_204,5CJH\_522\_A\_801,5CJH\_522\_B\_801,5CPL\_536\_A\_401,5CPL\_536\_B\_401,5CPR\_539\_B\_403,5CS6\_K82\_A\_404,5CS6\_K82\_B\_405,5CS6\_K82\_C\_406,5CS6\_K82\_D\_407,5CSD\_ACD\_A\_201,5CSD\_ACD\_B\_202,5CSD\_ACD\_C\_201,5CSH\_54E\_A\_401,5CSH\_54E\_B\_402,5CSH\_54E\_C\_403,5CSH\_54E\_D\_404,5CSP\_54G\_A\_401,5CU3\_54S\_A\_404,5CU3\_54S\_B\_403,5CU4\_54S\_A\_404,5CYV\_WCA\_A\_201,5CYV\_WCA\_B\_202,5D0R\_B1T\_A\_501,5D24\_L26\_A\_201,5D26\_L28\_A\_201,5D3H\_57G\_A\_201,5D3L\_57F\_A\_201,5D3P\_57E\_A\_201,5D3S\_579\_A\_201,5D3T\_56Y\_A\_201,5D3X\_4IP\_A\_501,5D3Y\_4IP\_A\_501,5D3Y\_4IP\_B\_501,5D6J\_ATP\_A\_702,5DAB\_58W\_A\_612,5DFC\_EAM\_A\_503,5DLX\_5D2\_A\_201,5DLZ\_5D1\_A\_201,5DN3\_5DN\_A\_402,5DN9\_NAD\_B\_501,5DNU\_KKN\_A\_301,5DOH\_5DU\_A\_304,5DQ8\_FLF\_A\_501,5DQ8\_FLF\_B\_501,5DQ8\_FLF\_C\_502,5DQF\_CZE\_A\_613,5DQF\_LCR\_A\_612,5DR9\_SKE\_A\_401,5DRB\_5FJ\_A\_501,5DRS\_5EF\_A\_305,5DT0\_SKE\_A\_401,5DTW\_5F9\_A\_301,5DU4\_5FF\_A\_301,5DU8\_5FK\_A\_301,5DU8\_5FK\_B\_301,5DU8\_5FK\_C\_301,5DUS\_APR\_A\_201,5DUV\_LAT\_A\_201,5DUV\_LAT\_B\_201,5DUV\_LAT\_C\_201,5DUV\_LAT\_D\_201,5DUW\_5GO\_A\_201,5DUW\_5GO\_B\_201,5DUW\_5GO\_D\_201,5DVI\_BGC\_B\_501,5DW1\_5GD\_B\_500,5DW1\_5GD\_C\_501,5DW2\_5GD\_A\_201,5DYZ\_140\_C\_502,5E1S\_5JA\_A\_1301,5E2L\_DPN\_A\_507,5E2L\_DPN\_B\_509,5E2M\_ACT\_A\_303,5E2M\_V14\_A\_302,5E2M\_V14\_B\_302,5E2N\_V14\_A\_307,5E2N\_V14\_B\_306,5E3D\_5JL\_A\_801,5E58\_CPZ\_A\_502,5E58\_CPZ\_B\_502,5E58\_CPZ\_C\_502,5E58\_CPZ\_D\_502,5E58\_CPZ\_E\_503,5E58\_CPZ\_F\_502,5E58\_CPZ\_G\_503,5E5G\_DTR\_B\_506,5E5G\_DTR\_C\_507,5E6H\_AKG\_A\_602,5E70\_RCD\_A\_801,5E70\_RCD\_B\_801,5E70\_RCD\_C\_801,5E70\_RCD\_D\_802,5E73\_UO1\_A\_2001,5E74\_5KH\_A\_2001,5E7N\_5KR\_A\_201,5E88\_5KT\_A\_302,5E89\_TD2\_A\_302,5E95\_GDP\_A\_201,5EA4\_5NM\_F\_607,5EB3\_UEG\_A\_202,5ECT\_DUP\_A\_201,5EDD\_D

UP\_A\_202,5EDL\_VIB\_A\_201,5EDT\_5MK\_A\_402,5EE7\_5MV\_A\_1201,5EFC\_GTP\_A\_501,5EH5\_XCZ\_A\_303,5EH8\_5O6\_A\_303,5EHR\_5OD\_A\_601,5EHR\_5OD\_B\_601,5EHV\_5ON\_A\_301,5EHW\_5OO\_A\_303,5E I3\_5O8\_A\_301,5EJL\_C2E\_A\_301,5EJL\_C2E\_A\_302,5EKH\_5RD\_A\_303,5EKJ\_TG4\_A\_303,5EKM\_TG5\_A \_304,5EN3\_7LU\_A\_201,5EN3\_7LU\_B\_201,5EPR\_5QY\_A\_801,5EPS\_5QX\_A\_801,5EQ1\_BEA\_A\_801,5ER G\_SAM\_B\_401,5ERR\_ADP\_A\_801,5ERS\_AMP\_A\_801,5ETB\_5RO\_A\_801,5ETJ\_IM5\_A\_301,5ETJ\_IM5\_ B\_301,5ETJ\_IM5\_C\_301,5ETJ\_IM5\_D\_301,5ETJ\_IM5\_E\_301,5ETJ\_IM5\_F\_302,5ETL\_5RV\_A\_206,5ETL\_ 5RV\_B\_204,5ETL\_5RV\_C\_205,5ETL\_5RV\_D\_204,5ETM\_5RW\_A\_201,5ETN\_5RX\_A\_206,5ETO\_5RY\_A \_201,5ETQ\_YH2\_A\_204,5ETQ\_YH2\_B\_204,5ETR\_5RW\_A\_202,5ETS\_5RX\_A\_202,5ETS\_5RX\_B\_202,5E TT\_5RY\_A\_202,5ETT\_5RY\_B\_202,5ETV\_5RZ\_A\_202,5EU1\_5SW\_A\_201,5EU1\_5SW\_B\_201,5EVZ\_ADP \_A\_503,5EVZ\_ADP\_B\_503,5EWH\_5SG\_A\_801,5EWK\_P34\_A\_301,5EWY\_5TQ\_A\_301,5EXW\_7DT\_A\_50 1,5EXW\_7DT\_B\_501,5EY4\_DTP\_A\_501,5EY4\_DTP\_B\_501,5EYR\_5T0\_A\_301,5EZG\_5T4\_A\_301,5EZG\_ 5T4\_A\_302,5EZH\_841\_A\_301,5EZH\_841\_A\_302,5F0F\_5TD\_A\_301,5F1H\_5U6\_A\_201,5F1H\_5U6\_B\_201, 5F1J\_5TO\_A\_301,5F1J\_5TO\_A\_302,5F1R\_42O\_B\_301,5F1X\_ATP\_A\_501,5F1X\_ATP\_B\_501,5F25\_5TU\_ A\_201,5F25\_5TU\_B\_201,5F2P\_5TY\_A\_201,5F2P\_5TY\_B\_201,5F2R\_ACP\_A\_501,5F2R\_ACP\_B\_501,5F3T \_5UH\_A\_1003,5F41\_5V6\_A\_1003,5F5Z\_5VY\_A\_201,5F61\_5W0\_A\_203,5F61\_5W0\_B\_208,5F63\_5W2\_A\_ 201,5F74\_AMP\_A\_301,5F8W\_GAL\_A\_201,5F8W\_GLA\_A\_202,5F8W\_GLA\_A\_203,5F8W\_GLA\_B\_201,5F 8W\_GLA\_B\_202,5F8W\_GLA\_B\_203,5F8Y\_X6X\_A\_202,5F8Y\_X6X\_A\_203,5F8Y\_X6X\_B\_201,5F8Y\_X6 X\_B\_202,5FB7\_ACD\_A\_201,5FB7\_ACD\_A\_202,5FB7\_ACD\_B\_201,5FB7\_ACD\_B\_202,5FB7\_ACD\_C\_20 1,5FB7\_ACD\_C\_202,5FB7\_ACD\_D\_301,5FBI\_5WD\_A\_302,5FCK\_5WC\_A\_301,5FDZ\_5X0\_A\_901,5FDZ\_ 5X0\_B\_903,5FE6\_5WZ\_A\_909,5FE9\_5WS\_B\_901,5FG5\_5XF\_A\_801,5FH7\_5XL\_A\_803,5FH7\_5XL\_B\_80 1,5FH8\_5XK\_A\_801,5FH8\_5XK\_B\_801,5FH8\_5XK\_C\_801,5FH8\_5XK\_D\_801,5FJN\_BE2\_A\_1476,5FJN\_ BE2\_B\_1476,5FLP\_6J5\_A\_1264,5FLP\_6J5\_A\_1265,5FLQ\_IO2\_A\_1264,5FLR\_XCZ\_A\_1266,5FLS\_6ZX\_A \_1263,5FLT\_VJJ\_A\_1264,5FNC\_IEE\_A\_1225,5FND\_IQ5\_A\_1225,5FNF\_TQL\_A\_1226,5FNG\_YIE\_A\_126 3,5FNI\_YIH\_A\_1265,5FNJ\_CL\_A\_1266,5FNJ\_YI6\_A\_1268,5FNK\_5OO\_A\_1267,5FNL\_5ON\_A\_1264,5FN M\_5O6\_A\_1262,5FNS\_XYY\_A\_1614,5FNT\_OPL\_A\_1615,5FNU\_L6I\_A\_1615,5FOG\_VRT\_A\_1542,5FOG\_ VRT\_B\_1542,5FOG\_VRT\_D\_1542,5FOI\_MY8\_A\_414,5FOI\_MY8\_B\_414,5FOL\_SO8\_A\_1544,5FOM\_A2H \_A\_1542,5FPP\_HI6\_A\_1552,5FQD\_LVY\_B\_1438,5FQD\_LVY\_E\_1438,5FQK\_6NT\_A\_301,5FRY\_ERH\_A\_ 1209,5FRY\_ERH\_B\_1209,5FS0\_5JC\_A\_1209,5FS0\_5JC\_B\_1210,5FS5\_KGM\_A\_1159,5FSM\_N91\_A\_202,5 FTG\_NBR\_A\_1458,5FV9\_Y6W\_B\_1570,5FV9\_Y6W\_F\_1572,5FWR\_3X8\_A\_182,5FWR\_3X8\_C\_182,5FW R\_3X8\_D\_182,5FWR\_3X8\_E\_182,5FWR\_3X8\_F\_182,5FWR\_3X8\_G\_182,5FWR\_3X8\_H\_182,5G17\_6DK\_ A\_373,5G17\_6DK\_B\_373,5G1A\_7H1\_B\_373,5G1N\_PAL\_B\_3226,5G1N\_PAL\_C\_3226,5G1N\_PAL\_D\_322 6,5G2G\_EQU\_A\_1129,5G2G\_EQU\_B\_1129,5G2O\_NAI\_A\_1400,5G3U\_ITW\_A\_420,5G3U\_ITW\_B\_420,5G 45\_A7W\_A\_1509,5G4M\_O82\_A\_1292,5G4M\_O82\_B\_1294,5G4N\_O83\_A\_1294,5G4N\_O83\_B\_1293,5G4O \_O80\_A\_1293,5G4O\_O80\_B\_1292,5G5F\_GSH\_A\_1222,5G5Z\_DQR\_A\_544,5G5Z\_DQR\_B\_544,5G5Z\_DQ R\_C\_544,5G5Z\_DQR\_D\_544,5G61\_FNY\_B\_544,5G61\_FNY\_C\_544,5G61\_FNY\_D\_544,5GGJ\_PNA\_A\_301 ,5GGJ\_PNA\_B\_301,5GGK\_MBE\_A\_301,5GGL\_6ZC\_B\_301,5GGN\_LEC\_A\_301,5GGN\_LEC\_B\_301,5GID \_VDP\_A\_501,5GIE\_VDP\_D\_501,5GJO\_PLP\_A\_406,5GJO\_PLP\_B\_404,5GLZ\_BGC\_B\_800,5GLZ\_BGC\_D \_800,5GMH\_RX8\_A\_901,5GMH\_RX8\_B\_901,5GMM\_949\_A\_302,5GMM\_949\_A\_303,5GMM\_949\_A\_304, 5GMM\_949\_B\_303,5GMM\_949\_B\_304,5GMM\_949\_B\_305,5GOE\_GDP\_A\_901,5GOF\_GTP\_A\_901,5GSA \_73K\_A\_501,5GSA\_73K\_B\_501,5GVK\_G45\_A\_502,5GVK\_G45\_B\_502,5GWE\_GWM\_B\_502,5GWE\_GW M\_C\_502,5GZD\_LAT\_A\_201,5GZE\_LAT\_A\_201,5GZF\_LAT\_A\_201,5GZG\_LAT\_A\_201,5H1T\_7FF\_B\_11 03,5H1U\_6KT\_A\_1101,5H1U\_6KT\_B\_1101,5H1U\_6KT\_C\_1101,5H1U\_6KT\_D\_1101,5H1V\_7FU\_B\_1103, 5H2U\_1N1\_A\_501,5H2U\_1N1\_C\_501,5H5F\_SAM\_A\_301,5H5O\_PCG\_A\_201,5H5O\_PCG\_B\_201,5H8T\_R TL\_A\_201,5H9Q\_TD2\_B\_201,5HA0\_LTD\_A\_201,5HA1\_RNE\_A\_201,5HA7\_NAP\_A\_401,5HA7\_NAP\_B\_ 401,5HA7\_WY1\_A\_402,5HA7\_WY1\_B\_402,5HBN\_RPI\_A\_206,5HBN\_RPI\_A\_207,5HBS\_RTL\_A\_201,5H F9\_HI6\_B\_610,5HIP\_61O\_A\_403,5HJG\_XDI\_A\_201,5HJQ\_I3P\_A\_401,5HKG\_RAP\_A\_201,5HS1\_VOR\_A \_602,5HTK\_FLC\_A\_601,5HTK\_FLC\_B\_601,5HTL\_C2E\_A\_201,5HTL\_C2E\_B\_201,5HV0\_AKG\_A\_310,5H V0\_AKG\_B\_306,5HV4\_AKG\_A\_306,5HVA\_DUP\_C\_201,5HVA\_DUP\_D\_201,5HVS\_65V\_A\_203,5HVS\_6 5V\_B\_203,5HVS\_65V\_C\_202,5HVT\_NVS\_A\_202,5HVT\_NVS\_B\_202,5HVT\_NVS\_C\_202,5HWU\_DUP\_B \_201,5HWV\_MBN\_A\_501,5HWV\_MBN\_B\_201,5I2E\_67D\_A\_201,5I3A\_HQE\_A\_303,5I3A\_HQE\_B\_304,5I 3B\_HQE\_A\_303,5I3V\_68M\_A\_404,5I3Y\_68K\_A\_401,5I6D\_AU6\_A\_402,5I6D\_AU6\_C\_402,5I7A\_68Q\_A\_ 401,5I7A\_68Q\_B\_401,5I7A\_68Q\_D\_401,5I7O\_S16\_A\_402,5I7O\_S16\_C\_402,5I7O\_S16\_D\_402,5I7R\_68W\_ A\_402,5I7R\_68W\_B\_402,5I8P\_VQ7\_B\_501,5I9Y\_1N1\_A\_1001,5I9Z\_627\_A\_1001,5IA0\_A5B\_A\_1001,5IA 0\_A5B\_B\_1001,5IA0\_A5B\_C\_1001,5IA1\_ZZL\_A\_1001,5IA3\_P17\_A\_1001,5IA4\_88Z\_A\_1001,5IBE\_69M\_ A\_403,5IBF\_69W\_A\_403,5IBF\_69W\_A\_404,5IBG\_69S\_A\_404,5IBG\_69S\_A\_405,5IBH\_69R\_A\_405,5IBH\_ 69R\_A\_406,5IE1\_6BS\_A\_407,5IE3\_OXD\_A\_602,5IE3\_OXD\_B\_602,5IG6\_6B3\_A\_505,5IGI\_ZIT\_A\_402,5I GJ\_CTY\_A\_402,5IGK\_BMF\_A\_202,5IGL\_BMF\_A\_1701,5IGP\_ERY\_A\_402,5IGT\_ERY\_A\_402,5IHH\_6B5 \_A\_201,5IKB\_KAI\_A\_301,5IKI\_A9H\_B\_502,5IL1\_SAM\_A\_601,5IM3\_DTP\_A\_1001,5IM3\_DTP\_A\_1004,5 IM3\_DTP\_B\_1001,5IM3\_DTP\_B\_1002,5IN4\_6CK\_A\_1003,5IN4\_6CK\_B\_401,5IN4\_6CK\_C\_1003,5IN5\_GF B\_A\_1003,5IN5\_GF B\_B\_401,5IN5\_GF B\_C\_1003,5IN5\_GF B\_D\_401,5IOQ\_DUR\_B\_302,5IOQ\_DUR\_B\_30



3,5IOQ\_DUR\_C\_302,5IOQ\_DUR\_D\_302,5IOR\_DUS\_A\_302,5IOS\_UMP\_A\_302,5IOS\_UMP\_A\_303,5IOS\_UMP\_C\_302,5IOS\_UMP\_D\_302,5IOT\_UMP\_A\_302,5IOT\_UMP\_B\_302,5IOT\_UMP\_C\_302,5IOT\_UMP\_D\_302,5IOY\_6C5\_A\_301,5IOY\_6C5\_A\_302,5IOY\_6C5\_A\_304,5IOZ\_6C4\_A\_301,5IPA\_6C8\_A\_301,5IPA\_6C8\_A\_302,5IPA\_6C8\_A\_303,5IRR\_GSP\_A\_402,5IRR\_GSP\_B\_402,5ISL\_MMK\_A\_601,5ITO\_6DB\_A\_304,5ITO\_6DB\_B\_303,5ITP\_6DB\_A\_301,5ITP\_6DB\_B\_301,5IU4\_ZMA\_A\_2401,5IVE\_6E8\_A\_601,5IVF\_6EB\_A\_601,5IVV\_6EN\_A\_601,5IW0\_6EP\_A\_601,5IW8\_6EC\_B\_401,5IXE\_14O\_A\_501,5IXE\_14O\_B\_501,5J0D\_6F9\_A\_1201,5J1R\_6FG\_A\_301,5J32\_IPM\_A\_502,5J32\_IPM\_A\_504,5J32\_IPM\_C\_502,5J32\_IPM\_C\_504,5J3L\_6FR\_A\_301,5J5F\_6GH\_A\_303,5J5F\_6GH\_B\_305,5J5F\_6GH\_C\_303,5J5F\_6GH\_D\_303,5J5F\_6GH\_E\_302,5J5F\_6GH\_F\_305,5J5F\_6GH\_G\_302,5J5F\_6GH\_H\_304,5J5F\_6GH\_I\_304,5J5G\_6GF\_A\_304,5J5G\_6GF\_C\_304,5J5G\_6GF\_C\_305,5J5G\_6GF\_E\_304,5J5G\_6GF\_F\_302,5J5G\_6GF\_F\_303,5J5G\_6GF\_H\_304,5J5I\_6GM\_A\_302,5J5I\_6GM\_A\_303,5J5I\_6GM\_B\_302,5J5I\_6GM\_C\_302,5J5I\_6GM\_E\_302,5J5I\_6GM\_F\_302,5J5I\_6GM\_F\_303,5J5I\_6GM\_G\_302,5J5I\_6GM\_I\_302,5JA0\_FPP\_F\_402,5JAD\_FB2\_A\_504,5JAL\_6HO\_A\_505,5JAM\_NAI\_A\_401,5JAQ\_NAI\_A\_401,5JGK\_SAH\_A\_301,5JGK\_SAH\_B\_301,5JGL\_SAM\_A\_301,5JGL\_SAM\_B\_301,5JH7\_6K9\_D\_502,5JHB\_6K5\_A\_1201,5JI8\_6KT\_A\_301,5JOX\_EDG\_A\_601,5JQ2\_14O\_B\_502,5JQ5\_I74\_A\_302,5JS3\_6MG\_E\_411,5JSG\_6P9\_A\_301,5JSG\_6P9\_B\_301,5JSS\_6NG\_E\_406,5JT9\_7AF\_E\_412,5JXN\_6NN\_E\_411,5JZS\_FGZ\_B\_1000,5K2A\_ZMA\_A\_1201,5K2C\_ZMA\_A\_1201,5K4Z\_6Q8\_A\_402,5K7H\_IVC\_A\_305,5K7H\_IVC\_B\_302,5K8S\_CMP\_A\_501,5K8S\_CMP\_B\_501,5K9W\_OTA\_A\_402,5KA1\_OTA\_A\_301,5KA3\_OTA\_A\_401,5KA7\_OTA\_A\_303,5KA9\_OTA\_A\_307,5KAD\_OTA\_A\_401,5KAD\_OTA\_B\_401,5KAT\_P4P\_A\_201,5KAX\_RHQ\_A\_201,5KAX\_RHQ\_B\_201,5KB3\_4CT\_A\_301,5KBE\_IPH\_A\_602,5KBE\_IPH\_B\_302,5KBF\_CMP\_A\_501,5KBF\_CMP\_A\_502,5KBF\_CMP\_B\_501,5KBF\_CMP\_B\_502,5KCB\_ET\_A\_201,5KCP\_NAJ\_A\_377,5KCP\_PFB\_A\_378,5KCP\_PFB\_A\_379,5KCP\_PFB\_B\_378,5KCP\_PFB\_B\_379,5KCEZ ETF\_A\_378,5KCEZ ETF\_B\_378,5KCEZ\_NAJ\_A\_377,5KCEZ\_NAJ\_B\_377,5KEJ\_GTX\_A\_301,5KEJ\_GTX\_B\_301,5KEW\_6SB\_A\_301,5KEW\_6SB\_B\_301,5KEW\_6SB\_D\_301,5KEW\_6SB\_F\_301,5KGS\_6SR\_B\_502,5KHD\_C2E\_A\_201,5KHD\_C2E\_A\_202,5KHD\_C2E\_R\_202,5KHH\_6SW\_A\_701,5KHI\_6SX\_A\_701,5KHJ\_6SY\_A\_701,5KHJ\_6SY\_B\_701,5KHK\_6SZ\_A\_701,5KLP\_IHP\_A\_401,5KLP\_IHP\_B\_401,5KO1\_6UY\_A\_501,5KO8\_IYR\_A\_302,5KR0\_478\_A\_101,5KR1\_017\_B\_101,5KR2\_ROC\_A\_101,5KR2\_ROC\_C\_101,5KRD\_6X8\_A\_302,5KRD\_6X8\_B\_302,5KVA\_SAM\_B\_301,5KWW\_6YA\_F\_613,5KXE\_6Y2\_A\_306,5KXE\_6Y2\_B\_308,5KXE\_6Y2\_C\_303,5KXE\_6Y2\_D\_303,5L1O\_7PF\_A\_401,5L1Q\_7DF\_A\_502,5L1S\_7PF\_A\_401,5L1T\_7PF\_A\_401,5L1U\_7PF\_A\_401,5L1V\_7PF\_A\_401,5L3A\_6DP\_A\_1201,5L4F\_6J1\_A\_201,5L4F\_6J1\_B\_201,5L4I\_6J3\_A\_201,5L4I\_6J3\_B\_201,5L4J\_6JD\_A\_201,5L4J\_6JD\_B\_201,5L4M\_SBK\_A\_201,5L4M\_SBK\_B\_201,5L4Q\_LKB\_A\_401,5L4Q\_LKB\_B\_401,5L7V\_GNL\_B\_601,5L8N\_6RQ\_A\_1001,5L8N\_6RQ\_C\_1001,5L8P\_6MG\_E\_406,5L91\_C0R\_A\_502,5L91\_C0R\_A\_503,5L91\_C0R\_A\_504,5L91\_C0R\_A\_505,5L91\_C0R\_B\_502,5L91\_C0R\_B\_503,5L91\_C0R\_B\_505,5L92\_C0R\_A\_502,5L9G\_MO0\_B\_401,5L9I\_SNW\_A\_401,5L9L\_GOP\_B\_401,5L9O\_GOP\_A\_301,5L9O\_GOP\_B\_301,5L9R\_OGA\_A\_502,5L9V\_OGA\_A\_502,5LAS\_OGA\_A\_502,5LAS\_OGA\_B\_502,5LAT\_UN9\_A\_502,5LB6\_UN9\_A\_502,5LBB\_UN9\_A\_502,5LBC\_UN9\_A\_503,5LBE\_UN9\_A\_502,5LD8\_6U5\_A\_502,5LD8\_6U5\_B\_502,5LDM\_2AM\_B\_201,5LDP\_ATP\_A\_201,5LDP\_ATP\_B\_201,5LDP\_ATP\_B\_202,5LDQ\_NAP\_A\_201,5LDQ\_NAP\_B\_201,5LDQ\_NAP\_C\_201,5LHT\_TIH\_A\_301,5LIF\_6XO\_E\_411,5LJB\_RTL\_A\_201,5LJE\_RTL\_A\_201,5LJI\_FMN\_A\_201,5LJI\_FMN\_C\_201,5LLI\_6Z3\_C\_301,5LLI\_6Z3\_F\_301,5LLI\_6Z3\_I\_301,5LLI\_6Z3\_L\_301,5LN8\_GAL\_A\_201,5LPJ\_XDM\_A\_1201,5LPK\_XDM\_A\_1201,5LPK\_XDM\_B\_1201,5LPK\_XDM\_C\_1201,5LPK\_XDM\_D\_1201,5LPK\_XDM\_E\_1201,5LPK\_XDM\_E\_1202,5LPL\_71X\_A\_1201,5LPM\_71Y\_A\_1201,5LPM\_71Y\_A\_1202,5LPM\_71Y\_B\_1201,5LPM\_71Y\_B\_1202,5LS7\_ACO\_B\_203,5LSG\_QZQ\_A\_501,5LUU\_77X\_A\_203,5LVD\_79F\_E\_410,5LVN\_ADN\_A\_402,5LVQ\_2LX\_A\_904,5LVR\_78Y\_A\_904,5M04\_GDP\_A\_401,5M42\_FMN\_A\_2001,5M69\_7GR\_E\_408,5M7P\_ADP\_A\_502,5M7P\_ADP\_B\_502,5M7U\_XHA\_B\_1001,5MA7\_7K0\_E\_412,5MAM\_SRO\_0\_101,5MAM\_SRO\_C\_101,5MAM\_SRO\_E\_101,5MAM\_SRO\_G\_101,5MAM\_SRO\_I\_101,5MAM\_SRO\_K\_101,5MAM\_SRO\_M\_101,5MAM\_SRO\_O\_101,5MAM\_SRO\_W\_101,5MAM\_SRO\_Y\_101,5MAM\_SRO\_Y\_102,5MB4\_NAG\_A\_510,5MB4\_NAG\_A\_511,5MB4\_NAG\_A\_512,5MB4\_NAG\_A\_514,5MB4\_NDG\_A\_509,5MB4\_NDG\_A\_515,5MF6\_7M2\_A\_410,5MG2\_7M8\_A\_1704,5MGE\_7MX\_A\_2001,5MGF\_7MW\_A\_2001,5MGJ\_7MX\_A\_1901,5MGK\_7MW\_A\_1901,5MK9\_BCD\_A\_901,5MKA\_RCD\_A\_401,5ML2\_NH6\_B\_201,5ML3\_DL3\_B\_201,5ML6\_9GD\_B\_201,5MN1\_2AP\_A\_306,5MNB\_2AP\_A\_304,5MO8\_C98\_A\_404,5MO8\_C98\_B\_401,5MOB\_A8S\_A\_301,5MOD\_86L\_A\_404,5MOE\_OQC\_A\_409,5MOE\_OQC\_A\_410,5MOE\_OQC\_A\_411,5MOE\_OQC\_B\_409,5MPZ\_418\_A\_1201,5MPZ\_418\_A\_1202,5MQE\_PKU\_A\_1201,5MRB\_C5N\_A\_901,5MT0\_QJS\_A\_301,5MT4\_M7O\_A\_301,5MTX\_FJI\_A\_401,5MTY\_HB9\_A\_401,5MWJ\_EBU\_A\_802,5MXF\_MFU\_A\_401,5MXF\_MFU\_A\_402,5MYG\_LS8\_A\_801,5MYG\_LS8\_B\_801,5MYG\_LS8\_C\_801,5MYG\_LS8\_D\_801,5MZ8\_SIN\_A\_501,5MZ8\_SIN\_B\_501,5MZ8\_SIN\_C\_501,5N0F\_7K2\_B\_401,5N16\_8FN\_A\_401,5N16\_8FN\_A\_404,5N16\_8FN\_C\_401,5N16\_8FN\_D\_401,5N17\_8FK\_A\_401,5N17\_8FK\_B\_401,5N1X\_8HH\_B\_201,5N1X\_8HH\_B\_202,5N1X\_8HH\_C\_201,5N1X\_8HH\_D\_201,5N53\_8NB\_A\_301,5N53\_8NB\_B\_301,5N55\_8NN\_A\_502,5N55\_8NN\_C\_502,5N58\_93W\_A\_502,5N58\_93W\_B\_502,5N5S\_NAP\_A\_600,5N5S\_NAP\_B\_502,5N5S\_NAP\_D\_503,5N69\_2OW\_A\_904,5N69\_2OW\_B\_904,5NCF\_8T5\_A\_201,5NCF\_8T5\_B\_204,5NE5\_KIF\_A\_501,5NGZ\_2BG\_A\_201,5NJZ\_8ZH\_A\_1001,5NK2\_8ZZ\_A\_1001,5NK6\_90W\_A\_1001,5NK7\_

8ZZ\_A\_1001,5NK9\_912\_A\_1001,5NKB\_8ZT\_A\_1001,5NKD\_91K\_A\_1001,5NKG\_8ZK\_A\_1001,5NKI\_8Z  
W\_A\_1001,5NU3\_99E\_A\_1201,5NU5\_99E\_A\_1201,5NU5\_99E\_B\_1201,5NVV\_9BT\_C\_301,5NVV\_9BT\_F  
\_301,5NVV\_9BT\_I\_301,5NVV\_9BT\_L\_301,5NVW\_9BW\_C\_301,5NVW\_9BW\_F\_301,5NVW\_9BW\_I\_301,  
5NVW\_9BW\_L\_301,5NVX\_4YY\_C\_301,5NVX\_4YY\_F\_301,5NVX\_4YY\_I\_301,5NVX\_4YY\_L\_301,5NW  
0\_9BK\_C\_301,5NW0\_9BK\_I\_301,5NW0\_9BK\_L\_301,5NW1\_9BH\_C\_301,5NW1\_9BH\_I\_301,5NW2\_9B8\_  
I\_301,5NW2\_9B8\_L\_301,5NZP\_9EW\_A\_301,5NZP\_9EW\_B\_301,5O0A\_9FH\_A\_201,5O0A\_9FH\_B\_201,5O  
0A\_9FH\_C\_201,5O0B\_9FE\_A\_201,5O0B\_9FE\_A\_202,5O0B\_9FE\_B\_201,5O0B\_9FE\_B\_202,5O0B\_9FE\_C  
\_201,5O2T\_GSP\_A\_202,5OCA\_9QZ\_A\_201,5OFV\_9TZ\_A\_401,5OFV\_9TZ\_B\_401,5OFW\_9TW\_B\_401,5O  
R9\_JR5\_A\_2001,5SYN\_71T\_B\_301,5SYN\_71T\_C\_301,5SYN\_71T\_D\_301,5T3N\_75G\_A\_503,5T3N\_75G\_B  
\_504,5T46\_MGP\_C\_301,5T7S\_LBT\_A\_201,5T9U\_7HG\_A\_300,5T9U\_7HG\_B\_300,5T9U\_7HG\_C\_300,5T9  
U\_7HG\_D\_300,5T9W\_78E\_A\_300,5TA2\_78X\_A\_300,5TA4\_838\_A\_201,5TBE\_78L\_A\_401,5TBM\_79A\_A  
\_401,5TCY\_5LC\_A\_402,5TCY\_5LC\_C\_402,5TE0\_XIN\_A\_401,5TF9\_7AV\_A\_501,5TRF\_7HC\_A\_201,5TR  
F\_7HC\_B\_201,5TRF\_7HC\_C\_201,5TRF\_7HC\_D\_201,5TVA\_COA\_A\_302,5TWJ\_SAM\_A\_201,5TWJ\_SAM  
\_B\_201,5TWJ\_SAM\_C\_201,5TWJ\_SAM\_D\_201,5TXY\_7Q1\_A\_303,5TY8\_7Q1\_A\_302,5TY9\_7QV\_A\_302,  
5TYA\_7QS\_A\_302,5TZ1\_VT1\_A\_602,5TZ1\_VT1\_B\_602,5U00\_7OV\_B\_1001,5U00\_7OV\_C\_1001,5U0D\_7  
R7\_A\_302,5U0E\_7R4\_A\_302,5U0F\_7R1\_A\_302,5U5U\_NTN\_A\_302,5U5V\_7WA\_A\_302,5U5W\_7W1\_A\_3  
02,5U5X\_TP5\_A\_302,5U5Y\_7W4\_A\_302,5U5Z\_7VP\_A\_302,5U61\_7WG\_A\_302,5U8U\_FAD\_A\_501,5U8U  
\_FAD\_B\_501,5U8U\_FAD\_C\_501,5U8U\_FAD\_D\_501,5U8V\_FAD\_A\_501,5U8V\_FAD\_B\_502,5U8V\_FAD\_  
C\_501,5U8W\_FAD\_A\_501,5U8W\_FAD\_B\_501,5U8W\_FAD\_C\_501,5U8W\_FAD\_D\_501,5UE4\_5XQ\_B\_30  
7,5UFR\_88J\_A\_601,5UFR\_88J\_B\_601,5UG2\_86J\_A\_302,5UK8\_8DV\_A\_1101,5ULP\_KB1\_A\_301,5ULP\_K  
B1\_B\_301,5UNJ\_RJW\_A\_601,5UNY\_8FD\_B\_804,5UNY\_M4R\_A\_803,5UNY\_M4R\_B\_803,5USZ\_SKE\_A\_  
901,5UT4\_DQX\_A\_901,5UTR\_8MP\_A\_401,5UTR\_8MP\_B\_401,5UXF\_2BA\_A\_401,5V13\_JH3\_A\_301,5V1  
3\_JH3\_B\_301,5V13\_JH3\_C\_301,5VB6\_927\_A\_602,5VB7\_921\_A\_602,5VC3\_DB8\_A\_601,5VC4\_XZN\_A\_6  
01,5VC5\_96M\_A\_601,5VC6\_P48\_A\_601,5VCV\_1N1\_A\_404,5VCW\_93J\_A\_401,5VCW\_93J\_B\_401,5VCZ\_  
XZN\_A\_401,5VD0\_8X7\_A\_401,5VD1\_P48\_A\_401,5VD3\_H8H\_A\_401,5VGY\_9AA\_A\_304,5VSC\_9HJ\_A\_  
1506,5VSC\_9HJ\_B\_1506,5VSD\_9HJ\_B\_3006,5VSE\_9HG\_A\_1506,5VSE\_9HG\_B\_1506,5VSF\_9HG\_B\_300  
6,5VW2\_NAP\_A\_404,5VW3\_NAP\_A\_403,5W10\_CMP\_A\_201,5W10\_CMP\_B\_201,5W10\_CMP\_D\_201,5W  
BM\_A4G\_A\_301,5WBM\_A4G\_B\_301,5WBM\_A4G\_B\_302,5WBO\_A1Y\_A\_301,5WK9\_CAM\_A\_503,5WU  
K\_73K\_A\_502,5X4M\_7ZF\_A\_801,5X4N\_7ZL\_A\_801,5X4O\_YAM\_A\_801,5X4P\_7ZO\_A\_801,5X4Q\_7Z6\_  
A\_801,5X5D\_UMP\_A\_401,5X5D\_UMP\_B\_401,5X5D\_UMP\_C\_401,5X5D\_UMP\_D\_401,5X5D\_UMP\_E\_40  
1,5X5D\_UMP\_F\_401,5X66\_UMP\_A\_401,5X66\_UMP\_C\_401,5X66\_UMP\_D\_401,5X66\_UMP\_E\_401,5X67  
\_UMP\_A\_401,5X90\_80R\_A\_801,5XG5\_A2G\_A\_201,5XG5\_A2G\_A\_202,5XG5\_A2G\_A\_203,5XKR\_BZE\_  
A\_201,5XKR\_BZE\_B\_201,5XKR\_BZE\_D\_202,5XSJ\_XYP\_X\_500,6ABP\_ARA\_A\_307,6ABP\_ARB\_A\_308,  
7ABP\_FCB\_A\_308,7CAT\_NDP\_A\_508,7CAT\_NDP\_B\_508,8CAT\_NDP\_A\_508,8CAT\_NDP\_B\_508,8GPB\_  
AMP\_A\_930
